# Supplementary material for: Comparison of Genetic Diversity between Chinese and American Soybean (Glycine max (L.)) Accessions Revealed by High-Density SNPs
Source: Front Plant Sci. 2017 Nov 30;8:2014. doi: 10.3389/fpls.2017.02014 (PMC5715234; doi:10.3389/fpls.2017.02014)
Supplement: Supplementary file 7 [file Table7.XLSX]

## Sheet: Sheet1
Supplementary Table S7 Kinship matrix of the 577 soybean accessions
Taxa	C001-JL-Ⅱ	C002-JL-Ⅱ	C003-JL-Ⅲ	C004-JL-Ⅱ	C005-JL-Ⅱ	C006-JL-Ⅰ	C007-JL-Ⅱ	C008-BJ-Ⅲ	C009-JL-Ⅱ	C010-JL-Ⅱ	C011-JL-Ⅰ	C012-LN-Ⅱ	C013-JL-Ⅱ	C014-JL-Ⅱ	C015-JL-Ⅱ	C016-JL-Ⅲ	C017-JL-Ⅲ	C018-JL-Ⅱ	C019-JL-Ⅰ	C020-JL-Ⅰ	C021-LN-Ⅱ	C022-JL-Ⅱ	C023-JL-Ⅱ	C024-JL-Ⅱ	C025-JL-Ⅲ	C026-JL-Ⅲ	C027-JL-Ⅰ	C028-JL-Ⅱ	C029-JL-Ⅰ	C030-JL-Ⅱ	C031-JL-Ⅲ	C032-JL-Ⅲ	C033-JL-Ⅱ	C034-JL-Ⅱ	C035-JL-Ⅱ	C036-JL-Ⅰ	C037-JL-Ⅱ	C038-JL-Ⅱ	C039-JL-Ⅰ	C040-JL-Ⅱ	C041-JL-Ⅱ	C042-JL-Ⅱ	C043-JL-Ⅲ	C044-JL-Ⅲ	C045-JL-Ⅱ	C046-JL-Ⅱ	C047-JL-Ⅱ	C048-JL-Ⅱ	C049-JL-0
C001-JL-Ⅱ		0.57553	0.687044	0.521685	0.647395	1.10434	0.860907	0	0.339432	0.737286	0.762241	0.19333	0.180796	0.729218	0.647179	0.970738	0.468116	0.783515	0.661703	0.252937	0.766563	0.516068	0.683595	0.611692	0.501022	0.636103	0.589762	0.715488	0.599696	0.678699	0.872709	0.722521	0.377537	0.410666	0.268326	0.906166	0.759697	0.671823	0.487589	0.683841	0.39684	0.666294	0.55844	0.722876	0.621365	0.483558	1.10193	1.33583	0.545827
C002-JL-Ⅱ	0.57553		0.801496	0.718183	0.791926	0.749616	0.647208	0	0.181161	0.860328	0.78806	0.166197	0.212881	0.423674	0.964487	0.847512	0.391879	0.771802	0.269949	0.269324	0.813883	0.598033	0.477674	0.396322	0.308681	0.665477	0.576713	0.95682	0.72482	0.378717	0.549293	0.651096	0.672282	0.141342	0.252046	0.994133	0.528911	0.268028	0.627339	0.43993	0.194293	0.337345	0.255685	0.661612	0.661436	0.383825	0.623458	0.542805	0.327896
C003-JL-Ⅲ	0.687044	0.801496		0.590337	0.945885	0.772943	0.587106	0	0.125401	0.835305	0.723833	0	0.0139885	0.400749	0.980552	0.764287	0.280654	1.16361	0.620819	0.767451	0.901646	0.778678	0.397463	0.406755	0.480995	0.375056	0.685276	1.05402	0.631847	0.579211	0.52492	1.32334	1.02532	0.250498	0.149949	0.898077	0.59532	0.237356	0.48991	0.739509	0.404832	0.374804	0.281812	1.3165	1.01076	0.420844	0.746075	0.565338	0.314515
C004-JL-Ⅱ	0.521685	0.718183	0.590337		0.451661	0.724617	0.317314	0	0.12085	0.537065	0.546116	0.0704628	0.421328	0.443795	0.597575	0.508573	0.300883	0.650104	0.310228	0.0210641	0.500764	0.454417	0.293779	0.241372	0.0787402	0.393737	0.327395	0.683195	0.418251	0.185946	0.374149	0.355547	0.617861	0.219548	0.130699	0.490372	0.299209	0.433965	0.443531	0.513794	0.247294	0.432035	0.298048	0.352864	0.403999	0.294172	0.553728	0.621004	0.298768
C005-JL-Ⅱ	0.647395	0.791926	0.945885	0.451661		0.481363	0.84013	0	0.0495819	1.58378	0.89698	0.292779	0.12892	0.402047	0.585841	0.531766	0.433507	1.00339	0.614937	0.709782	1.55698	0.527898	0.509698	0.516334	0.397099	0.271809	0.65318	0.653539	0.339758	0.534909	0.596918	1.23212	0.587608	0.347692	0.281955	0.939957	0.661396	0.361241	0.526143	0.660375	0.409366	0.159204	0.231914	1.23515	1.5994	0.284755	0.438379	0.379358	0.125603
C006-JL-Ⅰ	1.10434	0.749616	0.772943	0.724617	0.481363		1.20921	0	0.256722	0.463079	0.980007	0.420554	0.491061	0.777711	1.27079	1.24666	0.626467	0.850813	0.400674	0.0483289	0.460392	0.703983	0.723809	0.682999	0.667328	1.00683	0.882774	1.32443	1.12258	0.91183	1.12653	0.412995	0.710773	0.664825	0.509652	0.786508	0.423091	0.692057	0.610454	0.985998	0.616168	0.718352	0.768518	0.414672	0.376703	0.808669	1.09361	1.15227	0.289639
C007-JL-Ⅱ	0.860907	0.647208	0.587106	0.317314	0.84013	1.20921		0	0.228475	0.849821	0.916645	0.509376	0.451999	0.641523	0.756282	0.871806	0.573038	0.709104	0.666133	0.292536	0.861207	0.606566	0.867742	0.801152	0.837775	0.734843	0.638131	0.80145	0.692798	1.30061	1.40684	0.80049	0.408483	0.578948	0.539202	0.848326	0.56496	0.696221	0.596926	0.835453	0.539368	0.351319	0.541068	0.804244	0.72036	0.781185	0.70661	0.651645	0.194267
C008-BJ-Ⅲ	0	0	0	0	0	0	0		0.996807	0	0	0	0	0	0	0	0.00603706	0	0	0	0	0	0	0	0	0	0	0	0	0.118925	0	0	0.0409171	0	0	0	0	0.0407043	0	0	0	0.193241	0	0	0	0	0.237297	0.109826	0.165228
C009-JL-Ⅱ	0.339432	0.181161	0.125401	0.12085	0.0495819	0.256722	0.228475	0.996807		0.0757334	0.158005	0.108188	0.0601747	0.118116	0.0293843	0.171654	0.258043	0.217458	0.241778	0.0331028	0.0794429	0.111382	0.157518	0.20405	0.146011	0.314475	0	0.0515977	0.163917	0.35063	0.316586	0.168452	0.139592	0.195234	0.0686378	0.0679241	0.0845848	0.183709	0.0661093	0.0664263	0.0836819	0.348469	0.189412	0.172652	0.0732898	0.0987067	0.356673	0.299432	0.24612
C010-JL-Ⅱ	0.737286	0.860328	0.835305	0.537065	1.58378	0.463079	0.849821	0	0.0757334		0.970553	0.208486	0.118622	0.361297	0.484927	0.534875	0.410092	0.83979	0.598953	0.630881	1.72291	0.475314	0.474849	0.502077	0.304574	0.291469	0.523326	0.548294	0.281287	0.524816	0.632524	1.1001	0.484158	0.307657	0.284975	0.940227	0.705083	0.41909	0.492997	0.557784	0.329217	0.190784	0.229463	1.09654	1.3473	0.246485	0.416899	0.434438	0.21338
C011-JL-Ⅰ	0.762241	0.78806	0.723833	0.546116	0.89698	0.980007	0.916645	0	0.158005	0.970553		0.288773	0.263084	0.52886	0.698552	0.844982	0.405201	0.811643	0.490203	0.27808	0.908427	0.562246	0.592836	0.52532	0.469324	0.5658	0.625869	0.772086	0.629399	0.671521	0.800673	0.686869	0.485195	0.377791	0.328217	0.745019	0.507218	0.441684	0.490478	0.675617	0.395002	0.380099	0.424524	0.681447	0.800399	0.430414	0.658506	0.631439	0.288945
C012-LN-Ⅱ	0.19333	0.166197	0	0.0704628	0.292779	0.420554	0.509376	0	0.108188	0.208486	0.288773		0.44949	0.411324	0.164007	0.204509	0.532311	0.127446	0.239717	0.091652	0.171519	0.227142	0.473614	0.434221	0.368815	0.214794	0.0961267	0.154211	0.177847	0.404329	0.415867	0.0930254	0	0.492538	0.438178	0.210785	0.180069	0.593264	0.337571	0.368728	0.317342	0.343612	0.383243	0.0999939	0.269634	0.460863	0.20367	0.101926	0.0677743
C013-JL-Ⅱ	0.180796	0.212881	0.0139885	0.421328	0.12892	0.491061	0.451999	0	0.0601747	0.118622	0.263084	0.44949		0.643509	0.209005	0.287697	0.317521	0.0256205	0.340538	0	0.0967326	0.300387	0.453518	0.40909	0.293597	0.174956	0.222204	0.229043	0.191653	0.238912	0.390776	0	0.310346	0.35262	0.493998	0.0997738	0.218394	0.440827	1.16721	0.377761	0.335068	0.210205	0.351768	0.00360126	0.118898	0.43232	0.243762	0.17541	0
C014-JL-Ⅱ	0.729218	0.423674	0.400749	0.443795	0.402047	0.777711	0.641523	0	0.118116	0.361297	0.52886	0.411324	0.643509		0.375803	0.637709	0.512037	0.429719	0.463957	0.051652	0.353741	0.498323	0.705585	0.616396	0.431738	0.487524	0.385358	0.440577	0.454629	0.403648	0.591585	0.268626	0.387132	0.434631	0.377692	0.433889	0.413525	0.575244	0.547575	0.621586	0.428804	0.380912	0.471856	0.268463	0.384645	0.490595	0.575965	0.650366	0.308285
C015-JL-Ⅱ	0.647179	0.964487	0.980552	0.597575	0.585841	1.27079	0.756282	0	0.0293843	0.484927	0.698552	0.164007	0.209005	0.375803		0.924954	0.381042	0.878973	0.21715	0.356754	0.531504	0.665554	0.387044	0.392762	0.328901	0.683835	0.88005	1.87356	1.03953	0.530291	0.682607	0.677345	0.890877	0.42579	0.333051	0.985424	0.382684	0.287875	0.610974	0.672521	0.343479	0.241695	0.374485	0.693995	0.534095	0.672252	0.836359	0.833242	0.316198
C016-JL-Ⅲ	0.970738	0.847512	0.764287	0.508573	0.531766	1.24666	0.871806	0	0.171654	0.534875	0.844982	0.204509	0.287697	0.637709	0.924954		0.417514	0.667807	0.409119	0.0928442	0.501104	0.675572	0.652988	0.58809	0.501372	0.886679	0.810349	1.02262	0.936619	0.636587	0.77403	0.456686	0.632734	0.423812	0.357217	0.804891	0.492802	0.423587	0.531395	0.602174	0.325696	0.420344	0.518398	0.468221	0.446277	0.732535	0.686334	0.772108	0.346843
C017-JL-Ⅲ	0.468116	0.391879	0.280654	0.300883	0.433507	0.626467	0.573038	0.00603706	0.258043	0.410092	0.405201	0.532311	0.317521	0.512037	0.381042	0.417514		0.319805	0.433455	0.0434357	0.37435	0.295101	0.434125	0.910899	0.531686	0.528689	0.235634	0.392567	0.388596	0.378915	0.477335	0.277127	0.463182	1.11513	0.649147	0.359822	0.360214	0.713684	0.369575	0.380804	0.538997	0.482075	0.538918	0.272698	0.291884	0.364959	0.52705	0.451926	0.0503673
C018-JL-Ⅱ	0.783515	0.771802	1.16361	0.650104	1.00339	0.850813	0.709104	0	0.217458	0.83979	0.811643	0.127446	0.0256205	0.429719	0.878973	0.667807	0.319805		0.577442	0.730758	0.952794	0.589487	0.48782	0.403421	0.404916	0.565288	0.759184	0.953502	0.675285	0.529982	0.596458	1.31689	0.755254	0.328315	0.249381	1.02054	0.603591	0.264855	0.521931	0.724933	0.411312	0.530187	0.378759	1.30217	1.12602	0.330279	0.685022	0.635101	0.230311
C019-JL-Ⅰ	0.661703	0.269949	0.620819	0.310228	0.614937	0.400674	0.666133	0	0.241778	0.598953	0.490203	0.239717	0.340538	0.463957	0.21715	0.409119	0.433455	0.577442		0.688109	0.617205	0.292191	0.551103	0.528815	0.452491	0.361027	0.0527986	0.33052	0.344657	0.479892	0.518582	0.916714	0.194707	0.356814	0.175761	0.360245	0.506065	0.414915	0.383309	0.456076	0.372154	0.2758	0.296442	0.937629	0.605183	0.270421	0.478616	0.356034	0.386532
C020-JL-Ⅰ	0.252937	0.269324	0.767451	0.0210641	0.709782	0.0483289	0.292536	0	0.0331028	0.630881	0.27808	0.091652	0	0.051652	0.356754	0.0928442	0.0434357	0.730758	0.688109		0.638892	0.124875	0.100597	0.140119	0.357911	0	0.40302	0.444724	0.122911	0.418332	0.199427	1.18104	0.469769	0.138595	0.094409	0.554544	0.313253	0.0472958	0.247072	0.252914	0.252068	0.129644	0.0200134	1.18437	0.824755	0	0.0102634	0	0.272197
C021-LN-Ⅱ	0.766563	0.813883	0.901646	0.500764	1.55698	0.460392	0.861207	0	0.0794429	1.72291	0.908427	0.171519	0.0967326	0.353741	0.531504	0.501104	0.37435	0.952794	0.617205	0.638892		0.509111	0.508081	0.480784	0.352857	0.281301	0.527804	0.595736	0.303293	0.52905	0.630162	1.18448	0.536658	0.272982	0.260399	1.0127	0.726904	0.395872	0.500937	0.574892	0.312064	0.185205	0.209608	1.16866	1.38348	0.302954	0.474861	0.480995	0.194259
C022-JL-Ⅱ	0.516068	0.598033	0.778678	0.454417	0.527898	0.703983	0.606566	0	0.111382	0.475314	0.562246	0.227142	0.300387	0.498323	0.665554	0.675572	0.295101	0.589487	0.292191	0.124875	0.509111		1.13728	0.704298	0.497799	0.546645	0.663816	0.654478	0.549739	0.46193	0.490603	0.463709	0.669205	0.260838	0.357269	0.714812	0.461291	0.186946	0.544072	0.600762	0.275727	0.17101	0.310352	0.467633	0.496061	0.667657	0.570284	0.618157	0.285048
C023-JL-Ⅱ	0.683595	0.477674	0.397463	0.293779	0.509698	0.723809	0.867742	0	0.157518	0.474849	0.592836	0.473614	0.453518	0.705585	0.387044	0.652988	0.434125	0.48782	0.551103	0.100597	0.508081	1.13728		1.1657	0.820665	0.695539	0.632869	0.462969	0.546418	0.599646	0.673887	0.439341	0.348798	0.417097	0.516061	0.680201	0.558022	0.36539	0.599893	0.736551	0.397811	0.20321	0.443986	0.44445	0.525682	0.720201	0.541008	0.621731	0.39717
C024-JL-Ⅱ	0.611692	0.396322	0.406755	0.241372	0.516334	0.682999	0.801152	0	0.20405	0.502077	0.52532	0.434221	0.40909	0.616396	0.392762	0.58809	0.910899	0.403421	0.528815	0.140119	0.480784	0.704298	1.1657		0.703112	0.57614	0.376556	0.43171	0.460887	0.525075	0.615458	0.426925	0.405973	0.979519	0.63091	0.542549	0.468747	0.714068	0.44768	0.562515	0.571767	0.24275	0.4997	0.428238	0.462166	0.531815	0.523646	0.498342	0.223379
C025-JL-Ⅲ	0.501022	0.308681	0.480995	0.0787402	0.397099	0.667328	0.837775	0	0.146011	0.304574	0.469324	0.368815	0.293597	0.431738	0.328901	0.501372	0.531686	0.404916	0.452491	0.357911	0.352857	0.497799	0.820665	0.703112		0.434711	0.407156	0.424965	0.425588	0.823657	0.70648	0.467374	0.580267	0.48892	0.412932	0.363029	0.29254	0.463476	0.351915	0.392596	0.357035	0.343461	0.469056	0.462509	0.419752	0.520077	0.519001	0.334771	0.0865077
C026-JL-Ⅲ	0.636103	0.665477	0.375056	0.393737	0.271809	1.00683	0.734843	0	0.314475	0.291469	0.5658	0.214794	0.174956	0.487524	0.683835	0.886679	0.528689	0.565288	0.361027	0	0.281301	0.546645	0.695539	0.57614	0.434711		0.355688	0.721204	1.09656	0.549763	0.626496	0.281147	0.283778	0.391376	0.471668	0.742331	0.433038	0.165767	0.458566	0.558506	0.378709	0.53129	0.550314	0.267419	0.189648	0.62608	0.57614	0.73662	0.423348
C027-JL-Ⅰ	0.589762	0.576713	0.685276	0.327395	0.65318	0.882774	0.638131	0	0	0.523326	0.625869	0.0961267	0.222204	0.385358	0.88005	0.810349	0.235634	0.759184	0.0527986	0.40302	0.527804	0.663816	0.632869	0.376556	0.407156	0.355688		0.99054	0.581523	0.2564	0.460472	0.652223	0.659982	0.201249	0.399291	0.899568	0.492776	0.121884	0.555897	0.688188	0.276338	0.200565	0.433263	0.653402	0.780952	0.4635	0.37131	0.470416	0.197456
C028-JL-Ⅱ	0.715488	0.95682	1.05402	0.683195	0.653539	1.32443	0.80145	0	0.0515977	0.548294	0.772086	0.154211	0.229043	0.440577	1.87356	1.02262	0.392567	0.953502	0.33052	0.444724	0.595736	0.654478	0.462969	0.43171	0.424965	0.721204	0.99054		1.16983	0.580734	0.746829	0.800897	0.995465	0.467185	0.369008	1.05079	0.444821	0.349789	0.650844	0.783023	0.403039	0.321787	0.456231	0.814878	0.636983	0.583426	0.708049	0.712298	0.307049
C029-JL-Ⅰ	0.599696	0.72482	0.631847	0.418251	0.339758	1.12258	0.692798	0	0.163917	0.281287	0.629399	0.177847	0.191653	0.454629	1.03953	0.936619	0.388596	0.675285	0.344657	0.122911	0.303293	0.549739	0.546418	0.460887	0.425588	1.09656	0.581523	1.16983		0.481048	0.631252	0.427466	0.618828	0.392835	0.318341	0.727216	0.357892	0.24954	0.485747	0.567259	0.352113	0.438831	0.470684	0.424301	0.292302	0.471887	0.590683	0.637161	0.332874
C030-JL-Ⅱ	0.678699	0.378717	0.579211	0.185946	0.534909	0.91183	1.30061	0.118925	0.35063	0.524816	0.671521	0.404329	0.238912	0.403648	0.530291	0.636587	0.378915	0.529982	0.479892	0.418332	0.52905	0.46193	0.599646	0.525075	0.823657	0.549763	0.2564	0.580734	0.481048		1.32179	0.620344	0.436573	0.331011	0.317454	0.523254	0.278207	0.404793	0.375749	0.584462	0.448173	0.470361	0.406216	0.627834	0.432766	0.573393	0.593204	0.43539	0.202398
C031-JL-Ⅲ	0.872709	0.549293	0.52492	0.374149	0.596918	1.12653	1.40684	0	0.316586	0.632524	0.800673	0.415867	0.390776	0.591585	0.682607	0.77403	0.477335	0.596458	0.518582	0.199427	0.630162	0.490603	0.673887	0.615458	0.70648	0.626496	0.460472	0.746829	0.631252	1.32179		0.572315	0.417424	0.429657	0.354464	0.692388	0.430169	0.619552	0.50079	0.672566	0.43407	0.448715	0.487324	0.579347	0.503879	0.586941	0.765547	0.683937	0.253064
C032-JL-Ⅲ	0.722521	0.651096	1.32334	0.355547	1.23212	0.412995	0.80049	0	0.168452	1.1001	0.686869	0.0930254	0	0.268626	0.677345	0.456686	0.277127	1.31689	0.916714	1.18104	1.18448	0.463709	0.439341	0.426925	0.467374	0.281147	0.652223	0.800897	0.427466	0.620344	0.572315		0.681057	0.289309	0.323147	1.08501	0.707344	0.196018	0.542147	0.574573	0.330622	0.264437	0.254265	1.94275	1.41384	0.287957	0.357577	0.265208	0.240892
C033-JL-Ⅱ	0.377537	0.672282	1.02532	0.617861	0.587608	0.710773	0.408483	0.0409171	0.139592	0.484158	0.485195	0	0.310346	0.387132	0.890877	0.632734	0.463182	0.755254	0.194707	0.469769	0.536658	0.669205	0.348798	0.405973	0.580267	0.283778	0.659982	0.995465	0.618828	0.436573	0.417424	0.681057		0.431895	0.167244	0.650427	0.220076	0.393798	0.516939	0.501726	0.317579	0.399548	0.300118	0.665549	0.533857	0.268679	0.521323	0.406391	0.118122
C034-JL-Ⅱ	0.410666	0.141342	0.250498	0.219548	0.347692	0.664825	0.578948	0	0.195234	0.307657	0.377791	0.492538	0.35262	0.434631	0.42579	0.423812	1.11513	0.328315	0.356814	0.138595	0.272982	0.260838	0.417097	0.979519	0.48892	0.391376	0.201249	0.467185	0.392835	0.331011	0.429657	0.289309	0.431895		1.01698	0.349299	0.311296	1.25449	0.257529	0.425006	0.862649	0.279503	0.636958	0.290031	0.332949	0.315668	0.486865	0.373219	0.118132
C035-JL-Ⅱ	0.268326	0.252046	0.149949	0.130699	0.281955	0.509652	0.539202	0	0.0686378	0.284975	0.328217	0.438178	0.493998	0.377692	0.333051	0.357217	0.649147	0.249381	0.175761	0.094409	0.260399	0.357269	0.516061	0.63091	0.412932	0.471668	0.399291	0.369008	0.318341	0.317454	0.354464	0.323147	0.167244	1.01698		0.557869	0.335961	0.504287	0.447461	0.429916	0.505648	0.0986777	0.656424	0.305678	0.336143	0.655467	0.17215	0.248013	0.0852066
C036-JL-Ⅰ	0.906166	0.994133	0.898077	0.490372	0.939957	0.786508	0.848326	0	0.0679241	0.940227	0.745019	0.210785	0.0997738	0.433889	0.985424	0.804891	0.359822	1.02054	0.360245	0.554544	1.0127	0.714812	0.680201	0.542549	0.363029	0.742331	0.899568	1.05079	0.727216	0.523254	0.692388	1.08501	0.650427	0.349299	0.557869		0.99256	0.313407	0.849361	0.511064	0.222915	0.264358	0.389227	1.08395	0.960004	0.419656	0.397289	0.688839	0.373752
C037-JL-Ⅱ	0.759697	0.528911	0.59532	0.299209	0.661396	0.423091	0.56496	0	0.0845848	0.705083	0.507218	0.180069	0.218394	0.413525	0.382684	0.492802	0.360214	0.603591	0.506065	0.313253	0.726904	0.461291	0.558022	0.468747	0.29254	0.433038	0.492776	0.444821	0.357892	0.278207	0.430169	0.707344	0.220076	0.311296	0.335961	0.99256		0.310114	0.551865	0.460023	0.354394	0.246656	0.344804	0.70931	0.624758	0.342909	0.370047	0.560695	0.369326
C038-JL-Ⅱ	0.671823	0.268028	0.237356	0.433965	0.361241	0.692057	0.696221	0.0407043	0.183709	0.41909	0.441684	0.593264	0.440827	0.575244	0.287875	0.423587	0.713684	0.264855	0.414915	0.0472958	0.395872	0.186946	0.36539	0.714068	0.463476	0.165767	0.121884	0.349789	0.24954	0.404793	0.619552	0.196018	0.393798	1.25449	0.504287	0.313407	0.310114		0.282555	0.329296	0.508377	0.365665	0.480139	0.204662	0.272411	0.35563	0.641716	0.536306	0.2649
C039-JL-Ⅰ	0.487589	0.627339	0.48991	0.443531	0.526143	0.610454	0.596926	0	0.0661093	0.492997	0.490478	0.337571	1.16721	0.547575	0.610974	0.531395	0.369575	0.521931	0.383309	0.247072	0.500937	0.544072	0.599893	0.44768	0.351915	0.458566	0.555897	0.650844	0.485747	0.375749	0.50079	0.542147	0.516939	0.257529	0.447461	0.849361	0.551865	0.282555		0.444746	0.266107	0.281322	0.350842	0.551223	0.527163	0.445889	0.31152	0.403096	0.153955
C040-JL-Ⅱ	0.683841	0.43993	0.739509	0.513794	0.660375	0.985998	0.835453	0	0.0664263	0.557784	0.675617	0.368728	0.377761	0.621586	0.672521	0.602174	0.380804	0.724933	0.456076	0.252914	0.574892	0.600762	0.736551	0.562515	0.392596	0.558506	0.688188	0.783023	0.567259	0.584462	0.672566	0.574573	0.501726	0.425006	0.429916	0.511064	0.460023	0.329296	0.444746		1.0389	0.356496	0.488324	0.575934	0.626508	0.631824	0.678228	0.722146	0.421572
C041-JL-Ⅱ	0.39684	0.194293	0.404832	0.247294	0.409366	0.616168	0.539368	0	0.0836819	0.329217	0.395002	0.317342	0.335068	0.428804	0.343479	0.325696	0.538997	0.411312	0.372154	0.252068	0.312064	0.275727	0.397811	0.571767	0.357035	0.378709	0.276338	0.403039	0.352113	0.448173	0.43407	0.330622	0.317579	0.862649	0.505648	0.222915	0.354394	0.508377	0.266107	1.0389		0.354039	0.471948	0.334194	0.379598	0.335718	0.430804	0.387679	0.185241
C042-JL-Ⅱ	0.666294	0.337345	0.374804	0.432035	0.159204	0.718352	0.351319	0.193241	0.348469	0.190784	0.380099	0.343612	0.210205	0.380912	0.241695	0.420344	0.482075	0.530187	0.2758	0.129644	0.185205	0.17101	0.20321	0.24275	0.343461	0.53129	0.200565	0.321787	0.438831	0.470361	0.448715	0.264437	0.399548	0.279503	0.0986777	0.264358	0.246656	0.365665	0.281322	0.356496	0.354039		0.957312	0.253893	0.230279	0.127836	0.578345	0.495203	0.259312
C043-JL-Ⅲ	0.55844	0.255685	0.281812	0.298048	0.231914	0.768518	0.541068	0	0.189412	0.229463	0.424524	0.383243	0.351768	0.471856	0.374485	0.518398	0.538918	0.378759	0.296442	0.0200134	0.209608	0.310352	0.443986	0.4997	0.469056	0.550314	0.433263	0.456231	0.470684	0.406216	0.487324	0.254265	0.300118	0.636958	0.656424	0.389227	0.344804	0.480139	0.350842	0.488324	0.471948	0.957312		0.235196	0.272335	0.400458	0.47807	0.472826	0.1777
C044-JL-Ⅲ	0.722876	0.661612	1.3165	0.352864	1.23515	0.414672	0.804244	0	0.172652	1.09654	0.681447	0.0999939	0.00360126	0.268463	0.693995	0.468221	0.272698	1.30217	0.937629	1.18437	1.16866	0.467633	0.44445	0.428238	0.462509	0.267419	0.653402	0.814878	0.424301	0.627834	0.579347	1.94275	0.665549	0.290031	0.305678	1.08395	0.70931	0.204662	0.551223	0.575934	0.334194	0.253893	0.235196		1.41252	0.291566	0.363158	0.269942	0.242396
C045-JL-Ⅱ	0.621365	0.661436	1.01076	0.403999	1.5994	0.376703	0.72036	0	0.0732898	1.3473	0.800399	0.269634	0.118898	0.384645	0.534095	0.446277	0.291884	1.12602	0.605183	0.824755	1.38348	0.496061	0.525682	0.462166	0.419752	0.189648	0.780952	0.636983	0.292302	0.432766	0.503879	1.41384	0.533857	0.332949	0.336143	0.960004	0.624758	0.272411	0.527163	0.626508	0.379598	0.230279	0.272335	1.41252		0.282543	0.353729	0.24374	0.132133
C046-JL-Ⅱ	0.483558	0.383825	0.420844	0.294172	0.284755	0.808669	0.781185	0	0.0987067	0.246485	0.430414	0.460863	0.43232	0.490595	0.672252	0.732535	0.364959	0.330279	0.270421	0	0.302954	0.667657	0.720201	0.531815	0.520077	0.62608	0.4635	0.583426	0.471887	0.573393	0.586941	0.287957	0.268679	0.315668	0.655467	0.419656	0.342909	0.35563	0.445889	0.631824	0.335718	0.127836	0.400458	0.291566	0.282543		0.51666	0.661775	0.365498
C047-JL-Ⅱ	1.10193	0.623458	0.746075	0.553728	0.438379	1.09361	0.70661	0.237297	0.356673	0.416899	0.658506	0.20367	0.243762	0.575965	0.836359	0.686334	0.52705	0.685022	0.478616	0.0102634	0.474861	0.570284	0.541008	0.523646	0.519001	0.57614	0.37131	0.708049	0.590683	0.593204	0.765547	0.357577	0.521323	0.486865	0.17215	0.397289	0.370047	0.641716	0.31152	0.678228	0.430804	0.578345	0.47807	0.363158	0.353729	0.51666		1.48672	0.493311
C048-JL-Ⅱ	1.33583	0.542805	0.565338	0.621004	0.379358	1.15227	0.651645	0.109826	0.299432	0.434438	0.631439	0.101926	0.17541	0.650366	0.833242	0.772108	0.451926	0.635101	0.356034	0	0.480995	0.618157	0.621731	0.498342	0.334771	0.73662	0.470416	0.712298	0.637161	0.43539	0.683937	0.265208	0.406391	0.373219	0.248013	0.688839	0.560695	0.536306	0.403096	0.722146	0.387679	0.495203	0.472826	0.269942	0.24374	0.661775	1.48672		0.689116
C049-JL-0	0.545827	0.327896	0.314515	0.298768	0.125603	0.289639	0.194267	0.165228	0.24612	0.21338	0.288945	0.0677743	0	0.308285	0.316198	0.346843	0.0503673	0.230311	0.386532	0.272197	0.194259	0.285048	0.39717	0.223379	0.0865077	0.423348	0.197456	0.307049	0.332874	0.202398	0.253064	0.240892	0.118122	0.118132	0.0852066	0.373752	0.369326	0.2649	0.153955	0.421572	0.185241	0.259312	0.1777	0.242396	0.132133	0.365498	0.493311	0.689116
C050-JL-Ⅱ	0.645302	0.694168	0.636401	0.229858	0.467119	0.874877	0.759735	0	0.0412878	0.505837	0.597725	0.389479	0.287617	0.534604	0.767688	0.87965	0.71105	0.422901	0.30348	0.0499451	0.524331	0.603923	0.627198	0.620287	0.468772	0.731541	0.717252	0.754045	0.634107	0.41045	0.540449	0.397574	0.587795	0.47926	0.341031	0.657867	0.490829	0.323636	0.511698	0.728238	0.409461	0.456214	0.537512	0.388437	0.395067	0.597703	0.580417	0.610641	0.192364
C051-JL-Ⅰ	0.398296	0.0369186	0.329434	0.479743	0.128659	0.76251	0.309744	0.350991	0.247465	0.0684225	0.330786	0.30042	0.351221	0.400884	0.297295	0.399828	0.248918	0.33922	0.224888	0.262701	0.00950261	0.24635	0.139747	0.225188	0.290829	0.384297	0.15472	0.335136	0.39245	0.465155	0.401401	0.0637526	0.53596	0.491242	0.000970197	0.0251121	0.0859573	0.522452	0.196917	0.326403	0.46195	0.669479	0.400196	0.0647376	0.0653221	0.202594	0.418147	0.396269	0.127483
C052-JL-Ⅲ	0.090531	0.326992	0.375872	0.234277	0.362907	0.279982	0.0911908	0	0	0.297285	0.330171	0.105667	0.202171	0.164155	0.345498	0.222091	0.0264696	0.329996	0.041919	0.114616	0.320444	0.218583	0.168354	0.114236	0.159437	0.05669	0.400067	0.412357	0.199055	0.0995029	0.158458	0.214839	0.362559	0.0312278	0.150579	0.342196	0.205128	0.0834793	0.240871	0.213959	0.10468	0.0261655	0.13487	0.217902	0.312373	0.0686435	0.185143	0.141408	0
C053-JL-Ⅰ	0.32203	0.115621	0.0477247	0.0878062	0.31699	0.105128	0.250737	0.250024	0.166653	0.343239	0.209363	0.320551	0	0.23116	0.097195	0	0.284457	0.125159	0.486903	0.446369	0.327363	0.0453841	0.195184	0.250304	0.179758	0	0	0.0762281	0	0.0980286	0.205428	0.212736	0.0793274	0.227286	0	0.0321968	0.199966	0.237174	0	0.31416	0.238078	0.0808487	0.0985108	0.20491	0.243218	0.0163243	0.338343	0.251124	0.522985
C054-JL-Ⅰ	0.194193	0.274917	0.469915	0.144565	0.647655	0	0.244455	0	0	0.593247	0.227702	0.0493669	0.11184	0.0957988	0.178739	0.0407035	0	0.452319	0.0616564	0.629692	0.628399	0.385134	0.418434	0.216498	0.222947	0.0629158	0.50858	0.264339	0.0579457	0.445521	0.208053	0.722656	0.467549	0	0.287826	0.985915	0.459338	0	0.455576	0.334896	0.146068	0	0.0344662	0.715657	0.764586	0.132631	0	0	0.114193
C055-JL-Ⅰ	0.7434	0.979909	0.891226	0.592108	0.82525	1.03221	0.834733	0	0.173749	0.829807	0.790148	0.322372	0.11665	0.490976	1.00488	0.842751	0.397143	0.931534	0.320631	0.424446	0.856742	0.60841	0.472321	0.475016	0.394661	0.550465	0.776067	1.06842	0.733812	0.59943	0.728843	0.784021	0.801125	0.362365	0.372571	1.13318	0.552504	0.473535	0.5692	0.615404	0.314065	0.386152	0.376782	0.769989	0.731028	0.551274	0.585085	0.558577	0.191235
C056-JL-Ⅱ	0.448056	0.623942	0.611409	0.366837	0.561402	0.640664	0.616347	0	0.114448	0.587029	0.541425	0.181113	0.142355	0.272803	0.644266	0.546493	0.204067	0.561646	0.275864	0.354139	0.599289	0.363373	0.31504	0.281021	0.302667	0.30601	0.495105	0.72252	0.441348	0.546346	0.563688	0.585508	0.539368	0.114975	0.20896	0.63938	0.313955	0.184988	0.377442	0.403128	0.18276	0.257938	0.245311	0.579376	0.513876	0.299713	0.310171	0.227011	0
C057-JL-Ⅰ	0.314819	0.309699	0.403886	0.111571	0.270305	0.438415	0.465761	0.0105312	0.156846	0.271425	0.327635	0.158247	0.213896	0.301382	0.307823	0.406624	0.260163	0.264474	0.404717	0.338286	0.262105	0.207638	0.277153	0.300017	0.379701	0.261463	0.208585	0.387035	0.297795	0.570276	0.468615	0.329482	0.38296	0.145419	0.1298	0.265315	0.189602	0.187803	0.257978	0.242844	0.220529	0.336821	0.275287	0.335717	0.249086	0.232048	0.265183	0.133755	0.0549798
C058-JL-Ⅰ	0.338588	0.374193	0.349431	0.254361	0.366442	0.277709	0.375518	0	0.0839953	0.397604	0.301789	0.374591	0.0646245	0.0790497	0.53594	0.393315	0.0558174	0.312852	0.0834375	0.292266	0.41635	0.22939	0.248146	0.202831	0.183926	0.0191555	0.433385	0.522223	0.163962	0.0467942	0.276402	0.433365	0.253714	0.215589	0.323777	0.457166	0.241368	0.406741	0.187986	0.178782	0.0535863	0	0.145139	0.440141	0.464372	0.439246	0.225366	0.148986	0.243736
C059-JL-Ⅱ	0.856973	0.645666	0.718877	0.489387	0.381151	1.15816	0.790717	0.131047	0.289506	0.350312	0.662672	0.320592	0.384812	0.532654	0.886278	0.927218	0.364036	0.649477	0.29163	0.0413055	0.328697	0.70552	0.498021	0.472459	0.376563	0.685794	0.43124	0.789682	0.70371	0.581022	0.707782	0.368937	0.675931	0.393639	0.308833	0.567508	0.358921	0.2691	0.447887	0.972161	0.526408	0.424892	0.408659	0.368285	0.300287	0.702658	0.811482	0.833734	0.17943
C060-JL-Ⅰ	0.473451	0.768528	0.312114	0.232064	0.398585	0.877136	0.798424	0	0.23979	0.389802	0.585132	0.423523	0.323387	0.523547	0.645785	0.667823	0.546431	0.479318	0.414123	0	0.422904	0.535926	0.721273	0.605457	0.522948	1.09007	0.319534	0.626964	0.810067	0.427756	0.607664	0.300543	0.264831	0.402507	0.532766	0.515087	0.352753	0.244075	0.428041	0.688705	0.438523	0.438088	0.510129	0.300914	0.328669	0.76089	0.616785	0.593295	0.20705
C061-JL-Ⅱ	0.650213	0.712475	0.797108	0.273831	1.16822	0.335334	0.749227	0	0	1.08025	0.652057	0.25308	0.0886531	0.336823	0.590407	0.473366	0.262681	0.918733	0.384552	0.650116	1.13903	0.642164	0.71049	0.511905	0.329634	0.396001	0.845163	0.676705	0.364775	0.489939	0.522359	1.23086	0.428028	0.250649	0.572034	1.59242	0.908637	0.124771	0.736795	0.57882	0.252082	0.0171669	0.241691	1.22599	1.27357	0.37155	0.166188	0.368366	0.213052
C062-JL-0	0.165536	0.53387	0.565742	0.271462	0.573118	0.384898	0.471252	0	0	0.528398	0.400018	0.293723	0.0900237	0.12729	0.706425	0.289135	0.141441	0.527677	0.247327	0.539626	0.548122	0.398761	0.346557	0.268115	0.33058	0.179314	0.625445	0.684835	0.355936	0.276683	0.344709	0.656079	0.462441	0.275573	0.291101	0.662769	0.3916	0.160117	0.394734	0.38797	0.263311	0.0914375	0.182672	0.656754	0.593912	0.275591	0.219146	0.213714	0.101733
C063-JL-Ⅰ	0.453166	0.747233	1.02639	0.498173	0.99403	0.756807	0.783462	0	0	0.849368	0.6843	0.307795	0.149949	0.343047	0.95285	0.610168	0.317801	0.850077	0.419303	0.564617	0.854544	0.686085	0.576855	0.4871	0.521627	0.390984	0.864867	1.0184	0.544225	0.582872	0.594421	0.999068	0.872918	0.409006	0.444496	0.896312	0.580957	0.331562	0.583702	0.788392	0.480853	0.25383	0.380935	1.00035	0.910538	0.53259	0.447188	0.396158	0.0769423
C064-JL-Ⅱ	0.812959	0.926692	1.04244	0.431441	0.909255	0.846081	0.835123	0	0.238399	0.827938	0.731186	0.193722	0.122759	0.481556	0.974694	0.74668	0.449903	1.02506	0.669906	0.686237	0.909425	0.548532	0.494172	0.494656	0.501517	0.570503	0.680821	1.0421	0.677585	0.617878	0.737974	1.2121	0.72662	0.382718	0.362611	1.04805	0.583224	0.363071	0.578482	0.538936	0.324447	0.330069	0.354829	1.22158	0.95055	0.49419	0.653108	0.59945	0.347921
C065-JL-Ⅱ	0.750605	0.648707	0.713386	0.39267	0.817092	0.684106	0.766668	0	0.103024	0.733217	0.650362	0.336712	0.17921	0.808838	0.602965	0.65914	0.425849	0.769024	0.497175	0.423836	0.763896	0.565269	0.645903	0.571474	0.442012	0.499893	0.595418	0.689254	0.508106	0.52135	0.624005	0.854279	0.493663	0.398676	0.467848	1.00379	0.616507	0.404494	0.560265	0.609981	0.359481	0.250199	0.383835	0.859724	0.857147	0.48425	0.452427	0.532495	0.299166
C066-JL-Ⅰ	0.651483	0.712317	0.79695	0.273775	1.1677	0.335243	0.748608	0	0	1.08097	0.652682	0.25323	0.0874951	0.334625	0.59033	0.47329	0.262945	0.919902	0.383577	0.650839	1.13976	0.639966	0.710332	0.511803	0.330079	0.397068	0.845087	0.676629	0.365842	0.489316	0.521718	1.23138	0.429196	0.250716	0.56998	1.5917	0.909282	0.123797	0.734078	0.576622	0.25206	0.0183354	0.242211	1.22324	1.27092	0.371473	0.167458	0.369535	0.213077
C067-JL-Ⅱ	0.13418	0.242181	0.190256	0	0.244187	0.241346	0.350913	0	0.038177	0.277757	0.236803	0.239061	0.196839	0.276271	0.242302	0.16629	0.256956	0.0975411	0.319693	0.277315	0.274845	0.221062	0.322612	0.291727	0.417773	0.155551	0.177139	0.154822	0.103489	0.294757	0.275058	0.182318	0.189431	0.135223	0.0875038	0.200795	0.212563	0.246363	0.237011	0.339409	0.269304	0.139231	0.190486	0.203101	0.19883	0.454936	0.288534	0.257391	0.380424
C068-JL-Ⅱ	0.209663	0.372292	0.311473	0.274929	0.205492	0.611242	0.442073	0	0.0307774	0.139988	0.402923	0.384689	0.307912	0.359405	0.499426	0.568944	0.233513	0.39096	0.181976	0.0899777	0.138394	0.441626	0.519205	0.282741	0.322225	0.451376	0.375118	0.487067	0.471922	0.353663	0.354528	0.255167	0.247789	0.095932	0.347829	0.322771	0.196185	0.0947895	0.417487	0.414959	0.206548	0.100264	0.226261	0.250801	0.162495	0.667226	0.237516	0.344254	0.246897
C069-JL-Ⅰ	0.96668	0.730712	0.713085	0.334347	0.749223	0.798425	0.952518	0	0.000388453	0.815545	0.683711	0.0333491	0.126144	0.337107	0.917406	0.763005	0.00419449	0.827043	0.307627	0.407528	0.832762	0.556292	0.659597	0.378008	0.375809	0.523454	0.999974	0.995512	0.599298	0.517664	0.734097	0.869502	0.460976	0.0553716	0.321623	1.1087	0.730867	0.252788	0.600201	0.700193	0.20035	0.272102	0.355039	0.881594	0.790006	0.466528	0.572827	0.772344	0.361089
C070-JL-Ⅰ	0.354118	0.511897	0.530288	0.331075	0.369909	1.01038	0.722931	0	0.0340384	0.288098	0.548771	0.339541	0.452226	0.505294	0.910745	0.804189	0.408995	0.438628	0.102133	0.0141716	0.281552	0.532307	0.430019	0.405179	0.475991	0.539237	0.673761	0.850502	0.648612	0.450597	0.6118	0.272086	0.672937	0.433319	0.416832	0.542295	0.267936	0.291662	0.480585	0.57165	0.367667	0.392261	0.501375	0.269617	0.295277	0.602466	0.610953	0.586595	0.0599762
C071-JL-Ⅱ	0.305092	0.641158	0.294846	0.00279351	0.372494	0.611043	0.543459	0	0.0864144	0.34204	0.384918	0.399883	0.448958	0.498452	0.526025	0.550759	0.490961	0.23698	0.301072	0.234402	0.320804	0.329242	0.402161	0.481583	0.4521	0.369472	0.350528	0.512316	0.389434	0.346433	0.399513	0.238961	0.463501	0.437905	0.298027	0.367243	0.265101	0.302496	0.412553	0.476973	0.396513	0.281362	0.33739	0.23104	0.298299	0.386493	0.3722	0.234988	0.00751996
C072-JL-Ⅰ	0.185078	0.0748808	0.16829	0	0.0857651	0.282873	0.282598	0	0	0.0480574	0.192347	0.350006	0.0379874	0.158344	0.227927	0.50424	0.137773	0.0673454	0.18025	0.153256	0.0032732	0.273071	0.383103	0.198904	0.139146	0.309515	0.353044	0.32179	0.324256	0.0998516	0.162938	0.14779	0.0939587	0.175444	0.361778	0.204778	0.257014	0.085435	0.245267	0.235135	0.114651	0	0.13658	0.152963	0.0495783	0.359891	0	0.0808168	0.256773
C073-JL-Ⅰ	0.207652	0.227314	0.534544	0.203802	0.677206	0	0.189148	0	0	0.626224	0.213982	0	0.0902482	0.106231	0.12893	0.00516266	0	0.493867	0.0932839	0.659403	0.657975	0.338971	0.349058	0.185071	0.190865	0.00172774	0.45951	0.216728	0.00666019	0.389889	0.149812	0.765613	0.469949	0	0.235792	0.953383	0.471744	0	0.428196	0.358862	0.171866	0.017449	0.0236001	0.760745	0.789278	0.12672	0	0	0.14197
C074-JL-Ⅰ	0.497073	0.50999	0.588515	0.284052	0.706796	0.0550125	0.260568	0	0.027741	0.755247	0.336919	0.0277969	0	0.214691	0.289201	0.22049	0.0534205	0.54825	0.221794	0.619252	0.764296	0.314465	0.262288	0.197707	0.103743	0.0988711	0.357192	0.338079	0.128348	0.247166	0.224585	0.759274	0.42255	0.030777	0.12944	0.94337	0.563458	0.0961122	0.376801	0.271748	0.110598	0.0947582	0.0583861	0.758472	0.702416	0.115789	0.126772	0.300473	0.438623
C075-JL-Ⅲ	0.879684	0.514285	0.560567	0.306834	0.619264	0.958247	0.995744	0	0.0462576	0.482868	0.697665	0.326934	0.344268	0.546836	0.764588	0.907264	0.280183	0.771189	0.387838	0.297361	0.474867	0.632194	0.818743	0.578985	0.594881	0.701976	0.914272	0.84906	0.681767	0.602213	0.746618	0.68176	0.434112	0.354863	0.579033	0.936722	0.611549	0.251147	0.611833	0.768516	0.384029	0.344739	0.520286	0.682716	0.702156	0.686343	0.608345	0.785122	0.320817
C076-JL-Ⅰ	0.589932	0.867382	0.746125	0.721133	0.641382	0.772981	0.586582	0	0.0298632	0.703497	0.666903	0	0.181505	0.349951	0.865293	0.595576	0.273653	0.722125	0.413005	0.255864	0.704778	0.415189	0.300124	0.272841	0.291447	0.373649	0.538935	0.861341	0.507106	0.303642	0.53848	0.556947	0.586786	0.116633	0.158733	0.669308	0.362114	0.290828	0.418081	0.431182	0.149036	0.211563	0.244056	0.562716	0.502973	0.3545	0.679898	0.722196	0.254136
C077-JL-Ⅱ	0.453432	0.913056	1.00221	0.423564	1.16164	0.609028	0.880491	0	0	1.05333	0.749783	0.171144	0.129245	0.383054	0.825251	0.529699	0.383859	0.98134	0.564507	0.666637	1.1019	0.611646	0.594857	0.4905	0.545001	0.466544	0.817029	0.917305	0.582958	0.480231	0.6254	1.16748	0.705338	0.283012	0.311439	1.11139	0.697623	0.221245	0.736129	0.625779	0.328429	0.0934571	0.22854	1.16794	1.10698	0.37686	0.35682	0.384729	0.202979
C078-JL-Ⅰ	0.272474	0	0.15387	0.203607	0.209909	0.169888	0.23636	0.197433	0.161878	0.234276	0.21737	0.169392	0.297831	0.288023	0	0.0383291	0.229394	0.192755	0.824432	0.40038	0.233907	0.0197609	0.25458	0.24977	0.330203	0.220786	0	0	0.0749594	0.324589	0.223876	0.219509	0.0859868	0.170948	0	0	0.169771	0.154231	0.0879609	0.22861	0.298904	0.356304	0.188041	0.212604	0.184688	0.0346473	0.203539	0.159578	0.171115
C079-JL-Ⅱ	0	0.00134705	0.161451	0.256653	0	0	0	0.108306	0.0283457	0	0	0	0	0	0	0	0	0.147929	0.0122723	0.0364701	0	0	0	0	0	0	0	0	0.043311	0	0	0.0434768	0.0768571	0	0	0	0	0	0	0	0	0.165157	0	0.0395866	0	0	0	0	0.0664528
C080-JL-Ⅱ	0.566816	0.6876	1.0981	0.399383	1.03421	0.4453	0.710347	0	0.101448	1.0052	0.650069	0.163294	0.0561111	0.31589	0.723148	0.523595	0.401322	0.947798	0.732592	0.878342	1.02966	0.44996	0.36008	0.455426	0.394151	0.225116	0.483554	0.762922	0.398074	0.498575	0.444434	1.35813	0.738016	0.386308	0.247186	0.794127	0.540907	0.342176	0.441666	0.473241	0.344606	0.29631	0.227007	1.35933	1.03298	0.316054	0.41997	0.327882	0.217613
C081-JL-Ⅱ	0.563038	0.683054	1.09737	0.395843	1.0348	0.449807	0.717374	0	0.0950237	1.00635	0.650404	0.160269	0.0593538	0.317118	0.724816	0.517419	0.399865	0.948052	0.727707	0.87779	1.03505	0.450224	0.358274	0.455564	0.39491	0.229725	0.486347	0.762455	0.398704	0.503912	0.449197	1.35353	0.732322	0.383317	0.247058	0.796484	0.541099	0.34003	0.443294	0.475237	0.346681	0.293085	0.227081	1.35608	1.03769	0.32331	0.414224	0.329949	0.218449
C082-JL-Ⅱ	0.434237	0.610702	0.984207	0.402818	0.991617	0.559405	0.750943	0	0	0.97365	0.624152	0.0818373	0.0400517	0.350528	0.704254	0.510019	0.319279	0.847595	0.530913	0.642924	0.967385	0.434889	0.395289	0.419693	0.384113	0.308049	0.578376	0.780877	0.478467	0.485366	0.490124	1.04261	0.656369	0.326165	0.293999	0.611466	0.464305	0.408207	0.370749	0.661787	0.418722	0.391809	0.348354	1.03196	0.960562	0.360778	0.351083	0.337541	0.208066
C083-JL-Ⅰ	0.40638	0.420914	0.596644	0.138789	0.489704	0.542595	0.571187	0	0.0924749	0.468074	0.473424	0.188626	0.152047	0.434146	0.411284	0.490693	0.344961	0.462042	0.494724	0.441786	0.454029	0.308344	0.377454	0.42397	0.454687	0.316323	0.336044	0.474818	0.432736	0.51936	0.490934	0.503736	0.434341	0.295926	0.216101	0.398779	0.35335	0.36276	0.307178	0.375799	0.371293	0.389752	0.332414	0.509572	0.454252	0.339412	0.360506	0.304433	0.218554
C084-JL-0	0.438337	0.196789	0.149922	0.185889	0.20544	0.191091	0.260454	0.0272637	0.0981996	0.280462	0.266987	0.1508	0	0.26403	0.190466	0.216898	0.0123647	0.120134	0.371559	0.224565	0.230445	0.24191	0.440963	0.228748	0.119102	0.283725	0.253447	0.180576	0.189837	0.115279	0.222843	0.190148	0	0.109352	0.120104	0.235657	0.346871	0.24689	0.111172	0.488989	0.214128	0.118238	0.14488	0.194229	0.178878	0.41056	0.35977	0.581447	1.78673
C085-JL-Ⅱ	0.517827	0.192238	0.295645	0.507468	0.0411511	0.785052	0.32135	0.28791	0.268754	0.0334779	0.38747	0.296178	0.279005	0.371703	0.432476	0.412771	0.140984	0.337897	0.307235	0.0569455	0.0127106	0.287597	0.240039	0.193732	0.305665	0.373386	0.190247	0.446348	0.362862	0.431828	0.45572	0	0.2837	0.291273	0	0.0889749	0.0992144	0.390344	0.191637	0.372712	0.327692	0.609904	0.354817	0.015982	0.0028946	0.261926	0.622512	0.50565	0.225643
C086-JL-Ⅰ	0.141037	0.352347	0.292542	0.317769	0.0938576	0.154856	0	0.0225945	0.120988	0.162026	0.123795	0	0	0.0599437	0.323248	0.195239	0.120388	0.260451	0.211474	0.207171	0.147092	0.0926486	0	0	0	0.163556	0	0.299502	0.268454	0	0.00566979	0.161764	0.237205	0.082388	0.0119127	0.150663	0.0719166	0.223396	0.0622123	0	0	0.215421	0.0277432	0.159389	0.0711604	0.0869894	0.222359	0.137024	0.327647
C087-HLJ-Ⅰ	0.471974	0.288308	0.261726	0.243357	0.0315439	0.612115	0.418953	0.182991	0.307754	0.0866596	0.322646	0.38322	0.0976693	0.365276	0.434619	0.467714	0.272933	0.169471	0.476069	0.188156	0.0484667	0.236715	0.293073	0.37635	0.329475	0.343159	0	0.428174	0.423529	0.246709	0.42052	0.132642	0.320892	0.423274	0.176514	0.154415	0.120005	0.605597	0.128166	0.18825	0.15225	0.323513	0.309478	0.130169	0	0.419153	0.637124	0.53036	0.666158
C088-HLJ-000	0.27241	0.0955662	0.0083518	0.112635	0.032231	0.230215	0.182814	0.0598523	0.129557	0.115168	0.171533	0.299913	0.0559069	0.219483	0.0604683	0.24639	0.168178	0.0640826	0.356332	0.190154	0.0890304	0.130364	0.311216	0.225916	0.233273	0.18417	0	0.0461353	0.145206	0.0801245	0.185438	0	0	0.155055	0.0835097	0.0279537	0.192184	0.241229	0.0528861	0.106786	0.114396	0.086658	0.123103	0	0	0.272377	0.255275	0.261164	0.477152
C089-HLJ-00	0.0133646	0.0922921	0.012455	0.037204	0.0418913	0.255734	0.287666	0	0.100924	0.070671	0.155193	0.366173	0.011977	0.0988661	0.149076	0.19203	0.138705	0.0676075	0.20791	0.2456	0.0496285	0.113888	0.266751	0.195458	0.293477	0.0790731	0.0969627	0.110383	0.122869	0.133593	0.228426	0.00516517	0	0.118615	0.152368	0	0.092977	0.249028	0.00535456	0.0756607	0.0755324	0.0252394	0.115011	0	0.0080979	0.322898	0.110645	0.00511197	0.274066
C090-HLJ-Ⅰ	0	0.312069	0.383531	0.526636	0.435834	0	0.0434006	0	0	0.514059	0.201518	0	0.124617	0.0707676	0.210862	0	0.148219	0.277468	0.29569	0.465495	0.483472	0.157877	0.0515737	0.070171	0.149178	0	0.175921	0.265936	0	0	0.00168975	0.337123	0.31779	0.073335	0	0.19913	0.242102	0.133521	0.163357	0.0934725	0.069297	0.151893	0.0117636	0.34775	0.364801	0.0369646	0.00575394	0	0.180308
C091-HLJ-00	0.298014	0	0.042884	0.0721145	0.0700416	0.160258	0.199503	0.0515487	0.0830302	0.124453	0.128333	0.215989	0	0.280367	0.0192118	0.162375	0.210516	0.0858236	0.39764	0.319812	0.117578	0.0700761	0.311261	0.273473	0.238127	0.138763	0.0135765	0.0407005	0.0728478	0.0431967	0.183262	0.0746208	0	0.260886	0.0502768	0	0.178346	0.271547	0	0.188971	0.216314	0.0733593	0.153715	0.0689081	0.0710439	0.177828	0.204872	0.21168	0.4702
C092-HLJ-0	0.222536	0.496991	0.525319	0.484159	0.394215	0.122096	0.0354325	0	0.0519274	0.536076	0.241614	0.0135874	0	0.0862123	0.305872	0.19159	0.212043	0.407722	0.277064	0.55362	0.504791	0.0836221	0	0.0669127	0.0515917	0	0.133175	0.381383	0.12227	0.077232	0.0651726	0.407726	0.386262	0.312419	0	0.325572	0.291277	0.42212	0.127021	0.0423174	0.138412	0.343895	0.0839299	0.408069	0.316978	0	0.0810197	0.105835	0.37953
C093-HLJ-Ⅰ	0.545653	0.265386	0.371819	0.241515	0.454114	0.304731	0.402134	0	0.11313	0.446102	0.318379	0.354638	0.080127	0.45562	0.239804	0.308303	0.45295	0.202292	0.632056	0.379391	0.444571	0.229683	0.491553	0.543656	0.321285	0.187275	0.175157	0.286357	0.175224	0.11843	0.319275	0.36856	0.237785	0.495694	0.0786704	0.18097	0.414271	0.570195	0.137527	0.583319	0.50565	0.17841	0.259491	0.377554	0.416027	0.211378	0.392713	0.281175	0.599917
C094-HLJ-0	0.463383	0.199001	0.205558	0.299914	0.235852	0.510181	0.375605	0.140882	0.209738	0.281634	0.288681	0.149253	0.222261	0.317705	0.245556	0.315341	0.4095	0.243642	0.475994	0.18778	0.257341	0.138901	0.282559	0.365641	0.280432	0.321014	0.090692	0.298618	0.281809	0.203413	0.336759	0.150261	0.199714	0.583474	0.0760966	0.0770562	0.292795	0.59979	0.119594	0.388213	0.380522	0.364624	0.29432	0.145872	0.149428	0.136654	0.415507	0.360095	0.331986
C095-HLJ-Ⅱ	0.173632	0	0.109193	0	0.218327	0	0.00922277	0	0	0.16638	0.0534222	0	0	0.0748947	0.000913203	0.129747	0.0285682	0.121133	0.256607	0.243145	0.154571	0.0578816	0.150384	0.0548212	0	0	0.1258	0.0674781	0.0271259	0	0	0.206187	0	0.117914	0	0.057234	0.195154	0.198578	0	0	0	0	0	0.217675	0.159021	0.0536263	0	0.0315388	0.217506
C096-HLJ-0	0.493358	0.499283	0.422747	0.411508	0.440638	0.5103	0.51864	0	0.177281	0.471327	0.47495	0.191631	0.26656	0.394738	0.42462	0.497206	0.166567	0.401439	0.499026	0.257813	0.458441	0.317302	0.414982	0.299887	0.312141	0.215572	0.234039	0.486351	0.30593	0.376344	0.475314	0.371762	0.340972	0.130801	0.237162	0.474377	0.363499	0.334497	0.378436	0.380188	0.200984	0.185045	0.251821	0.384658	0.36824	0.425498	0.454111	0.434596	0.398679
C097-HLJ-Ⅰ	0.433407	0.308823	0.311133	0.197976	0.256647	0.482436	0.344193	0	0.107592	0.21639	0.37086	0.0997412	0.066745	0.389904	0.362714	0.437353	0.297493	0.341603	0.361506	0.171263	0.22484	0.291119	0.371664	0.345161	0.215106	0.280303	0.250549	0.389726	0.347727	0.190193	0.326232	0.228641	0.189652	0.302567	0.142613	0.274093	0.284387	0.364176	0.209809	0.271032	0.216837	0.141719	0.221377	0.224118	0.21445	0.329517	0.37209	0.367054	0.188592
C098-HLJ-000	0.613094	0.212247	0.189101	0.297122	0.107289	0.266649	0.138806	0.0820416	0.221295	0.193813	0.181977	0.170596	0	0.428451	0.0473195	0.347074	0.168635	0.179832	0.533813	0.154464	0.1518	0.177393	0.28641	0.239048	0.0539505	0.295758	0	0.0655755	0.214333	0.0753009	0.151173	0.0690113	0	0.183024	0.032614	0.246662	0.384426	0.236585	0.112897	0.256685	0.165996	0.198804	0.149144	0.0735126	0	0.332361	0.411283	0.549057	0.90767
C099-HLJ-0	0.185103	0.305602	0.0923016	0.11583	0.0516465	0.351612	0.213246	0.0979874	0.235171	0.140505	0.196783	0.414389	0.144692	0.144144	0.242025	0.254545	0.247474	0.0332491	0.350784	0.244782	0.0903166	0.146061	0.242669	0.248695	0.278934	0.258607	0	0.216109	0.260221	0.145876	0.226318	0	0.0837769	0.279925	0.166296	0.0720033	0.130914	0.314685	0.122727	0.195664	0.20211	0.173682	0.12886	0	0	0.30512	0.33895	0.219151	0.496848
C100-HLJ-Ⅰ	0.783418	0.438378	0.430626	0.300016	0.417529	1.14845	1.00412	0	0.087127	0.394279	0.654435	0.452605	0.453392	0.473954	0.795252	0.796224	0.498691	0.579988	0.361792	0.131132	0.427452	0.45863	0.623177	0.590882	0.575357	0.666773	0.707545	0.858392	0.705881	0.560765	0.774414	0.473423	0.332631	0.624018	0.650361	0.66274	0.391188	0.530413	0.483084	0.700343	0.502966	0.358832	0.590764	0.476115	0.462463	0.722191	0.61407	0.586539	0.0856942
C101-HLJ-0	0.245341	0.0206795	0	0.331809	0.0446568	0.328625	0.165861	0.0755405	0.0865749	0.119488	0.141268	0.148867	0.293362	0.206816	0	0.116005	0.33141	0	0.334312	0.0229492	0.0819753	0.0565261	0.17714	0.209018	0.249821	0.173959	0.00557478	0.028415	0.0938284	0	0.11123	0	0.092698	0.429529	0.0160751	0	0.190829	0.4163	0.0554156	0.171109	0.240086	0.216399	0.198664	0	0	0.116485	0.177927	0.215825	0.101073
C102-HLJ-00	0.0170742	0.116488	0.0288999	0	0.0755025	0.217443	0.225407	0	0	0.0559199	0.181882	0.238951	0.0105886	0.0894714	0.190123	0.229201	0.00320456	0.108156	0.114455	0.222834	0.0319071	0.137014	0.249711	0.106017	0.150093	0.126285	0.177228	0.20236	0.214038	0.118607	0.189868	0.0537855	0.00790624	0.0288676	0.158072	0.078996	0.129592	0.0648045	0.0776167	0.115565	0.0845451	0	0.0881942	0.0491922	0.0609309	0.226465	0.0290947	0.0180972	0.24058
C103-HLJ-00	0.288549	0.127244	0.0621809	0.0292661	0.131649	0.170141	0.190348	0	0.0497678	0.244011	0.134003	0.193849	0.171563	0.242901	0.0705283	0.176884	0.112226	0.00623892	0.395097	0.315957	0.21988	0.128482	0.305	0.219562	0.159796	0.154951	0.0190934	0.0675738	0.0674444	0.00821885	0.0726417	0.0441438	0.0637684	0.122203	0.116786	0.186356	0.340457	0.182816	0.184638	0.235082	0.173728	0.0374641	0.113552	0.0416421	0.0404944	0.298265	0.17124	0.370656	0.597232
C104-HLJ-0	0.277829	0.173366	0.124848	0.28301	0.271346	0.57869	0.535151	0.099383	0.195279	0.297633	0.350752	0.404619	0.27186	0.36551	0.194555	0.353427	0.542902	0.268532	0.341032	0.193228	0.246295	0.235599	0.345071	0.425699	0.440239	0.318749	0.0895994	0.232621	0.221122	0.349069	0.395886	0.126133	0.249721	0.664226	0.28525	0.0829533	0.2851	0.531808	0.194307	0.359118	0.426092	0.240019	0.328478	0.119394	0.168485	0.376874	0.258028	0.254566	0.0888718
C105-HLJ-0	0.721642	0.300202	0.301214	0.384967	0.404287	0.899069	0.739597	0	0.183482	0.489333	0.506709	0.293484	0.477889	0.501599	0.458576	0.652805	0.534132	0.385027	0.597115	0.12962	0.459229	0.244596	0.44442	0.548015	0.492377	0.439589	0.297608	0.529911	0.438733	0.322986	0.575134	0.268758	0.263839	0.761444	0.322343	0.229761	0.450491	0.812025	0.303353	0.605864	0.513903	0.402637	0.46301	0.269637	0.294041	0.52146	0.633306	0.61585	0.243968
C106-HLJ-0	0.335309	0.156907	0.0129563	0.284337	0.182737	0.358142	0.370859	0	0.174023	0.314368	0.253467	0.371576	0.302373	0.330367	0.0196384	0.258308	0.469457	0.12836	0.523797	0.159176	0.275026	0.0788525	0.294779	0.354831	0.397357	0.171142	0	0.100179	0.0857593	0.176327	0.298193	0.0442858	0.0132778	0.570865	0.246228	0	0.322208	0.61199	0.143612	0.22233	0.313342	0.258279	0.289422	0.045165	0.0961269	0.368915	0.260522	0.268278	0.178195
C107-HLJ-0	0.480812	0.424764	0.24887	0.142357	0.127878	0.576489	0.441022	0.203904	0.362073	0.194878	0.325458	0.505603	0.268326	0.429931	0.349165	0.559277	0.392782	0.19374	0.476127	0.356645	0.148441	0.252499	0.329813	0.428961	0.409159	0.321269	0	0.33576	0.36217	0.406204	0.41997	0.0954126	0.356069	0.475804	0.20533	0.224039	0.207536	0.531018	0.254446	0.1657	0.26197	0.345942	0.314417	0.0939494	0.0760884	0.413571	0.549277	0.340391	0.393673
C108-HLJ-Ⅰ	0.306212	0	0.0659172	0.101986	0.120767	0.183087	0.24238	0.208251	0.171068	0.202475	0.177338	0.213932	0.19288	0.341224	0	0.157074	0.24526	0.110923	0.898775	0.716703	0.172538	0	0.180237	0.27991	0.308581	0.204914	0	0.00808957	0.121439	0.271812	0.249903	0.0801578	0.0384228	0.343778	0.00178189	0	0.195757	0.348712	0.0524639	0.200192	0.324784	0.241444	0.168009	0.0817668	0.0535839	0	0.251847	0.189785	0.42443
C109-HLJ-Ⅰ	0.190863	0.366467	0.430731	0.523941	0.365661	0.16077	0.0915627	0.0251494	0.107407	0.424626	0.278352	0	0.0823991	0.188132	0.216345	0.125758	0.266389	0.354547	0.399237	0.345778	0.399115	0.159787	0.11852	0.17087	0.109474	0.151135	0.10664	0.289364	0.178243	0.175997	0.150167	0.323712	0.269368	0.119826	0	0.224141	0.227919	0.136378	0.163091	0.217857	0.161144	0.424271	0.161101	0.332959	0.301684	0	0.208703	0.161428	0.48515
C110-HLJ-0	0.333239	0.154799	0.0108481	0.282005	0.185225	0.35612	0.368527	0	0.174411	0.317119	0.253676	0.369417	0.305519	0.329231	0.0172155	0.256013	0.472228	0.1262	0.526679	0.162321	0.277685	0.0767442	0.292356	0.355081	0.395425	0.173892	0	0.0977563	0.0861469	0.174305	0.297731	0.0469456	0.0116955	0.573636	0.249019	0	0.322145	0.609882	0.146636	0.225212	0.31627	0.257537	0.287813	0.0476527	0.0986146	0.366583	0.260003	0.266256	0.180906
C111-HLJ-0	0.21989	0.103953	0.0479194	0.0582594	0.062283	0.199165	0.172649	0.203169	0.219294	0.113522	0.144836	0.176603	0.0325287	0.193029	0.0527786	0.0722543	0.179476	0.055418	0.348524	0.27014	0.0915862	0.0599649	0.215259	0.22579	0.2094	0.177684	0	0.0713596	0.12883	0.139836	0.191042	0.0120194	0.0854692	0.281974	0	0	0.12424	0.345012	0	0.200774	0.210331	0.261993	0.171988	0.00229278	0.00834219	0.102335	0.284988	0.172249	0.428034
C112-HLJ-0	0.198083	0.0195759	0.0897879	0.128138	0.132613	0.0774368	0.0489832	0.174688	0.15791	0.147726	0.0873108	0.115219	0	0.133734	0.00990092	0	0.33039	0.0888272	0.39009	0.318167	0.14303	0.0149459	0.200013	0.243874	0.16847	0.136193	0	0.0669964	0.0732319	0.0387675	0.084994	0.102378	0.0854706	0.460338	0	0	0.197654	0.438779	0	0.239908	0.290287	0.303132	0.144697	0.0919386	0.0880907	0	0.17659	0.0880769	0.427864
C113-HLJ-0	0.30483	0.410487	0.314233	0.227543	0.361081	0.329285	0.335365	0	0.110342	0.411562	0.334079	0.317387	0.13833	0.223641	0.378985	0.312477	0.142401	0.234945	0.403627	0.338714	0.388717	0.223579	0.295044	0.241836	0.237075	0.0918077	0.168813	0.369539	0.209168	0.162001	0.271483	0.256209	0.211043	0.169132	0.153021	0.301963	0.254609	0.310017	0.235259	0.258724	0.152042	0.062609	0.116993	0.259959	0.286163	0.318068	0.359629	0.263262	0.423287
C114-HLJ-Ⅰ	0.70303	0.316435	0.324064	0.195411	0.291186	0.535248	0.379346	0.208885	0.227182	0.272653	0.422847	0.167819	0.156271	0.654764	0.186807	0.618756	0.394672	0.436869	0.493535	0.340636	0.211476	0.271135	0.424338	0.44787	0.325765	0.485741	0.115652	0.274523	0.402877	0.410146	0.404591	0.234514	0.377845	0.596005	0.177008	0.326583	0.410168	0.553809	0.220071	0.344854	0.409102	0.358727	0.364825	0.231196	0.220111	0.233126	0.508331	0.576218	0.598716
C115-HLJ-00	0	0	0	0.0410486	0.0708876	0	0	0.142012	0.0886951	0.0996234	0	0.147933	0.247465	0	0	0	0.221369	0	0.11711	0.157139	0.0792892	0	0	0.108934	0.0591237	0	0	0	0	0.0707396	0	0	0.0583138	0.380857	0.0660521	0	0.145339	0.419226	0	0.237973	0.377477	0.247721	0.151358	0	0.0349653	0	0	0	0.151225
C116-HLJ-00	0.323526	0.0901384	0.189956	0.35825	0.0878503	0.440545	0.203134	0.221323	0.187466	0.126217	0.237991	0.342257	0.112204	0.327913	0.163892	0.213482	0.380172	0.246804	0.437161	0.277973	0.0820899	0.138106	0.169317	0.241527	0.193201	0.22791	0	0.177961	0.231852	0.230353	0.24851	0.0304216	0.171375	0.437029	0.0739991	0	0.153169	0.447063	0.0941319	0.260881	0.331517	0.386093	0.205816	0.031258	0.0187033	0.176776	0.420949	0.348597	0.390888
C117-HLJ-Ⅰ	0.498498	0.380587	0.46234	0.471138	0.242823	0.658349	0.416881	0.14255	0.260642	0.275895	0.449538	0.196014	0.281343	0.499986	0.361677	0.451675	0.555534	0.53947	0.555661	0.281187	0.259113	0.277705	0.310155	0.460533	0.305444	0.517015	0.136242	0.401229	0.460303	0.385212	0.452298	0.254941	0.513332	0.633231	0.262234	0.277332	0.236805	0.495394	0.271683	0.431034	0.503816	0.529225	0.462036	0.236075	0.209153	0.239712	0.565935	0.514964	0.347575
C118-HLJ-00	0.30266	0.233449	0.164263	0.0238131	0.05129	0.274041	0.155077	0	0.140539	0.143342	0.18614	0	0.175215	0.170104	0.106772	0.386921	0.0640887	0.0827344	0.366581	0.308026	0.0689409	0.186282	0.342797	0.226413	0.240202	0.408193	0.107278	0.228714	0.306137	0.296175	0.22866	0.127246	0.179935	0.0185086	0.156587	0.223874	0.208632	0.0591003	0.237833	0.298402	0.196622	0.29744	0.19496	0.129491	0.0532345	0.282576	0.139969	0.210414	0.405244
C119-HLJ-00	0.0802179	0.128587	0.0997	0.188325	0.0735741	0.0811482	0.0259018	0.132379	0.0665036	0.0746364	0.100132	0	0.0163922	0.152538	0.09428	0.0769492	0.0624395	0.112236	0.129113	0.115804	0.0635834	0.117653	0.128998	0.087133	0.047866	0.100508	0	0.0627904	0.0646131	0.104742	0.0401745	0.0185469	0.164664	0.0722172	0	0.0212566	0.0882499	0.135464	0.0605875	0.0969702	0.122495	0.152639	0.0437803	0.0201538	0.0280651	0.102424	0.135893	0.176934	0.228857
C120-HLJ-000	0.198158	0	0.0208242	0	0.0254237	0	0	0	0	0.0531884	0	0	0.0268547	0.124358	0	0	0.0914022	0	0.271902	0.30667	0.0506494	0.0294892	0.247332	0.195429	0.186476	0.113738	0	0	0.00460241	0.0463642	0	0.0371831	0.0755025	0.202828	0.0275027	0.0442013	0.220899	0.171323	0.0425304	0.297298	0.343152	0.184598	0.147566	0.0473555	0.0121182	0.0820667	0.0397301	0.172509	0.407388
C121-HLJ-00	0.490627	0.0984378	0.0477209	0.224767	0.243113	0.282733	0.346189	0	0.186941	0.37301	0.229647	0.30654	0.138102	0.328318	0	0.217505	0.488192	0.204347	0.416093	0.240176	0.343725	0.0268026	0.255888	0.385103	0.410234	0.139922	0	0.0113078	0	0.183824	0.315713	0.169946	0	0.632986	0.214217	0.0281362	0.329701	0.748639	0.06369	0.256446	0.384673	0.330684	0.307917	0.166017	0.201825	0.370847	0.356935	0.351751	0.307568
C122-HLJ-Ⅰ	0.232742	0.331808	0.482298	0.279451	0.469443	0.260305	0.214537	0	0	0.407081	0.295325	0.158019	0.0556087	0.237933	0.424895	0.317723	0.33652	0.310137	0.250169	0.482882	0.405406	0.187707	0.253265	0.309055	0.311557	0.151024	0.359593	0.436543	0.2465	0.223193	0.189395	0.426302	0.453921	0.246247	0	0.209727	0.210941	0.161027	0.14298	0.395636	0.345552	0.177871	0.148236	0.43423	0.436343	0.11624	0.157671	0.0863055	0.206201
C123-HLJ-0	0.389653	0.308692	0.162892	0.320598	0.129368	0.474293	0.311356	0.105584	0.278037	0.252434	0.290431	0.322633	0.20166	0.346946	0.107953	0.378926	0.465775	0.179638	0.437499	0.136306	0.206156	0.120864	0.233545	0.344974	0.3287	0.310841	0	0.165321	0.225879	0.242003	0.331089	0	0.165806	0.605193	0.220435	0.033945	0.262699	0.678484	0.126893	0.212019	0.330015	0.396299	0.283097	0	0.0279532	0.315086	0.432066	0.361809	0.302134
C124-HLJ-0	0.33828	0.117579	0	0.140942	0.0872456	0.320675	0.295061	0.00128184	0.144812	0.20613	0.210992	0.262738	0.273815	0.329905	0.00523849	0.302126	0.232232	0.048908	0.453919	0.128967	0.172279	0.140535	0.340525	0.290686	0.26668	0.241428	0	0.0234161	0.141354	0.154856	0.237059	0	0	0.281935	0.19675	0.0571279	0.306368	0.32739	0.16898	0.177476	0.230056	0.116153	0.182773	0	0	0.384462	0.254108	0.345181	0.324602
C125-HLJ-00	0.14311	0.105539	0.183247	0.214153	0.272847	0.0840417	0.156084	0	0	0.282407	0.15784	0.0965411	0.0949672	0.192642	0.065631	0.0756554	0.146901	0.192907	0.406713	0.400781	0.271216	0.0519514	0.213074	0.196962	0.158008	0.0985985	0.0550204	0.136899	0.0759504	0.1016	0.0987569	0.240299	0.0890881	0.257978	0.0681294	0.0421485	0.232263	0.329759	0.0996047	0.271128	0.266807	0.117316	0.0972699	0.241857	0.254571	0.182372	0.12638	0.107403	0.280207
C126-HLJ-0	0.276372	0.0935256	0.068086	0.253572	0.134148	0.210559	0.169747	0.150498	0.210406	0.209923	0.165123	0.191995	0.126857	0.213724	0.0031726	0.11599	0.356146	0.114497	0.440945	0.226514	0.184352	0.0638424	0.220583	0.270796	0.239966	0.146251	0	0.0740667	0.0762313	0.114774	0.170922	0.0566627	0.0866564	0.478037	0.0329079	0	0.241219	0.499943	0.034439	0.189594	0.274558	0.303649	0.201424	0.0529976	0.0689548	0.0957002	0.219893	0.182593	0.321072
C127-HLJ-0	0.311101	0.117438	0.0102495	0.250488	0.157636	0.321399	0.342453	0	0.157478	0.288045	0.2301	0.335707	0.297163	0.295969	0	0.233465	0.419668	0.097473	0.526651	0.163528	0.249374	0.0808132	0.302309	0.338096	0.399934	0.141692	0	0.0631943	0.0748258	0.161839	0.264778	0.0184395	0	0.522134	0.193722	0	0.325753	0.572626	0.14119	0.196364	0.306933	0.248963	0.26114	0.0189228	0.0711828	0.320082	0.21347	0.232115	0.199314
C128-HLJ-Ⅰ	0.359033	0.38588	0.34696	0.21981	0.3873	0.24309	0.34378	0	0.0907895	0.418448	0.29538	0.387866	0.0898987	0.0609241	0.524551	0.416508	0.0716505	0.311641	0.105981	0.314934	0.435417	0.225857	0.232235	0.209685	0.154217	0.0359728	0.399986	0.508594	0.170052	0.0081653	0.24204	0.458703	0.231036	0.233769	0.315101	0.451574	0.256315	0.368494	0.19724	0.145636	0.0513467	0	0.133132	0.465255	0.48327	0.397806	0.189265	0.115771	0.203359
C129-HLJ-0	0.538448	0.0922132	0	0.136143	0.0191066	0.283003	0.143405	0.394383	0.257223	0.0663525	0.197285	0.191882	0.0523393	0.385772	0.0299308	0.310529	0.182382	0.0880303	0.28152	0.158005	0.0102959	0.141429	0.337044	0.273318	0.245567	0.355156	0	0.0275957	0.178229	0.31387	0.271345	0	0.067198	0.284236	0	0.0665799	0.174784	0.344865	0.0273501	0.110792	0.196968	0.46099	0.302921	0	0	0.123964	0.455613	0.618382	0.669913
C130-HLJ-0	0.426709	0.0280991	0.120786	0.0889385	0.200494	0.262552	0.341322	0.0216557	0.145488	0.289819	0.188175	0.25982	0.0473154	0.230802	0.0317195	0.113296	0.346782	0.196355	0.361388	0.328175	0.262125	0.00144892	0.207066	0.290018	0.366569	0.0645449	0	0.0644495	0	0.22719	0.300549	0.188767	0	0.473238	0.0366963	0.00670161	0.279873	0.658652	0.0466998	0.31506	0.376092	0.373229	0.232278	0.191242	0.21207	0.221886	0.274157	0.230796	0.295837
C131-HLJ-000	0.261251	0.234871	0	0.147827	0.136927	0.423729	0.377495	0	0.192781	0.186327	0.283535	0.341189	0.543174	0.358774	0.12022	0.325767	0.430936	0.0940451	0.439914	0.126028	0.126679	0.171915	0.473425	0.471031	0.403538	0.213905	0.0720924	0.189544	0.218524	0.260991	0.309386	0.0339481	0.158864	0.587446	0.319806	0.0254628	0.25864	0.476369	0.293563	0.26486	0.371528	0.172523	0.285526	0.03698	0.0895345	0.289433	0.268203	0.122735	0.1307
C132-HLJ-00	0.305553	0.307561	0.32931	0.353579	0.359782	0.151148	0.167268	0	0.0314773	0.449956	0.287771	0.067535	0.0324396	0.19402	0.142218	0.185865	0.255266	0.313652	0.326693	0.252661	0.434194	0.152298	0.170406	0.227319	0.107167	0.0901309	0.154148	0.222237	0.106476	0.0316132	0.132973	0.33235	0.105353	0.281229	0.115502	0.241289	0.403453	0.37382	0.121342	0.252094	0.259009	0.239856	0.183285	0.342606	0.329315	0.1759	0.15655	0.225795	0.447057
C133-HLJ-0	0.672527	0.189196	0.150679	0.22834	0.181199	0.403411	0.236765	0.283435	0.248722	0.146416	0.287933	0.278303	0.0993207	0.581317	0.142882	0.445257	0.279593	0.297588	0.489366	0.126499	0.111816	0.269242	0.431952	0.392581	0.190458	0.43809	0.0237747	0.140275	0.291784	0.112877	0.242429	0.0715943	0.0854803	0.443668	0.129653	0.146525	0.341197	0.501184	0.136927	0.320221	0.299928	0.303908	0.315773	0.0708824	0.127864	0.177636	0.606655	0.709894	0.841636
C134-HLJ-0	0.340854	0.246057	0.101438	0.278941	0.0707553	0.416328	0.269114	0.123492	0.274125	0.203097	0.249999	0.37525	0.206933	0.304691	0.11275	0.318265	0.400328	0.115243	0.443234	0.154933	0.164562	0.132104	0.261189	0.317594	0.29754	0.266384	0	0.138795	0.222025	0.203579	0.2999	0	0.0912819	0.451873	0.175561	0.0172567	0.217848	0.519579	0.122137	0.171736	0.258412	0.308668	0.217401	0	0	0.332309	0.399976	0.33634	0.368133
C135-HLJ-Ⅰ	0.312615	0	0	0	0.0186117	0	0.0158306	0.148352	0.0657099	0.103498	0.0109455	0.217068	0	0.246086	0	0	0.0647244	0	0.255102	0.216498	0.0646936	0.0399383	0.342695	0.182292	0.219078	0.111414	0	0	0	0.132826	0.0718981	0	0	0.0200294	0	0	0.153373	0.105941	0	0.18743	0.168611	0.219645	0.136236	0	0	0.122826	0.0978595	0.27614	0.588009
C136-HLJ-0	0.337973	0.364168	0.424612	0.472639	0.304034	0.663195	0.484812	0.0720229	0.21304	0.281899	0.407953	0.32235	0.135796	0.442485	0.374584	0.382907	0.449923	0.418287	0.4684	0.326401	0.269078	0.353369	0.509684	0.448816	0.413298	0.606849	0.0422882	0.430913	0.445224	0.596519	0.491523	0.272532	0.321143	0.563537	0.336201	0.293848	0.306715	0.559608	0.26575	0.563037	0.511711	0.407901	0.35851	0.273579	0.253324	0.434069	0.512453	0.526591	0.586458
C137-HLJ-0	0.20427	0.264715	0.125551	0.0835236	0.0307432	0.38102	0.214492	0.111296	0.213282	0.088265	0.196506	0.416607	0.146886	0.162564	0.260587	0.276561	0.207289	0.0551164	0.36194	0.252031	0.0369155	0.147873	0.273658	0.260534	0.30186	0.224674	0.00846145	0.233569	0.273553	0.145756	0.235562	0	0.107888	0.267676	0.140243	0.0172669	0.0978879	0.323687	0.0934128	0.236438	0.226763	0.185682	0.151548	0	0	0.28823	0.371852	0.188936	0.463737
C138-JL-Ⅰ	0.375885	0.232747	0.254554	0.287343	0.145548	0.178146	0.0301371	0.151555	0.145167	0.202957	0.156315	0.0187501	0	0.328835	0	0.235773	0.269769	0.172138	0.416356	0.297368	0.192431	0.202765	0.358097	0.257637	0.108589	0.505459	0	0.0897057	0.242752	0.059941	0.061551	0.0995866	0.0272806	0.217807	0.0121742	0.28065	0.364966	0.175124	0.112289	0.311776	0.217476	0.3883	0.180116	0.108958	0.0923785	0.103125	0.192561	0.383199	0.715204
C139-HLJ-Ⅰ	0.72911	0.543965	0.431532	0.425818	0.344148	1.27737	0.90978	0	0.198457	0.336915	0.734517	0.345531	0.490925	0.683608	0.827744	0.877269	0.516358	0.518197	0.433151	0.0233244	0.323711	0.494964	0.635444	0.587964	0.555326	0.695254	0.573231	0.892473	0.808533	0.620856	0.849405	0.26336	0.463423	0.551892	0.397074	0.4646	0.374379	0.509416	0.4858	0.70202	0.493764	0.459359	0.554506	0.266682	0.278012	0.593126	0.734459	0.699305	0.209577
C140-HLJ-00	0.420505	0	0	0.0667589	0	0.218523	0.221317	0.12021	0.150002	0.00719106	0.0499261	0.201002	0.0285279	0.291354	0	0.188837	0.336951	0.0405723	0.258354	0.213035	0.00816739	0.0568992	0.250307	0.300309	0.412849	0.210723	0.11183	0.00186659	0.0602891	0.30497	0.266296	0	0.0818896	0.352443	0.140161	0.178967	0.212348	0.392398	0.102056	0.116532	0.175113	0.320026	0.302239	0	0	0.255757	0.201152	0.333266	0.330685
C141-HLJ-00	0.087135	0.150964	0	0	0	0.319257	0.26647	0.163379	0.221157	0.0337169	0.139032	0.374016	0.243232	0.139249	0.177788	0.164742	0.168647	0	0.18158	0.141937	0.0136864	0.0637367	0.215162	0.205769	0.29722	0.223649	0	0.137568	0.166517	0.296058	0.279596	0	0.0127032	0.224104	0.147354	0.0494545	0.0601453	0.308234	0.106837	0.175283	0.20025	0.229976	0.20693	0	0	0.292006	0.309295	0.223294	0.296434
C142-HLJ-000	0.441595	0	0.00445408	0	0.0949665	0.138114	0.195372	0.0325356	0.0611307	0.124168	0.0492318	0.0583373	0.0657705	0.237278	0	0.137041	0.204981	0.0562944	0.283793	0.38469	0.095888	0	0.241604	0.27721	0.352653	0.0926648	0	0.00285687	0	0.199271	0.198725	0.103702	0	0.439762	0.049695	0	0.249548	0.538768	0.0149178	0.181928	0.3321	0.2274	0.215224	0.104931	0.110686	0.203885	0.162278	0.196654	0.287314
C143-JL-Ⅱ	0.620712	0.660632	1.01014	0.403798	1.60206	0.375352	0.720894	0	0.0726766	1.34689	0.799358	0.267332	0.119023	0.380996	0.532849	0.445314	0.290238	1.12685	0.606113	0.823862	1.38438	0.4914	0.525667	0.462036	0.421058	0.187675	0.780515	0.635318	0.290874	0.430293	0.503148	1.41605	0.532048	0.330542	0.333665	0.958924	0.623696	0.269526	0.525938	0.624899	0.377645	0.228067	0.271857	1.41256	1.88083	0.281084	0.351994	0.242549	0.1305
C144-JL-Ⅱ	0.527155	0.222409	0.297794	0.29497	0.18824	0.632466	0.4831	0	0.124553	0.15895	0.362759	0.192753	0.283074	0.460498	0.408616	0.508846	0.265741	0.368584	0.412317	0.289643	0.163741	0.397473	0.501435	0.395346	0.375022	0.446759	0.475104	0.5025	0.433954	0.33629	0.420312	0.219022	0.193034	0.331274	0.270655	0.370109	0.387349	0.262474	0.335195	0.464499	0.345923	0.387344	0.430971	0.223989	0.247816	0.457067	0.363514	0.442328	0.422328
C145-HLJ-0	0.61769	0.613909	0.38558	0.609967	0.220184	1.12655	0.766772	0	0.206305	0.261087	0.635295	0.424687	0.415701	0.465647	0.827345	0.8001	0.576779	0.466775	0.499756	0	0.24538	0.447099	0.52968	0.508833	0.434497	0.762952	0.486347	0.913138	0.778315	0.451061	0.687121	0.203246	0.465513	0.564749	0.34006	0.609735	0.377582	0.655626	0.559827	0.497024	0.350293	0.59677	0.525342	0.210346	0.163789	0.493733	0.657978	0.717525	0.398157
C146-HLJ-00	0.316255	0.266369	0.304428	0.137851	0	0.567735	0.307999	0.207561	0.310953	0.00725726	0.230751	0.476933	0.0489326	0.277919	0.375687	0.52689	0.319728	0.167226	0.362569	0.27287	0	0.196808	0.17978	0.294546	0.350568	0.377445	0	0.343456	0.400104	0.283921	0.299216	0.0270357	0.229972	0.412308	0.199062	0.113475	0.136572	0.346015	0.0933228	0.204027	0.241238	0.285048	0.293938	0.0222622	0	0.3718	0.439194	0.245894	0.4062
C147-HLJ-00	0.201695	0.0819682	0.164501	0.00567816	0.234183	0	0.116101	0	0	0.256505	0.138868	0.00182435	0	0.175126	0	0.0443082	0.174377	0.108219	0.424245	0.252529	0.212818	0.0887663	0.224171	0.190723	0.220938	0.174341	0.0926421	0.0284764	0.0346428	0.139611	0.0935296	0.196923	0	0.0928512	0.194517	0.0780067	0.295034	0.0946204	0.0729573	0.335635	0.269353	0.15413	0.134552	0.213223	0.182198	0.0783065	0.226103	0.16249	0.427201
C148-HLJ-00	0.553651	0.0731606	0.0804658	0.193576	0.103884	0.248892	0.17837	0.300737	0.297889	0.150648	0.169502	0.29232	0.207221	0.432229	0.0164772	0.327095	0.325178	0.151402	0.523991	0.221398	0.120859	0.137115	0.329791	0.35782	0.239274	0.118573	0	0.0228085	0.129036	0.13961	0.182725	0.0564103	0.173505	0.461261	0.0105269	0.0297705	0.234802	0.482834	0.110803	0.111991	0.224602	0.200867	0.156117	0.0598973	0.0578386	0.256283	0.421041	0.385809	0.500298
C149-AH-Ⅲ	0.317127	0.102967	0	0.17133	0	0.243736	0.0954257	0.437466	0.421765	0	0.0145283	0.0853856	0.10829	0.0441222	0	0.106641	0.207213	0.0916825	0.157093	0.0257088	0	0	0.0928436	0.0996998	0.170709	0.257589	0	0.0473997	0.07322	0.272235	0.210765	0	0.0202862	0.171281	0.241473	0.100453	0.0210888	0.198903	0.103279	0.0491004	0.121634	0.533211	0.258267	0	0	0	0.194197	0.227519	0.139843
C150-AH-Ⅲ	0.345793	0.103114	0	0.106292	0	0.264247	0.107765	0.413332	0.402524	0	0.0718336	0.283501	0.251919	0.0849525	0	0.206305	0.192974	0.0290641	0.0726003	0.0428767	0	0.0228901	0.158397	0.124331	0.228724	0.231614	0.0456455	0.0360042	0.101079	0.302539	0.222693	0	0.0817993	0.289515	0.260934	0.11615	0.0525998	0.349789	0.179157	0.0811804	0.143389	0.468404	0.277132	0	0	0.00658506	0.193512	0.206669	0.282274
C151-HN-Ⅳ	0.388266	0.122056	0.0335617	0.111328	0	0.228565	0.0313943	0.395436	0.348895	0	0.0648226	0.255693	0.372057	0.0422617	0	0.285182	0.120654	0	0.0507019	0	0	0.0856732	0.170427	0.0899904	0.132355	0.248329	0.0347647	0.00986537	0.115928	0.236056	0.138746	0	0.0422591	0.290722	0.341236	0.155931	0.0903309	0.342433	0.248341	0.0666522	0.106822	0.366439	0.228748	0	0	0.000505023	0.186392	0.278158	0.259271
C152-SD-Ⅲ	0.0600578	0.0128833	0	0.0403295	0	0	0	0.293688	0.124763	0	0	0.335957	0.170467	0.0235364	0	0.037516	0.0361415	0	0	0	0	0.144222	0.153133	0	0	0.0327631	0.0391936	0	0	0	0	0	0.0143503	0	0.207729	0.113354	0.0199977	0	0.178742	0.0151691	0	0	0	0	0	0.0835699	0.0777613	0.158907	0.208999
C153-SD-Ⅲ	0	0	0	0	0	0	0	0.515683	0	0	0	0	0	0	0	0	0	0	0	0	0	0	0	0	0	0	0	0	0	0	0	0	0	0	0	0	0	0	0	0	0	0	0	0	0	0	0	0	0
C154-SD-Ⅲ	0.167414	0	0.100232	0.111028	0	0.152621	0	0.438372	0.264088	0	0	0.481093	0.42639	0.115486	0.00402061	0.0997706	0.163437	0	0	0.0411662	0	0.102796	0.0789468	0.102659	0.0647159	0.0612489	0	0	0.0138545	0.306352	0.0919547	0	0.294614	0.330275	0.238539	0.0925977	0	0.199166	0.165974	0.16469	0.217874	0.202299	0.152625	0	0	0.057443	0.304031	0.218515	0.15985
C155-HN-Ⅲ	0	0	0	0.0204561	0	0	0	0.338623	0.220256	0	0	0.39078	0.251057	0	0	0	0.228666	0	0.0330669	0	0	0	0	0.0633743	0.133746	0	0	0	0	0.24615	0.100339	0	0	0.291915	0.0964026	0	0	0.29921	0	0	0.150001	0.132873	0.0601006	0	0	0.0737956	0.211514	0.186864	0.191433
C156-BJ-Ⅲ	0.082387	0	0	0.12294	0	0.159914	0.0321375	0.314266	0.296137	0	0	0.144939	0.291193	0	0	0.0018153	0.123941	0	0	0	0	0.0117552	0.0753017	0.0406108	0.00458878	0.172321	0.00309513	0	0.00988342	0.0213687	0.0985288	0	0.110236	0.256458	0.227819	0.0268762	0	0.301502	0.0955331	0	0.0708666	0.219742	0.167124	0	0	0.0171495	0.109595	0.0859312	0
C157-BJ-Ⅲ	0	0	0	0	0	0	0	0.239125	0.145613	0	0	0	0	0	0	0	0.113206	0	0	0	0	0	0	0	0	0	0	0	0	0	0	0	0	0.00445902	0.00110499	0	0	0.0046042	0	0	0	0	0	0	0	0.0252392	0	0	0.0714807
C158-BJ-Ⅴ	0	0	0	0	0	0	0	0.592054	0.0480947	0	0	0	0	0	0	0	0	0	0	0	0	0	0	0	0	0	0	0	0	0	0	0	0	0	0	0	0	0	0	0	0	0	0	0	0	0	0	0	0
C159-SX-Ⅲ	0.0879598	0.0903315	0	0.184136	0	0.281731	0.144949	0.344466	0.214438	0	0.0984738	0.234384	0.254098	0.17207	0.121927	0.163025	0.237674	0.106749	0	0	0	0.238928	0.280425	0.197501	0.0814462	0.211262	0.0531984	0.0241315	0.158997	0.172697	0.115896	0	0.185513	0.151868	0.0694973	0	0	0.00997954	0.0968891	0.327493	0.135882	0.00248803	0.0384487	0	0	0.249929	0.27527	0.187929	0.0702923
C160-SX-Ⅳ	0.0132128	0.405751	0.377164	0.272882	0.227513	0.242515	0.0837347	0	0	0.197129	0.254721	0.073246	0.0549888	0.0668651	0.440285	0.323003	0.26662	0.25568	0	0.0370355	0.206809	0.230948	0.0371996	0.0919786	0.0625872	0.189238	0.286395	0.471826	0.314695	0	0.0417801	0.246306	0.493455	0.135274	0.188778	0.370984	0.0845418	0	0.199431	0.13095	0.0280693	0	0	0.248634	0.163333	0.157145	0.0195576	0	0.0843083
C161-SX-Ⅲ	0	0	0	0	0	0	0	0.33756	0	0	0	0	0	0	0	0	0	0	0	0.272	0	0	0	0	0	0	0	0	0	0.00569876	0	0	0	0	0	0	0	0	0	0	0	0	0	0	0	0	0	0	0.00989098
C162-SX-Ⅳ	0	0	0	0.0172919	0	0	0	0.210097	0.0106573	0	0	0.107291	0	0	0	0	0.225696	0	0	0	0	0	0	0	0	0	0	0	0	0	0	0	0	0.0535794	0.0419783	0	0	0.00241879	0	0	0	0	0	0	0	0	0	0	0
C163-SX-Ⅴ	0	0	0	0.231648	0	0	0	0.293994	0.107509	0	0	0	0.0402949	0	0	0	0.0756215	0	0	0	0	0	0	0	0.079866	0	0	0	0	0	0	0	0.200082	0	0	0	0	0.0222712	0	0	0	0.0290999	0	0	0	0	0	0	0
C164-BJ-Ⅲ	0.0763502	0.0312448	0	0.101723	0	0	0	0.127139	0.0249548	0	0	0.202329	0.122539	0.0241082	0	0.0171602	0.105703	0.0172787	0	0	0	0.074666	0.0482205	0	0	0.0103226	0.199375	0.028975	0	0	0	0	0.201158	0.0322955	0.212997	0.200687	0.104652	0.0612586	0.19677	0	0	0.0163842	0.0474313	0	0	0	0	0.036764	0.0866597
C165-LN-Ⅲ	0	0	0	0	0	0	0	0.127116	0	0	0	0	0	0	0	0	0	0	0	0	0	0	0	0	0	0	0	0	0	0	0	0	0	0	0	0	0	0	0	0	0	0	0	0	0	0	0	0	0
C166-LN-Ⅲ	0.0254917	0	0	0	0	0	0.0390116	0	0.0491636	0	0	0.00291607	0.251024	0.0671974	0	0	0	0	0	0	0	0.0506068	0.207455	0.111888	0	0.330493	0	0	0.0537488	0	0.0268317	0	0	0	0.254019	0.105322	0.0831854	0	0.131169	0	0	0	0.0469538	0	0	0	0	0	0
C167-LN-Ⅲ	0.407764	0.279396	0.309091	0.17748	0.313881	0.477198	0.381336	0.190528	0.427828	0.208343	0.368719	0.488282	0.272228	0.366457	0.242813	0.317584	0.616355	0.527171	0.337755	0.169786	0.213292	0.312199	0.48661	0.536902	0.508999	0.522198	0.139677	0.236196	0.328679	0.451824	0.413611	0.396405	0.233535	0.562889	0.410672	0.429134	0.162602	0.445453	0.236817	0.243951	0.331285	0.436691	0.396672	0.400706	0.458104	0.0932948	0.507858	0.333841	0.0611505
C168-LN-Ⅲ	0.458966	0.149658	0.208856	0.188715	0.00841546	0.235494	0.147282	0.393838	0.405297	0.0276214	0.139872	0.0956657	0.12161	0.223771	0	0.267608	0.405243	0.185834	0.308547	0.0689043	0.043539	0.101135	0.203807	0.265217	0.285216	0.295182	0	0.0687853	0.162373	0.321677	0.269631	0.0995237	0.111022	0.229641	0.160143	0.1404	0.178493	0.317055	0.12538	0.107753	0.167818	0.524752	0.305676	0.0993144	0	0.105418	0.387117	0.353696	0.326023
C169-LN-Ⅲ	0.238557	0.23138	0.136001	0.332803	0.152516	0.22446	0.153369	0	0.0800771	0.258059	0.198286	0.110304	0.201185	0.0827058	0.20061	0.331821	0.298825	0.202586	0.0892699	0.0334893	0.192166	0.0829411	0.0967879	0.181836	0.0845926	0.11135	0.319865	0.297999	0.165648	0	0.109963	0.225881	0.177346	0.302725	0.353107	0.265083	0.157221	0.344575	0.199515	0.0627464	0.0587973	0.21017	0.23917	0.231365	0.22393	0.12977	0.0819647	0.0262745	0
C170-BJ-Ⅲ	0.0377657	0	0	0.0477306	0	0.032723	0	0.353316	0.259525	0	0	0.167739	0.118005	0.0229023	0	0	0.134252	0.00239967	0	0	0	0	0	0	0.0449829	0.0203316	0	0	0	0.11018	0.063336	0	0.0655782	0.102379	0.172647	0	0	0.0973315	0.0238705	0.0599993	0.0899362	0.241295	0.0964275	0	0	0	0.0652451	0.00708997	0.0727119
C171-BJ-Ⅳ	0	0	0	0	0	0	0	0.206427	0.0654943	0	0	0	0.107869	0	0.000884466	0	0	0	0	0	0	0	0	0	0	0	0	0	0	0.0418589	0	0	0.0757438	0	0	0	0	0	0.0142883	0	0	0	0	0	0	0	0	0	0
C172-BJ-Ⅲ	0.0149774	0	0.0958573	0	0.164299	0.141147	0.0894688	0.0735987	0.0216623	0.13438	0.0748511	0.408208	0.139388	0.0553258	0.107119	0.122917	0.339906	0.0999861	0	0.192065	0.105663	0	0	0.12983	0.122817	0.0310934	0.0672343	0.180003	0.0906448	0.156584	0.102878	0.0867725	0.186928	0.373017	0.227259	0.124324	0.0962464	0.194732	0.131406	0.132056	0.254433	0.172451	0.190476	0.0937643	0.13674	0	0	0	0
C173-BJ-Ⅲ	0	0	0	0.0201203	0	0	0	0.279213	0.164268	0	0	0.208495	0.0926655	0	0	0	0.0302918	0	0	0	0	0	0	0	0.0421132	0	0	0	0	0.0715869	0.0080847	0	0.0578361	0	0.0325145	0	0	0	0.0126424	0	0	0.166441	0.0335505	0	0	0	0	0	0.0479364
C174-HB-Ⅲ	0.515852	0.0885062	0.206944	0.405571	0.0411143	0.364372	0.157005	0.373176	0.365287	0.061098	0.181963	0.0988633	0.133959	0.178435	0.0810565	0.215842	0.464744	0.306472	0.309228	0	0.0353467	0.0751671	0.195475	0.286269	0.239337	0.201094	0.0731327	0.156434	0.114212	0.251053	0.270275	0.157154	0.114607	0.43144	0.328487	0.109157	0.154394	0.386417	0.145326	0.199954	0.251728	0.497741	0.30456	0.157875	0.112651	0.0511271	0.454304	0.405043	0.326729
C175-HB-Ⅲ	0	0	0	0	0	0	0	0.088729	0	0	0	0	0.286609	0	0	0	0	0	0	0	0	0	0	0	0	0	0	0	0	0	0	0	0	0	0	0	0	0	0.0181591	0	0	0	0	0	0	0	0	0	0
C176-HB-Ⅲ	0.0901054	0	0	0	0	0.0286177	0	0.0567901	0.0501041	0	0	0	0.349523	0.12874	0.0394246	0.160024	0	0	0	0	0	0.0854252	0.085768	0	0	0.169497	0.019808	0.0619149	0.179728	0	0	0	0.0284714	0	0	0	0	0	0.188144	0	0	0	0	0	0	0.0810888	0.0960972	0.076903	0.0636571
C177-HB-Ⅲ	0.0758439	0	0	0	0	0	0	0.185404	0.152545	0	0	0.151991	0.181964	0.0998214	0	0.0478851	0.0966468	0	0	0	0	0	0.116342	0.0316433	0.0890268	0.163345	0	0	0	0.0471128	0.0571822	0	0	0	0	0	0.000210515	0.0252278	0.0718539	0.031814	0.035251	0.170099	0.107684	0	0	0.213744	0.0669781	0.212756	0.207696
C178-HB-Ⅲ	0.00952155	0	0	0	0	0	0	0.0880756	0.116555	0	0	0.0931199	0.133793	0.0340629	0	0.00645243	0.106426	0	0	0	0	0	0.0352603	0.000216008	0.0550683	0.123793	0.00371047	0	0	0	0	0	0.0518562	0	0	0	0.0145122	0	0.0652799	0.0863329	0.0343276	0.180577	0.104433	0	0	0.166983	0	0.123752	0.309993
C179-HB-Ⅲ	0	0	0	0	0	0	0.0162385	0.381021	0.272967	0.0182539	0	0.109231	0.00680125	0	0	0	0.321282	0	0.227033	0.011376	0.0220735	0	0.0612268	0.138895	0.10153	0	0	0	0	0	0.0386227	0	0	0.343403	0.138394	0	0.00301467	0.35214	0	0.0153881	0.0827717	0	0.0571216	0	0	0.075601	0.049698	0.00375994	0.232195
C180-SX-Ⅲ	0	0	0.147651	0.243892	0.0763402	0	0	0.221071	0.0459236	0.0977985	0	0	0	0	0.0739117	0	0	0.163712	0	0.084667	0.0899647	0	0	0	0	0	0.177472	0.176474	0	0	0	0.141959	0.320527	0.265436	0	0.0840832	0.0200042	0.301732	0	0	0	0	0	0.142803	0.179463	0	0	0	0
C181-SD-Ⅳ	0.213677	0	0	0	0	0.00154303	0.0132717	0.294471	0.22146	0	0	0.491848	0.322933	0.0956145	0	0.0637845	0.0651161	0	0	0.0087462	0	0.0499958	0.239351	0.088447	0.00659746	0.114689	0	0	0	0.199225	0.104268	0	0	0.0469755	0.332591	0.0454557	0.0511898	0.0446577	0.209307	0.0758509	0.0582566	0.0853922	0.0913649	0	0	0.148933	0.121784	0.237708	0.276725
C182-SD-Ⅱ	0.0280042	0.123301	0.18134	0.0463601	0.198729	0	0	0	0	0.136812	0.0743657	0	0.183697	0.151019	0.0413606	0.141225	0.228417	0.168133	0.0607857	0.0389648	0.124695	0.223709	0.263475	0.162571	0.04604	0.160752	0.275074	0.0890367	0.114341	0	0	0.17583	0.234736	0.1133	0.241428	0.159534	0.169249	0.0468095	0.193425	0.0559155	0.0860132	0.0198217	0.0677688	0.178414	0.171533	0.0780027	0	0.118047	0.0573739
C183-SD-Ⅲ	0.337304	0.183978	0.157638	0	0.142006	0.162969	0.0849762	0	0.0362564	0.0501029	0.141829	0.320594	0.237424	0.310132	0.119842	0.208905	0.467032	0.21212	0.0841343	0.0688865	0.0423408	0.236996	0.393608	0.290789	0.14472	0.302977	0.362052	0.127563	0.145682	0.124289	0.0971924	0.176051	0.165448	0.317706	0.511415	0.425447	0.24524	0.116135	0.337116	0.332873	0.282916	0.115747	0.265427	0.158948	0.223566	0.189064	0.188774	0.275794	0.195283
C184-SD-Ⅲ	0.220631	0.0402986	0	0.0819211	0	0.18486	0.0711119	0.498338	0.398373	0	0	0.195735	0.155108	0.069075	0	0.0432815	0.238799	0	0.0126649	0	0	0	0.0674052	0.104122	0.17302	0.184063	0	0	0.00894928	0.372728	0.210996	0	0.0334406	0.206367	0.289098	0.00624846	0	0.211898	0.0328179	0.189715	0.190258	0.421354	0.207485	0	0	0.0159676	0.164845	0.156615	0.163866
C185-SD-Ⅳ	0	0	0	0	0	0	0	0.518048	0	0	0	0	0	0	0	0	0	0	0	0	0	0	0	0	0	0	0	0	0	0	0	0	0	0	0	0	0	0	0	0	0	0	0	0	0	0	0	0	0
C186-SD-Ⅳ	0	0	0	0.0146786	0	0.0333181	0	0.153283	0.0504355	0	0.0284023	0.0871337	0.0284327	0	0.0304534	0.0228773	0	0	0	0.00550952	0	0.0300376	0.0366846	0	0	0	0.0580021	0.0521755	0.0387131	0	0.0189584	0	0.0714163	0.059671	0.0162837	0	0	0.0500996	0.00189072	0	0	0	0	0	0	0.00132118	0	0	0.108191
C187-HN-Ⅳ	0	0	0	0	0	0.125098	0.0625355	0.414904	0.190638	0	0	0.283237	0.201633	0	0	0	0.349493	0	0	0.0554271	0	0	0	0.0913256	0.215311	0.0263625	0	0	0	0.250012	0.102707	0	0.0563881	0.336211	0.295311	0	0	0.218289	0	0.126317	0.187853	0.155707	0.143109	0	0	0.0849596	0.171692	0.106938	0.106817
C188-HN-Ⅳ	0.176439	0.0857832	0	0.0170056	0	0.376206	0.297851	0.324139	0.284437	0	0.141083	0.395433	0.578818	0.139656	0.109406	0.274409	0.462664	0.0513593	0.0299535	0.0408063	0	0.166243	0.268262	0.225356	0.291015	0.308963	0.310698	0.180042	0.183639	0.390698	0.306131	0	0.160526	0.220517	0.478262	0.148397	0.0384033	0.0844308	0.32018	0.29842	0.224663	0.245416	0.293013	0.00378735	0	0.302396	0.110693	0.155419	0
C189-HN-Ⅲ	0.378819	0.0127702	0	0	0	0.0658004	0	0.655323	0.382038	0	0	0.135184	0.0244604	0.100308	0	0.109676	0.0664934	0	0.02181	0.023877	0	0	0.0771738	0.033761	0	0.175393	0	0	0.0104725	0.13663	0.0796475	0	0	0.10787	0.220667	0.0714871	0.0405853	0.16913	0.0122161	0	0.0305103	0.264394	0.13877	0	0	0.115793	0.200072	0.365661	0.564187
C190-HN-Ⅳ	0.187991	0	0	0.0165329	0	0.0904442	0.118715	0.438796	0.27842	0.00598625	0.00685321	0.215475	0.248789	0.0603696	0	0.0629345	0.281842	0	0.153286	0.176782	0.00598721	0	0.109489	0.153236	0.196102	0	0	0	0	0.194019	0.138921	0	0	0.392272	0.0889111	0	0.0050295	0.299975	0.0599866	0.00329287	0.185416	0.288543	0.174997	0	0	0.0434454	0.111749	0.0479876	0.074327
C191-JS-Ⅳ	0	0	0	0	0	0	0	0.288087	0.224757	0	0	0.166379	0.162598	0	0	0	0.150268	0	0	0	0	0	0	0	0.0178966	0	0	0	0	0.0655216	0.0322599	0	0	0	0.029052	0	0	0	0	0	0	0.142521	0.0145406	0	0	0.126303	0.037019	0	0.0207053
C192-JS-Ⅲ	0	0	0	0	0	0	0	0.296667	0.138142	0	0	0.233969	0	0	0	0	0.00935577	0	0	0.0197489	0	0	0	0	0.0603838	0	0	0	0	0	0	0	0.0673744	0	0	0	0	0	0	0	0	0.138034	0	0	0	0	0	0	0
C193-JS-Ⅳ	0	0	0	0	0	0	0	0.211439	0	0	0	0.131921	0	0	0	0	0.0631592	0	0	0	0	0	0	0	0	0	0	0	0	0.0994998	0	0	0	0	0	0	0	0	0	0	0	0.0490123	0	0	0	0	0.0227754	0	0
C194-SX-Ⅳ	0	0.151612	0.026809	0.0867313	0	6.55345e-05	0	0.132778	0.0611591	0	0	0	0.0365525	0	0.19495	0.00295704	0.0034682	0	0	0	0	0	0	0	0	0	0.0973125	0.162593	0.00617859	0	0	0	0.259082	0	0	0.0500245	0	0	0.0590144	0	0	0	0	0	0	0	0.00695695	0.000655537	0.101803
C195-JL-Ⅰ	0.413988	0.713846	0.317703	0.291237	0.32625	0.922998	0.761719	0	0.23558	0.323686	0.592059	0.361574	0.354577	0.464333	0.674955	0.681748	0.478047	0.528623	0.366046	0	0.35473	0.523605	0.670133	0.550606	0.468307	1.07794	0.362545	0.655954	0.832105	0.401696	0.578744	0.248569	0.270343	0.421632	0.545624	0.473694	0.352576	0.195607	0.408342	0.72424	0.47338	0.459127	0.529295	0.249622	0.255372	0.74645	0.641486	0.631321	0.24867
C196-JL-Ⅱ	1.06484	0.786378	0.741014	0.681024	0.474344	1.88612	1.25095	0	0.245495	0.444827	0.988464	0.398063	0.4988	0.787947	1.3083	1.27164	0.629759	0.830107	0.410455	0.0217939	0.444582	0.710332	0.732226	0.69015	0.691035	1.05437	0.900355	1.36302	1.14968	0.915424	1.14322	0.389946	0.735113	0.670838	0.480626	0.814425	0.416216	0.688455	0.628005	0.962353	0.58792	0.684951	0.762961	0.392758	0.363641	0.78279	1.0936	1.11511	0.289477
C197-JL-Ⅰ	0.264884	0.562	0.585556	0.737165	0.485917	0.232184	0.111787	0	0	0.47366	0.321714	0.0926075	0.601793	0.336992	0.443002	0.288277	0.29709	0.513764	0.19655	0.268433	0.459082	0.24631	0.113253	0.164104	0	0.0258683	0.317931	0.465221	0.191428	0.133322	0.143625	0.453183	0.618296	0.189333	0.189123	0.583798	0.346912	0.382163	0.58393	0.267981	0.193255	0.482816	0.299726	0.458261	0.473045	0.0471304	0.296424	0.294122	0.235082
C198-JL-Ⅱ	0.334797	0.666352	0.809839	0.658247	0.631445	0.631239	0.307769	0	0.0061647	0.590669	0.499461	0.265545	0.167429	0.35087	0.87833	0.469481	0.628916	0.724614	0.20546	0.411997	0.579937	0.374142	0.16809	0.264894	0.3721	0.216257	0.596593	0.842309	0.481054	0.264005	0.314582	0.59051	0.804461	0.311049	0.221618	0.566156	0.333926	0.319735	0.456482	0.459942	0.254549	0.618541	0.396479	0.573777	0.561056	0.328516	0.505797	0.415746	0.264044
C199-JL-Ⅰ	0.138702	0.212606	0.161416	0.154727	0	0.36618	0.195124	0.0573342	0.166406	0.0289789	0.1715	0.178337	0.250139	0.103143	0.321697	0.203263	0.264679	0.00709952	0.175487	0.195677	0.041745	0.152111	0.27114	0.161684	0.330877	0.200077	0.131705	0.307425	0.206145	0.313942	0.263877	0.0556268	0.21947	0.0486905	0.296606	0.0910723	0.101023	0.0533048	0.251259	0.382493	0.249442	0.241256	0.248798	0.068974	0	0.408648	0.262588	0.312812	0.346321
C200-JL-Ⅰ	0	0.00671611	0	0.0323214	0	0	0	0.175635	0.0298401	0	0	0	0	0	0.0326518	0.0250053	0	0	0	0	0	0.0158153	0	0	0	0	0	0	0.0316653	0	0	0	0.112888	0	0	0	0	0	0	0	0	0	0	0	0	0	0	0	0.171813
C201-HLJ-0	0.492065	0.556139	0.684264	0.589574	0.749184	0.34843	0.483932	0	0	0.774756	0.488545	0	0.0690538	0.279291	0.472245	0.371347	0.0971589	0.666431	0.468749	0.376467	0.796802	0.314611	0.288971	0.216362	0.25625	0.128075	0.402569	0.574845	0.218139	0.267048	0.399697	0.761256	0.460115	0.0611463	0.241018	0.65095	0.492231	0.239024	0.34027	0.541706	0.206279	0.184623	0.202251	0.769637	0.667931	0.350992	0.352365	0.493854	0.388151
C202-HLJ-0	0.159821	0.134831	0	0.0139032	0	0.19455	0.148614	0.266567	0.258018	0.0134803	0.0765333	0.229534	0.151653	0.154782	0.0775544	0.124644	0.134718	0	0.174835	0.102278	0	0.0507599	0.0770998	0.123699	0.171577	0.0778827	0	0.0249426	0.0484085	0.201594	0.170724	0	0.113177	0.113358	0	0	0.0142798	0.190297	0.0490885	0.114352	0.123187	0.204559	0.102681	0	0	0.15326	0.28821	0.195459	0.157489
C203-HLJ-0	0.292787	0.35786	0.345028	0.2769	0.373686	0.256065	0.322594	0	0.0802122	0.383786	0.311254	0.346323	0.115397	0.0960089	0.472039	0.359977	0.0675095	0.307036	0.117768	0.249145	0.398141	0.220052	0.189968	0.192863	0.137681	0.0291156	0.317036	0.459146	0.164873	0.0409912	0.254382	0.407806	0.273937	0.203872	0.226364	0.396064	0.220996	0.346301	0.178767	0.13759	0.0572925	0.000889096	0.113181	0.410884	0.437618	0.347846	0.220752	0.139137	0.18347
C204-HLJ-Ⅰ	0.430152	0.172331	0.159484	0.0894836	0.28356	0.0971762	0.266292	0	0.0513802	0.341745	0.204554	0.236606	0.241241	0.460474	0.0179201	0.198035	0.250521	0.12882	0.583166	0.495754	0.321615	0.244454	0.631164	0.47696	0.26952	0.243985	0.0552619	0.101757	0.0778719	0.15467	0.206212	0.269463	0.140032	0.21317	0.0517354	0.256634	0.406504	0.297136	0.25343	0.337809	0.316731	0.201312	0.2232	0.278834	0.269855	0.130681	0.167529	0.219004	0.572884
C205-HLJ-00	0.25282	0.0914297	0.232364	0.115693	0.282285	0.209321	0.238646	0	0	0.176632	0.224764	0.206567	0	0.368267	0.178526	0.293862	0.0777141	0.23121	0.221285	0.236528	0.167105	0.31074	0.469378	0.295347	0.195433	0.208523	0.232797	0.154085	0.123286	0.108491	0.0952522	0.230964	0.0615332	0.179431	0.168195	0.207723	0.339693	0.162701	0.141846	0.438686	0.229516	0	0.100252	0.236184	0.270571	0.454291	0.185239	0.323719	0.665241
C206-HLJ-000	0.175231	0.00654329	0.0952543	0.0431704	0.0174209	0.198464	0.0321493	0.41251	0.303772	0.00708328	0.128151	0.140133	0	0.142807	0	0.0467856	0.122973	0.149665	0.280403	0.152476	0.0119604	0	0.106648	0.171238	0.0490906	0.226934	0	0.0596592	0.175099	0.0152221	0.0811904	0	0	0.309113	0.0420439	0	0.0760824	0.332332	0	0.0754854	0.184028	0.26942	0.188207	0	0.00988749	0	0.28866	0.236903	0.491657
C207-HLJ-00	0.158323	0.119573	0.0735449	0.0777596	0	0.302151	0.21667	0	0.0950307	0.0162612	0.126481	0.176181	0.191965	0.182019	0.12178	0.22625	0.336692	0.0452877	0.374312	0.150694	0.00133685	0.0679677	0.197792	0.279742	0.306498	0.241496	0	0.178308	0.215754	0.162253	0.178837	0	0.131201	0.348323	0.130234	0	0.16195	0.299031	0.132352	0.16773	0.270297	0.266916	0.216547	0	0	0.207044	0.189807	0.0926267	0.0415077
C208-HLJ-0	0.545944	0.316	0.304344	0.293355	0.119308	0.277682	0.183745	0.15409	0.233692	0.206618	0.286442	0.067992	0	0.305153	0.303928	0.345217	0.0292174	0.223977	0.375346	0.252009	0.186932	0.281586	0.39249	0.221151	0.0859478	0.408887	0.183313	0.294673	0.32195	0.188511	0.242134	0.230957	0.102228	0.116568	0.0768507	0.363799	0.363519	0.2673	0.150999	0.419286	0.178096	0.251621	0.174886	0.231636	0.127793	0.364466	0.485519	0.680237	1.97057
C209-HLJ-Ⅰ	0.28819	0.120382	0.0521175	0.0178514	0.128419	0.163153	0.183531	0	0.0527632	0.23774	0.132814	0.187206	0.169565	0.238109	0.0642338	0.175286	0.10876	0.00330466	0.389664	0.307877	0.215273	0.121593	0.300968	0.215899	0.160291	0.151288	0.0143083	0.0621655	0.0613684	0.000427782	0.069752	0.0390379	0.0592206	0.115653	0.109903	0.181441	0.337893	0.172286	0.182656	0.230531	0.165035	0.0375459	0.114317	0.0357607	0.0366619	0.294657	0.170213	0.368001	0.591287
C210-HLJ-0	0.474147	0.0541999	0.0928845	0	0.289457	0.0209149	0.221575	0	0.0403937	0.289289	0.127932	0.21696	0	0.400513	0	0.123598	0.271998	0	0.537895	0.43956	0.302654	0.170973	0.579118	0.436997	0.256438	0.147729	0.0270887	0.00402454	0.0586118	0.0672253	0.179146	0.187429	0	0.193244	0	0.165473	0.40057	0.275933	0.050653	0.310836	0.252536	0.0324376	0.126471	0.203421	0.245276	0.127059	0.129479	0.241925	0.68974
C211-HLJ-Ⅰ	0.144187	0	0	0.0448055	0.174663	0	0.112819	0.215223	0.115911	0.1976	0.11078	0.123187	0	0.0872937	0	0	0.133418	0.0583747	0.44524	0.511199	0.172478	0	0.124024	0.127073	0.0510838	0.0829947	0	0	0	0.0198011	0.0585885	0.0744874	0	0.100658	0	0	0.144196	0.0679276	0	0.336539	0.267936	0.142745	0.0668806	0.0623826	0.0971951	0	0.0862367	0.0571853	0.49852
C212-HLJ-Ⅰ	0.140277	0.430781	0.461022	0.612953	0.419178	0.110124	0.0175557	0	0.0331568	0.466373	0.25309	0	0.0323997	0.13164	0.290726	0.142145	0.215562	0.411327	0.292086	0.389875	0.450521	0.174551	0.0714504	0.121233	0.0477011	0.0679202	0.196697	0.365214	0.176606	0.066662	0.0674561	0.364606	0.376113	0.0818001	0	0.291498	0.215143	0.113394	0.172019	0.163447	0.0974949	0.353322	0.100754	0.374129	0.34697	0	0.113424	0.0931017	0.393259
C213-HLJ-Ⅰ	0.22691	0.245799	0.247189	0.436209	0.198816	0.229331	0.129391	0.0816281	0.158454	0.251059	0.207496	0.0338466	0.116595	0.261413	0.0997287	0.117487	0.345361	0.209181	0.468425	0.17099	0.241399	0.120563	0.207503	0.24526	0.209146	0.311516	0	0.166488	0.220348	0.175049	0.180125	0.138254	0.174182	0.198648	0.0103671	0.0941231	0.194639	0.204929	0.114046	0.290574	0.233514	0.442154	0.243898	0.147368	0.116003	0.06659	0.273703	0.244119	0.523716
C214-HLJ-0	0.0950503	0	0	0.11562	0.119503	0	0.00809027	0.184144	0.109231	0.140231	0.0301515	0.0852827	0.0117091	0.0599333	0	0	0.261886	0	0.330655	0.275593	0.130564	0	0.188055	0.206116	0.121899	0.009076	0	0	0	0	0.0034122	0.0448209	0.0309287	0.399811	0	0	0.168504	0.365034	0	0.203783	0.243168	0.17668	0.0716911	0.0341577	0.0743493	0	0.0883802	0.00457671	0.305024
C215-HLJ-Ⅰ	0.0675621	0	0	0	0.0430891	0.0579968	0.163939	0.113191	0.0913606	0.0302767	0.0627054	0.140288	0.0825418	0.175489	0	0	0.125256	0.000366908	0.362527	0.372417	0.0498035	0	0.303319	0.230934	0.238551	0.255207	0	0	0.0565235	0.224504	0.151499	0.00313241	0	0.156065	0	0	0.117901	0.101045	0	0.237266	0.288357	0.272121	0.159077	0.0123706	0.0215252	0.0109992	0.06281	0	0.345491
C216-HLJ-Ⅰ	0.413657	0.163818	0.11915	0.161166	0.196276	0.325536	0.333392	0	0.170357	0.253036	0.260981	0.256329	0.170334	0.404523	0.0270567	0.265571	0.383377	0.184275	0.464998	0.085895	0.271638	0.177479	0.40947	0.448984	0.210502	0.362074	0	0.101113	0.234709	0.125969	0.284853	0.0876236	0.014846	0.449346	0.251674	0.161228	0.294701	0.432512	0.133752	0.260201	0.331145	0.222987	0.258279	0.0873959	0.152114	0.329205	0.332535	0.31795	0.302135
C217-HLJ-0	0.0189247	0.202721	0.0924499	0.190927	0.0506292	0.122226	0.0595281	0	0	0.055123	0.0936923	0.308918	0.107206	0	0.376677	0.19327	0	0.20682	0	0.34044	0.0730539	0.0508584	0.049644	0	0.147836	0	0.282216	0.373768	0.0656515	0.0619283	0.0754363	0.104791	0.236039	0.00607269	0.0835032	0.191777	0.0101196	0.079056	0.117189	0.0400523	0.00696175	0.107749	0.0963494	0.111881	0.153189	0.120308	0.0336528	0	0.0984449
C218-HLJ-0	0.101913	0.176823	0.294618	0.4757	0.130759	0.185387	0.136529	0.13239	0.206306	0.135833	0.142408	0	0.199536	0.258391	0.0817179	0.00623539	0.153525	0.151492	0.405672	0.188448	0.140433	0.181459	0.202498	0.169183	0.19069	0.284966	0	0.160127	0.166176	0.330159	0.201619	0.168779	0.357005	0.107124	0.0377883	0.0579061	0.111699	0.169629	0.16067	0.334514	0.222226	0.341151	0.169312	0.177456	0.0782829	0.15049	0.295707	0.24559	0.500564
C219-HLJ-Ⅰ	0.202533	0.0279624	0.078204	0.065529	0.259955	0.109153	0.0853	0.142326	0.0953893	0.263729	0.174318	0.309606	0	0.182814	0.00955161	0	0.2102	0.131488	0.442619	0.394266	0.241282	0.000252423	0.187162	0.21251	0.151682	0	0	0	0	0.0435891	0.0418609	0.0978302	0	0.242779	0	0	0.150506	0.178775	0	0.319179	0.300952	0.214123	0.146478	0.0908617	0.209459	0.024212	0.28482	0.221956	0.481345
C220-HLJ-0	0.25196	0.197045	0.122441	0.149574	0.163485	0.270168	0.186987	0.0695079	0.139146	0.225395	0.217053	0.19032	0.018331	0.275988	0.106628	0.264214	0.284125	0.143123	0.321209	0.182453	0.192929	0.078537	0.14985	0.204025	0.178891	0.159403	0	0.121796	0.163861	0.100528	0.196037	0.0138596	0.0586745	0.299137	0.0749165	0.022067	0.211149	0.370899	0.0392648	0.100326	0.161757	0.207046	0.144386	0.0111788	0.0695342	0.20833	0.281733	0.241351	0.258851
C221-HLJ-0	0.361252	0	0	0.0238875	0.0831902	0.148197	0.192774	0.0140365	0.0943976	0.174177	0.128184	0.178306	0	0.265232	0	0.178362	0.238036	0.0299225	0.455951	0.200249	0.126837	0.0821694	0.361052	0.301425	0.210288	0.294668	0	0	0.101188	0.0945866	0.165397	0	0	0.379088	0.0683915	0	0.327582	0.399444	0	0.170173	0.247299	0.0651591	0.15122	0	0.0109568	0.248426	0.163773	0.314315	0.474875
C222-HLJ-0	0.353285	0.0171261	0.034722	0.109131	0.140101	0.166405	0.239633	0	0.054414	0.217642	0.166636	0.213245	0	0.267505	0	0.18322	0.216378	0.136605	0.327429	0.245705	0.197384	0.049454	0.255075	0.248436	0.278643	0.0578568	0	0	0.012177	0.0963884	0.202459	0.0876242	0	0.286597	0.0870398	0.0286506	0.249575	0.398906	0.00688542	0.131981	0.181953	0.152994	0.167624	0.0796271	0.115602	0.27057	0.208549	0.237838	0.366978
C223-HLJ-Ⅰ	0.148929	0	0	0.0542474	0.178858	0.00291236	0.119298	0.200368	0.113341	0.198475	0.118397	0.13385	0	0.0887519	0	0	0.135235	0.0711374	0.448349	0.497393	0.176111	0	0.130608	0.132554	0.043183	0.0924434	0	0	0	0.00476361	0.059414	0.0838328	0	0.110581	0	0	0.153907	0.0797234	0	0.341503	0.260778	0.12793	0.0607159	0.071728	0.103769	0	0.0953578	0.0639962	0.512843
C224-HLJ-Ⅰ	0.337488	0.274959	0.502282	0.239125	0.31325	0.264243	0.109786	0.0804519	0.0479453	0.252304	0.236724	0.146248	0	0.293578	0.41053	0.405326	0.153508	0.392646	0.274227	0.405382	0.256782	0.254553	0.186809	0.186692	0.0827882	0.239146	0.251442	0.398512	0.331042	0	0.0746071	0.364884	0.40687	0.30752	0	0.3494	0.267819	0.177482	0.105362	0.248797	0.157146	0	0.101656	0.353139	0.282989	0.192332	0.273653	0.238812	0.62625
C225-HLJ-0	0.504046	0.252885	0.217167	0.148512	0.326211	0.662265	0.624418	0	0.082022	0.373866	0.422991	0.335857	0.322365	0.407827	0.301731	0.521747	0.405988	0.204864	0.482144	0.160207	0.339789	0.236666	0.433302	0.487219	0.435956	0.433689	0.276075	0.370816	0.380363	0.292187	0.502798	0.202509	0.142037	0.512323	0.283349	0.305162	0.383582	0.517383	0.253114	0.456318	0.404837	0.259314	0.396467	0.205416	0.260198	0.373476	0.391356	0.397252	0.205188
C226-HLJ-0	0.179831	0.173122	0	0.0878346	0.0989603	0.369802	0.366871	0	0.139095	0.145966	0.239866	0.350692	0.343192	0.253995	0.13331	0.225552	0.294979	0.0588589	0.381246	0.171541	0.1273	0.137348	0.406345	0.396989	0.406612	0.239015	0.0940006	0.197375	0.231252	0.256626	0.314028	0.0280381	0.0812144	0.479767	0.261647	0.0354205	0.232842	0.439864	0.219396	0.309684	0.344177	0.177116	0.251709	0.0264987	0.072955	0.303082	0.223902	0.119474	0.173113
C227-HLJ-0	0.0662176	0.316584	0.357594	0.218735	0.232523	0.342323	0.241328	0	0	0.187252	0.221658	0.390633	0.0786371	0.12014	0.584397	0.280883	0.0621055	0.279608	0.0720164	0.266769	0.194652	0.22759	0.184913	0.14914	0.124537	0.0451302	0.381809	0.534025	0.228578	0	0.165237	0.190526	0.300397	0.142599	0.199168	0.192207	0.166682	0.343433	0.14616	0.356697	0.159123	0.0292965	0.125684	0.197078	0.221288	0.314453	0.280714	0.213496	0.210632
C228-HLJ-0	0.204481	0	0.0620607	0.100897	0.0574208	0.177756	0.14817	0	0.0161227	0.0550383	0.143309	0.212982	0.12483	0.170993	0.0053068	0.0472258	0.255934	0.131831	0.403721	0.182846	0.0347484	0.05353	0.257796	0.199912	0.148741	0.161313	0.0825137	0.0911495	0.0761967	0.191583	0.18605	0.156284	0	0.123836	0.18305	0	0.141095	0.0723836	0.124647	0.389295	0.2658	0.466437	0.304945	0.163384	0.107961	0.179362	0.116065	0.109551	0.290203
C229-HLJ-0	0.449842	0.359421	0.405303	0.251387	0.1196	0.695653	0.423597	0.103081	0.202643	0.0625993	0.339121	0.156555	0.304214	0.49943	0.481027	0.521232	0.40277	0.378976	0.373667	0.200053	0.0617664	0.419678	0.50781	0.520776	0.42582	0.547906	0.292885	0.520628	0.5342	0.422833	0.39727	0.234026	0.615562	0.529785	0.46722	0.383657	0.33385	0.465227	0.394188	0.432133	0.413082	0.40813	0.484389	0.227063	0.0901952	0.512665	0.574312	0.567581	0.503419
C230-HLJ-Ⅰ	0.50588	0.0599317	0.317457	0	0.272897	0.291659	0.313837	0	0	0.233968	0.217089	0.189375	0	0.332824	0.32152	0.394692	0.182256	0.275652	0.471896	0.494829	0.223815	0.224164	0.381274	0.339886	0.301498	0.321333	0.321773	0.284843	0.28962	0.0472861	0.142492	0.406775	0.182432	0.378612	0.21631	0.271193	0.339634	0.22718	0.110977	0.458698	0.339293	0.0254012	0.238267	0.394803	0.329379	0.41613	0.326815	0.327403	0.694879
C231-HLJ-0	0.337029	0.25197	0.209532	0.221534	0.0854193	0.399933	0.300871	0.133349	0.248742	0.101304	0.251301	0.205846	0.16584	0.335043	0.203566	0.329534	0.349166	0.222584	0.590123	0.353358	0.0874128	0.101804	0.244148	0.347407	0.312356	0.356212	0	0.257507	0.317833	0.319658	0.344002	0.0955171	0.146369	0.356635	0.142666	0.0949783	0.188545	0.383563	0.142107	0.235077	0.301621	0.371411	0.270391	0.107607	0.0430614	0.14942	0.412833	0.31075	0.326487
C232-HLJ-0	0.372931	0.363618	0.330211	0.26357	0.269401	0.355333	0.351571	0	0.119527	0.312575	0.326051	0.165475	0.0388718	0.319852	0.361899	0.360419	0.124309	0.308054	0.29721	0.349897	0.295401	0.243593	0.312921	0.2574	0.242778	0.218945	0.234554	0.359104	0.256284	0.266118	0.298197	0.277979	0.252854	0.167804	0.130236	0.305847	0.266946	0.32136	0.193636	0.273735	0.173551	0.191777	0.188203	0.276823	0.26128	0.361774	0.375461	0.407222	0.897755
C233-HLJ-0	0.0773212	0	0.0338202	0	0.140158	0.0356442	0.119944	0.14485	0.106487	0.180574	0.0979152	0.0892098	0.0399355	0.147749	0	0	0.181746	0.0122284	0.296107	0.468793	0.198409	0	0.183149	0.178371	0.177668	0.146798	0	0	0.0159417	0.16962	0.137457	0.0850802	0.0227265	0.198663	0	0	0.159264	0.179056	0	0.308549	0.287423	0.239676	0.109495	0.0921115	0.124611	0.00233239	0.0456344	0.00968548	0.458459
C234-HLJ-0	0.278459	0.0976595	0.145947	0.0521701	0.116145	0.387158	0.36527	0	0	0.0984289	0.300683	0.521206	0.00942811	0.234368	0.336753	0.535118	0.08201	0.1496	0.172464	0.166963	0.0733291	0.349711	0.440457	0.215103	0.2309	0.244525	0.355254	0.352485	0.294875	0.177219	0.256637	0.177842	0.114786	0.0325309	0.341489	0.268199	0.281675	0.0177524	0.251592	0.411335	0.105893	0.0147796	0.208457	0.171013	0.0957275	0.625528	0.0801099	0.2425	0.663275
C235-HLJ-0	0.436482	0.0803026	0.284921	0.146627	0.260798	0.356991	0.355836	0.0203117	0.0622649	0.241882	0.331355	0.367055	0	0.326779	0.320731	0.316847	0.189733	0.248094	0.343546	0.303768	0.215719	0.306188	0.454214	0.355855	0.297714	0.238178	0.246317	0.323324	0.189285	0.298253	0.277064	0.310547	0.198137	0.33063	0.210596	0.198468	0.277893	0.256624	0.0684209	0.62361	0.354474	0.0601299	0.265725	0.307028	0.254917	0.574522	0.343614	0.522265	0.921999
C236-HLJ-0	0.208639	0.0809077	0.118315	0	0.0987122	0.203264	0.195845	0	0	0.0773636	0.148301	0.149334	0.0381554	0.220996	0.144125	0.393138	0	0.0846894	0.0539329	0.320926	0.0489686	0.215855	0.365318	0.199152	0.117236	0.267652	0.259343	0.236389	0.259766	0.111914	0.125375	0.0674578	0.117094	0.042759	0.26426	0.16389	0.212483	0	0.11788	0.199299	0.133864	0	0.0517906	0.0846884	0.0532243	0.208682	0	0.0523524	0.206912
C237-HLJ-00	0.140833	0.0551527	0.330378	0.275033	0.288805	0.0363881	0.0439452	0	0	0.290202	0.119362	0	0	0.0844509	0.244434	0.149407	0	0.271114	0.262043	0.483753	0.281529	0.0631475	0.0973131	0	0.073024	0	0.286582	0.333988	0.0385551	0.127181	0.0643874	0.354226	0.259009	0	0	0.163626	0.168501	0	0.115396	0.301143	0.167101	0.0675471	0.0356459	0.350469	0.289406	0	0	0.0582744	0.285389
C238-HLJ-00	0.00691449	0	0	0.14974	0	0	0	0.0926315	0.0134016	0	0	0	0.141108	0.0537906	0	0	0.00121622	0	0.0961119	0.0680784	0	0.0342712	0.020584	0.00701634	0.016005	0	0	0	0	0	0	0	0	0.139952	0	0	0.137437	0.0463943	0.00409192	0	0.132108	0.0750872	0	0	0	0.0577631	0.0548932	0.140419	0.240631
C239-HLJ-0	0.40072	0.155167	0.280259	0.232609	0.140209	0.269418	0.265547	0.00697526	0.0235619	0.163706	0.236052	0.124068	0	0.30631	0.195514	0.390253	0.0967524	0.310619	0.378057	0.343554	0.166441	0.182721	0.343083	0.303057	0.240877	0.213239	0.104557	0.265625	0.209853	0.186756	0.25661	0.261942	0.190792	0.259532	0.123867	0.258413	0.303578	0.396286	0.0866419	0.201646	0.204545	0.241276	0.258275	0.244283	0.129509	0.204212	0.277048	0.304126	0.666978
C240-HLJ-0	0.128522	0.275171	0.453397	0.42074	0.513078	0.143658	0.304551	0	0	0.564665	0.309896	0	0.0645422	0.191219	0.265832	0.1572	0.00319212	0.428405	0.420367	0.338651	0.563274	0.163948	0.171072	0.135167	0.162263	0.0945386	0.287524	0.365924	0.177747	0.137105	0.18629	0.538676	0.269037	0.0600852	0.141954	0.29384	0.297974	0.153018	0.197354	0.2703	0.103535	0.0657472	0.0724802	0.533141	0.47639	0.221692	0.081745	0.100205	0.288466
C241-HLJ-0	0	0.0525253	0.322323	0.187989	0.300342	0.118275	0.0533383	0.0538718	0	0.202097	0.148541	0.0620507	0	0	0.347103	0.0948047	0	0.404206	0	0.551794	0.203469	0.129573	0	0	0.0513844	0	0.324434	0.321235	0.036284	0.0201938	0	0.375322	0.411597	0.0607842	0	0.142921	0	0	0	0.254166	0.0705174	0.0465274	0.0134441	0.362965	0.355339	0.0732602	0.00970662	0	0.168858
C242-HLJ-0	0.212835	0.00613651	0.131019	0.18967	0.170855	0.251593	0.272807	0	0.048101	0.199126	0.240041	0.0474906	0.127008	0.257077	0.0398409	0.111232	0.127581	0.156558	0.401158	0.143016	0.176829	0.100435	0.288439	0.228132	0.272862	0.206486	0.0558023	0.0886338	0.140923	0.231642	0.261301	0.123232	0.0182504	0.0727046	0.0395307	0	0.195355	0.0989308	0.0818441	0.473428	0.3636	0.242665	0.201473	0.125777	0.146157	0.211048	0.24359	0.249732	0.356817
C243-HLJ-0	0.167259	0	0.0627627	0.126492	0.0262187	0.0909201	0.0754387	0	0.0359437	0.110784	0.0881378	0	0.158427	0.193078	0.0490835	0	0.0977423	0.0982297	0.353974	0.236749	0.120129	0.0751818	0.273525	0.179086	0.180237	0.156523	0.0341672	0.112142	0.0551425	0.174376	0.125066	0.124798	0.0773666	0.0333439	0	0.0139774	0.205273	0	0.134444	0.353765	0.277435	0.222985	0.164615	0.121107	0.0499935	0.193739	0.149508	0.246478	0.447995
C244-HLJ-00	0.139153	0	0.11969	0.0763022	0.136044	0.112763	0.138315	0	0	0.133911	0.122481	0.135682	0	0.147727	0.106513	0.0179632	0.0467471	0.14333	0.324678	0.378235	0.119728	0.0930275	0.230772	0.121174	0.151414	0.124827	0.0897435	0.107546	0.0616561	0.157533	0.11129	0.175903	0	0.0732521	0.0480214	0.054094	0.20674	0.0510327	0.0847728	0.428666	0.323417	0.229026	0.158992	0.17194	0.132919	0.212586	0.148498	0.203953	0.612915
C245-HLJ-0	0.406289	0	0.183504	0.0741622	0.224354	0.147044	0.234345	0.00523319	0.0322299	0.236121	0.170976	0.109853	0	0.264045	0.114441	0.113972	0	0.142124	0.366974	0.324175	0.213212	0.161562	0.329753	0.224872	0.199068	0	0.0496467	0.10371	0	0.144322	0.190391	0.169026	0	0.143491	0	0.0801232	0.300569	0.260056	0.0125926	0.415217	0.243056	0.210869	0.225253	0.158914	0.173813	0.253399	0.337925	0.470232	0.845284
C246-HLJ-0	0.349126	0.185536	0.0170478	0.0273579	0.0764308	0.208323	0.303975	0	0.093318	0.0993899	0.166296	0.387469	0.346543	0.389204	0.121762	0.313879	0.144148	0	0.441844	0.32374	0.0771548	0.349408	0.757579	0.496786	0.313345	0.351946	0.119167	0.205244	0.174011	0.248002	0.299557	0.0614067	0.0708554	0.135311	0.219409	0.233161	0.306971	0.154709	0.315544	0.322188	0.2527	0.0978479	0.265938	0.0706449	0.0746919	0.296846	0.0961136	0.144845	0.410045
C247-HLJ-00	0.141058	0	0	0	0.00108779	0	0	0.0871492	0.0874801	0.0565412	0	0.0500832	0	0.0961911	0	0.010125	0.0668541	0	0.210881	0.182512	0.0311377	0.0152876	0.108232	0.0933872	0.201314	0.0553975	0	0	0	0	0.0155665	0	0	0.126948	0	0	0.158006	0.163688	0	0.120249	0.188869	0.130194	0.0840362	0	0	0.167177	0.175477	0.229109	0.426593
C248-HLJ-00	0.207335	0.163774	0.0859593	0.271006	0.0828827	0.196591	0.142135	0	0.0465101	0.108646	0.146107	0	0.0870126	0.189334	0.0718963	0.229197	0.179343	0.136782	0.166261	0.116711	0.0896058	0.143332	0.217609	0.189344	0.185411	0.161482	0.0794026	0.137927	0.161641	0.132294	0.158311	0.0385599	0.148052	0.0843505	0.099605	0.114406	0.221094	0.162549	0.123586	0.200594	0.195292	0.251627	0.176128	0.0452282	0.0439882	0.169017	0.202834	0.206292	0.210015
C249-HLJ-00	0.229246	0.053036	0.150227	0.058619	0.24398	0.120666	0.182584	0	0.0135993	0.212432	0.196612	0.222341	0.0140442	0.266913	0.0506634	0.137064	0.121235	0.162812	0.254215	0.201198	0.209762	0.123665	0.271666	0.258289	0.138974	0.136162	0.066048	0.0533394	0.0600804	0.0225862	0.0994256	0.186426	0	0.275165	0.106738	0.118247	0.327355	0.319571	0.0668275	0.345791	0.283349	0.0512212	0.121476	0.192435	0.2336	0.247211	0.16616	0.22667	0.490289
C250-HLJ-00	0.44442	0	0.184812	0.26133	0.109361	0.244145	0.233139	0	0.0784614	0.159408	0.206482	0.0710519	0.0777782	0.349934	0.0476983	0.256788	0.0911807	0.130198	0.516993	0.138497	0.124526	0.182939	0.381711	0.266121	0.107538	0.176996	0.0639503	0.0910138	0.0947145	0.162271	0.223744	0.146682	0	0.20648	0.032139	0.0704894	0.352347	0.291839	0.118619	0.444288	0.295877	0.0658607	0.181125	0.157785	0.0830537	0.341243	0.303039	0.437246	0.62478
C251-HLJ-00	0.20112	0.183521	0.333856	0.342973	0.219073	0.247646	0.239445	0	0.110786	0.279621	0.25472	0.084688	0.090582	0.290794	0.0895783	0.103989	0.328114	0.236672	0.431498	0.188755	0.287991	0.0952478	0.2323	0.28467	0.364295	0.30028	0.0644611	0.172682	0.178023	0.240015	0.244644	0.208184	0.123769	0.218665	0.0682437	0.0973892	0.247497	0.273977	0.0802647	0.411338	0.321434	0.386683	0.286235	0.193929	0.227238	0.187759	0.29465	0.192395	0.404956
C252-HLJ-00	0.141514	0.0544578	0.106593	0.231718	0.21704	0.0977484	0.130278	0	0	0.250255	0.152176	0.118212	0.0816246	0.218208	0	0.075879	0.171179	0.226363	0.274686	0.21126	0.249512	0.0285089	0.196906	0.201597	0.189403	0.0311071	0.096637	0.0800037	0.0303119	0.155192	0.124251	0.16163	0.0788145	0.257909	0.0492558	0.142261	0.204022	0.357254	0.0940387	0.191596	0.23655	0.198378	0.164638	0.162338	0.237009	0.0820199	0.0459054	0.073077	0.0800692
C253-HLJ-00	0.345052	0.0661193	0.000925633	0.00841658	0.0575499	0.25319	0.231711	0.109345	0.152424	0.0261742	0.106328	0.326519	0.157148	0.301161	0.0407151	0.222742	0.492907	0.160616	0.396445	0.244977	0.00630503	0.0204619	0.225382	0.377965	0.425832	0.167701	0.00739038	0.0774623	0.143358	0.292111	0.235865	0.0839903	0.185354	0.499304	0.0740032	0.0803317	0.0621706	0.470804	0.101213	0.126615	0.294015	0.330945	0.247499	0.0833676	0.120256	0.0398704	0.226728	0.0833251	0.0535573
C254-HLJ-00	0.058888	0.131306	0.31097	0.213483	0.350621	0.0394407	0.133745	0	0	0.336375	0.161224	0	0	0.174334	0.111954	0.158666	0	0.347286	0.257445	0.357391	0.338707	0.10919	0.194018	0.0843051	0.0412215	0.0325747	0.187505	0.178125	0.0618773	0.0428771	0.057253	0.328345	0.0596735	0.0779999	0	0.185424	0.306306	0.177521	0.0502393	0.236603	0.172476	0.0431267	0.0305389	0.334341	0.340922	0.136616	0	0.0288518	0.182648
C255-HLJ-00	0.0249846	0.048609	0.120141	0.26834	0.182962	0.142987	0.150317	0	0	0.233822	0.171153	0	0.044209	0.104841	0.0323546	0.00399679	0.0218401	0.15341	0.35597	0.279695	0.199512	0.0159335	0.157422	0.0911961	0.221079	0.220234	0	0.136195	0.116475	0.235815	0.161036	0.13271	0.0346446	0	0.0099497	0	0.113399	0.00154641	0.0456716	0.419775	0.309411	0.258759	0.124704	0.145397	0.157532	0.0737806	0.0658843	0.135784	0.421946
C256-HLJ-00	0.308723	0.176987	0.226126	0.462501	0.354376	0.161568	0.194182	0	0	0.476775	0.295836	0	0.0217862	0.164468	0.139805	0.261681	0.0254962	0.398788	0.30658	0.350765	0.451046	0.120217	0.176519	0.103345	0.035111	0.126529	0.255309	0.235301	0.0857117	0.140624	0.138532	0.373362	0.153867	0	0.0943119	0.344757	0.351397	0.186135	0.157067	0.256407	0.154063	0.0950262	0.10384	0.364684	0.368154	0.264986	0.082342	0.215926	0.317208
C257-HLJ-00	0.311242	0	0.126887	0	0.100243	0.0415637	0.0209506	0	0	0.112771	0.0780224	0	0.0266439	0.124026	0	0.149455	0	0.136552	0.380161	0.387495	0.056219	0	0.179418	0.107531	0.209779	0.0859017	0.135802	0.00851563	0.0162243	0.155583	0.0683217	0.265975	0.0220035	0	0	0	0.132631	0	0.0146711	0.387651	0.237679	0.259821	0.163158	0.270443	0.202513	0.0449326	0.0741355	0.0975077	0.309788
C258-HLJ-00	0.199863	0.0869485	0.125594	0	0.26176	0.0551154	0.158385	0	0.0799041	0.323391	0.136022	0.296525	0.0552269	0.0717916	0	0	0.279142	0.113531	0.340586	0.273996	0.323398	0	0.11177	0.303839	0.17575	0.0929284	0	0.0083584	0	0.00221493	0.107152	0.217782	0	0.56936	0.157196	0.0988271	0.3333	0.617328	0.00298336	0.297487	0.417873	0.190014	0.193705	0.213822	0.246108	0.0532275	0.121603	0.110398	0.39639
C259-HLJ-00	0.137358	0.107103	0.0304708	0.180113	0.187306	0.104429	0.136425	0	0	0.195325	0.11692	0.124522	0.127503	0.13982	0.0162714	0.0435873	0.229933	0.0686782	0.353171	0.153196	0.178346	0.0967388	0.309635	0.247285	0.227214	0.120556	0.113176	0.114193	0.0822309	0.0110238	0.0878336	0.0619948	0	0.266248	0.200188	0.0592065	0.29426	0.23594	0.106306	0.325266	0.288871	0.0918841	0.164571	0.0923529	0.10409	0.186005	0.0920328	0.135381	0.374444
C260-HLJ-0	0.455437	0	0	0.0705689	0.109653	0.316179	0.382576	0	0.0608562	0.196377	0.209965	0.11267	0.0845383	0.3285	0	0.229787	0.171171	0.140794	0.287093	0.230589	0.186919	0.0883593	0.371362	0.335337	0.355327	0.165082	0.0434203	0	0.0371638	0.303423	0.324993	0.051206	0	0.404272	0.109863	0.0279001	0.269083	0.596996	0.0450856	0.263403	0.31666	0.297664	0.251499	0.0406572	0.117374	0.365367	0.237032	0.345433	0.326011
C261-HLJ-0	0.326955	0.142936	0.00544804	0.274379	0.175533	0.347371	0.359102	0	0.173335	0.305657	0.246675	0.363818	0.295318	0.321342	0.0104577	0.249469	0.464083	0.121362	0.514695	0.151145	0.266433	0.0696137	0.282547	0.347306	0.389278	0.159529	0	0.091578	0.0749921	0.166571	0.289753	0.0364868	0.0063572	0.56092	0.230524	0	0.314535	0.600337	0.135828	0.212152	0.30284	0.251683	0.284355	0.03697	0.0892136	0.357045	0.252513	0.260146	0.170334
C262-HLJ-000	0.0800113	0.0263138	0	0.0196649	0.17141	0.107977	0.178898	0	0.0205355	0.274382	0.112883	0.22945	0.256526	0.117524	0.0110889	0	0.251813	0	0.32223	0.174004	0.280064	0	0.184563	0.229683	0.200659	0.130805	0	0.0901196	0.0238912	0.116689	0.145065	0.0733553	0	0.416149	0.241848	0.161879	0.252567	0.436714	0.122552	0.19213	0.219489	0.0549962	0.146754	0.0694248	0.0973385	0.0997751	0.0191893	0.0699129	0.157776
C263-HLJ-00	0.0790239	0.133125	0.138563	0.199396	0.354266	0.0269155	0.14057	0	0.0281187	0.399651	0.174243	0.243916	0.179005	0.13061	0	0	0.334627	0.0850311	0.40486	0.169893	0.41308	0.019707	0.23083	0.307782	0.255898	0.126745	0	0.0170202	0.00452107	0.0707641	0.113178	0.191814	0	0.296211	0.122463	0.105039	0.260464	0.286415	0.0932885	0.279489	0.313716	0.238345	0.201258	0.185594	0.258603	0.0525787	0.124312	0.0686432	0.286445
C264-HLJ-00	0	0.10997	0	0	0	0.0601128	0.0673164	0	0	0	0	0.357316	0.327092	0.0195135	0.013569	0.0183781	0.395397	0	0.190444	0.17312	0	0	0.134771	0.184151	0.230962	0.110922	0.0154478	0.0910652	0.0701111	0.0779563	0.0495787	0	0.0989565	0.292058	0.127037	0	0.172791	0.239902	0.258839	0.200964	0.300174	0.253387	0.15284	0	0	0.0856049	0	0	0.0015799
C265-HLJ-0	0.290673	0.0544269	0.255356	0.181578	0.329983	0	0	0	0	0.346395	0.127873	0	0	0.0713693	0.0736643	0.269324	0	0.339393	0.196493	0.461364	0.299653	0	0.0660383	0	0.0702359	0	0.286863	0.172188	0	0.0926234	0.005169	0.388491	0.141894	0	0	0.175749	0.161498	0	0.069324	0.135302	0.0571219	0.13515	0.0528742	0.387581	0.420987	0.0103967	0	0	0.041267
C266-NM-00	0	0.0455583	0.0188193	0	0	0.0100405	0	0.0573772	0.0142966	0	0	0.117729	0.142596	0.0452704	0.032166	0	0.0845348	0	0	0.00588679	0	0.00271917	0.0136979	0.00938527	0.0126758	0	0.0299513	0.0289995	0	0.0157857	0.00142067	0	0.0573542	0.0530943	0.0838701	0.0607605	0.0095996	0.0307166	0.0933827	0.0337204	0.0140101	0.00891043	0	0	0	0	0.0110847	0.000972877	0.0219074
C267-NM-00	0.256218	0.377494	0.286499	0.123842	0.15	0.385969	0.34879	0	0.206642	0.161089	0.208905	0.174787	0.288584	0.256392	0.336177	0.243713	0.265014	0.200873	0.361223	0.215805	0.183611	0.178305	0.263149	0.331412	0.443731	0.215486	0.0406706	0.396289	0.269653	0.262894	0.33555	0.186697	0.424005	0.295206	0.248072	0.264559	0.21903	0.404209	0.287328	0.24228	0.246831	0.292571	0.271803	0.184957	0.128101	0.264363	0.360986	0.188787	0.219889
C268-NM-Ⅰ	0.131534	0.160579	0.0854644	0.00547711	0.0502927	0.154459	0.0814915	0.0767848	0.122838	0.118064	0.149045	0.284525	0.0782395	0.149628	0.0328251	0.16014	0.126784	0	0.320303	0.237494	0.0902124	0.0765112	0.204654	0.168405	0.254834	0.185296	0	0.0232	0.161891	0.13184	0.0979137	0	0.0770891	0.162577	0	0	0.134421	0.147137	0.0582255	0.173058	0.161818	0.241273	0.134407	0	0	0.114871	0.251273	0.154552	0.472155
C269-NM-0	0.226493	0.239475	0.311515	0.37007	0.201016	0.23314	0.126732	0.0507465	0.147323	0.251537	0.234213	0.0179111	0.089388	0.250669	0.0826434	0.121521	0.383044	0.201548	0.456273	0.187025	0.245094	0.121574	0.220653	0.265277	0.296489	0.332989	0.0391011	0.157428	0.222417	0.221015	0.182954	0.143794	0.136325	0.251498	0.0176531	0.0975374	0.196214	0.256713	0.104654	0.300738	0.234721	0.472557	0.253242	0.152908	0.11591	0.088909	0.303797	0.232388	0.522169
C270-HLJ-00	0.0335865	0	0	0.0861927	0	0	0	0.108334	0.0143343	0	0	0	0.040721	0.0474866	0	0	0	0	0.0782081	0.0326622	0	0	0.0106148	0	0	0	0	0	0	0	0	0	0	0.0603215	0	0	0.133322	0	0	0	0.13211	0.145872	0.0723885	0	0	0.101324	0.00332528	0.182385	0.225841
C271-LN-Ⅲ	0.388329	0.32239	0.309642	0.271462	0.353237	0.452337	0.376338	0.188435	0.478513	0.285768	0.389954	0.495104	0.230126	0.325249	0.180435	0.291785	0.724189	0.541274	0.365598	0.19444	0.286303	0.311221	0.457614	0.514163	0.501192	0.576805	0.143162	0.231198	0.336797	0.464454	0.40033	0.401554	0.263091	0.568336	0.52163	0.48814	0.191746	0.428546	0.254933	0.226973	0.31983	0.439775	0.398496	0.405856	0.466009	0.139266	0.442419	0.339159	0.112825
C272-LN-Ⅲ	0.468062	0.125362	0.174603	0.435138	0	0.235434	0.0845028	0.0405621	0.335599	0.0266654	0.210163	0	0.185321	0.226942	0	0.294494	0.246392	0.31914	0.373743	0	0.015617	0.274788	0.366461	0.295958	0.235811	0.851722	0.0284299	0.0604463	0.405396	0.0863335	0.134329	0.172815	0.107719	0.157245	0.108694	0.255987	0.240815	0.133023	0.211279	0.0838374	0.0652127	0.366539	0.240737	0.164165	0.0446416	0.0862991	0.364775	0.402279	0.43717
C273-BJ-Ⅳ	0	0	0	0	0	0	0	0.151147	0	0	0	0	0.111216	0	0	0	0	0	0	0	0	0	0	0	0	0	0	0	0	0	0	0	0	0	0	0	0	0	0	0	0	0	0	0	0	0	0	0	0
C274-BJ-Ⅲ	0.39535	0.0511182	0.228534	0.0697271	0.0239885	0.336601	0.255196	0.254373	0.193047	0	0.148858	0.339726	0.192645	0.198939	0.090805	0.315987	0.43148	0.217137	0.15976	0.234313	0	0.180601	0.317595	0.277024	0.202625	0.261623	0.258504	0.187539	0.140097	0.37734	0.273135	0.193119	0.266112	0.32388	0.357045	0.275507	0.16064	0.179451	0.247685	0.36833	0.304764	0.495559	0.33943	0.201278	0.0642019	0.121333	0.208943	0.263776	0.117373
C275-BJ-Ⅲ	0	0.0596318	0.00958043	0	0.0314537	0	0	0.144065	0.0405051	0.0438783	0	0.140821	0	0	0	0	0.0345342	0	0	0.209485	0.0846946	0	0	0	0.0736293	0	0.0635104	0.00538108	0	0.225425	0	0.0352131	0.121395	0	0.0868345	0.0995379	0	0	0.00495738	0.0263582	0.00389298	0.0995881	0	0.0321153	0.0502134	0	0	0	0
C276-BJ-Ⅲ	0.141729	0	0.0309565	0.125106	0.0899638	0	0	0.264491	0.014067	0.105177	0.0251972	0	0	0	0	0.113822	0.00881295	0.0697695	0	0.0402556	0.0589764	0.0842303	0.050389	0.00381922	0	0	0.113293	0.0840453	0	0	0	0.151407	0.0922593	0.0937737	0	0	0.140169	0.1429	0	0	0	0	0	0.169034	0.072277	0	0	0	0.0437311
C277-LN-Ⅲ	0.270549	0.0653181	0	0	0	0.336906	0.307087	0.0503405	0.140519	0	0.122541	1.26497	0.037972	0.246002	0.136376	0.379328	0.284777	0	0.0430467	0	0	0.172103	0.388331	0.287447	0.211363	0.30472	0.086498	0.134605	0.197577	0.310967	0.306381	0	0	0.236135	0.291063	0.311505	0.173411	0.208012	0.154126	0.340631	0.171326	0.09544	0.285361	0	0	0.381567	0.148039	0.233734	0.418152
A001-IA-Ⅰ	0	0	0	0	0	0	0	0.140456	0	0	0	0	0	0	0	0	0	0	0	0	0	0	0	0	0	0	0	0	0	0	0	0	0	0	0	0	0	0	0	0	0.033169	0	0	0	0	0	0	0	0.0521738
A002-MN-Ⅰ	0	0	0	0.0953814	0	0	0	0.128754	0	0	0	0.0119217	0	0	0	0.0175291	0	0	0	0	0	0	0	0	0	0.00736562	0	0	0.0375366	0.0579152	0	0	0.117232	0	0	0	0	0	0.0307328	0	0	0.193301	0	0	0	0	0	0	0.00147761
A003-MN-Ⅰ	0	0	0	0	0	0	0	0	0	0	0	0	0	0	0	0	0	0	0	0	0	0	0	0	0	0	0	0	0	0	0	0	0	0	0.0231065	0	0.00605101	0	0	0	0	0	0	0	0	0	0	0	0.0776711
A004-MN-Ⅰ	0	0	0	0	0	0	0	0	0	0	0	0	0	0	0	0	0	0	0	0	0	0	0	0	0	0	0	0	0	0	0	0	0	0	0	0	0	0	0	0	0	0	0	0	0	0	0	0	0
A005-Ⅰ	0	0	0	0	0	0	0	0	0	0	0	0	0	0	0	0	0	0	0	0	0	0	0	0	0	0	0	0	0	0	0	0	0	0	0	0	0	0	0	0	0	0	0	0	0	0	0	0	0
A006-Ⅰ	0	0	0	0	0	0	0	0	0	0	0	0	0	0	0	0	0	0	0	0	0	0	0	0	0	0	0	0	0	0	0	0	0	0	0	0	0	0	0	0	0	0	0	0	0	0	0	0	0
A007-IA-Ⅰ	0	0	0	0	0	0	0	0.0145729	0	0	0	0	0.119533	0	0	0	0	0	0	0	0	0	0	0	0	0	0	0	0	0	0	0	0	0	0	0	0	0	0	0	0	0	0	0	0	0	0	0	0
A008-IA-Ⅰ	0	0	0	0	0	0	0	0.138913	0	0	0	0	0	0	0	0	0	0.0477617	0	0.0126401	0	0	0	0	0	0	0	0	0	0	0	0.0116804	0	0	0	0	0	0	0	0	0	0.0442233	0	0.00546094	0	0	0	0	0
A009-MN-Ⅰ	0	0	0	0	0	0	0	0	0	0	0	0	0	0	0	0	0	0	0	0	0	0	0	0	0	0	0	0	0	0	0	0	0	0	0	0	0	0	0	0	0	0	0	0	0	0	0	0	0
A010-MN-Ⅰ	0	0.0173947	0	0	0	0	0	0	0	0	0	0.00467434	0	0	0.0155558	0.00734729	0	0	0	0	0	0	0	0	0	0.136793	0.0249984	0.0383293	0.0689962	0	0	0	0	0	0	0	0	0	0	0	0	0	0	0	0	0	0	0	0
A011-OH-Ⅰ	0	0	0	0	0	0	0	0	0	0	0	0.00160273	0	0	0	0	0	0	0	0	0	0	0.0353235	0	0	0.105621	0.00990087	0	0	0.0410995	0	0	0	0	0.0113081	0	0	0	0	0	0	0	0	0	0	0.100365	0	0	0.0630674
A012-MN-Ⅰ	0	0	0.016843	0.144547	0	0	0	0	0	0	0	0	0.0679561	0	0	0	0	0	0	0	0	0	0	0	0	0.102372	0	0	0.0831431	0	0	0	0.0208289	0	0	0	0	0	0	0	0	0.0402685	0	0	0	0	0	0	0
A013-MN-Ⅰ	0	0	0	0	0	0	0	0	0	0	0	0	0	0	0	0	0	0	0	0	0	0	0	0	0	0.00853019	0	0	0	0	0	0	0	0	0	0	0	0	0	0	0	0	0	0	0	0	0	0	0
A014-MN-Ⅰ	0	0	0	0	0	0	0	0.105985	0.0657681	0	0	0	0	0	0	0	0	0	0	0	0	0	0	0	0	0.0392472	0	0	0	0	0	0	0	0	0	0	0	0	0	0	0.00519801	0	0	0	0	0	0	0	0.042385
A015-MN-Ⅰ	0.201512	0	0	0.0247638	0	0.110364	0.0513381	0.242698	0.248145	0	0.0239444	0.0814526	0	0.131607	0	0.132758	0.216081	0.0545458	0.157323	0	0	0	0.0652444	0.0786523	0	0.273039	0	0	0.115669	0.0395922	0.0794862	0.014762	0	0.16047	0.0522927	0.0142719	0.0635601	0.210327	0.00511147	0.000688691	0.00150159	0.114303	0.0877203	0.0148443	0	0.0422103	0.157223	0.206901	0.304127
A016-MN-Ⅰ	0	0.224246	0.165663	0	0	0.0576314	0.0648647	0	0	0	0	0.0709123	0	0	0.261848	0.187482	0	0.0899062	0	0.129512	0	0.0320935	0	0	0	0.0717956	0	0.205377	0.177237	0.1655	0.0533401	0.0449707	0.134063	0	0.00421681	0.111674	0	0	0.0515516	0	0	0.0545444	0	0.044333	0	0.045568	0	0	0
A017-IA-Ⅱ	0	0	0	0	0	0	0	0	0	0	0	0.00108428	0.036851	0	0	0	0	0	0	0	0	0	0	0	0	0	0	0	0	0	0	0	0	0	0	0	0	0	0	0	0	0	0	0	0	0	0	0	0
A018-Ⅱ	0	0	0	0	0	0	0	0.253697	0	0	0	0	0	0	0	0	0	0	0	0	0	0	0	0	0	0	0	0	0	0	0	0	0	0	0	0	0	0	0	0	0	0	0	0	0	0	0	0	0
A019-Ⅱ	0	0	0	0	0	0	0	0	0	0	0	0.0955325	0.00094271	0	0	0	0	0	0	0	0	0	0	0	0	0	0	0	0	0	0	0	0	0	0	0	0	0	0	0	0	0	0	0	0	0	0	0	0
A020-Ⅱ	0	0	0	0	0	0	0	0	0	0	0	0	0	0	0	0	0	0	0	0	0	0	0	0	0	0	0.0743416	0	0	0	0	0	0	0	0	0	0	0	0	0	0	0	0	0	0	0	0	0	0
A021-IL-Ⅱ	0	0	0	0.0670676	0	0	0	0	0	0	0	0	0	0	0	0	0	0	0	0	0	0	0	0	0	0	0	0	0	0	0	0	0	0	0	0	0	0	0	0	0	0	0	0	0	0	0	0	0
A022-IL-Ⅱ	0	0	0	0	0	0	0	0	0	0	0	0	0	0	0	0	0	0	0	0	0	0.00771699	0	0	0	0	0.105886	0	0	0	0	0	0	0	0	0	0	0	0	0	0	0	0	0	0	0	0	0	0
A023-MI-Ⅱ	0	0	0	0	0	0	0	0.0942556	0	0	0	0	0	0	0	0	0	0	0	0	0	0	0	0	0	0	0	0	0	0	0	0	0	0	0	0	0	0	0	0	0	0	0	0	0	0	0	0	0
A024-MI-Ⅱ	0	0	0	0	0	0	0	0.030849	0	0	0	0	0	0	0	0	0	0	0	0	0	0	0	0	0	0	0	0	0	0	0	0	0	0	0	0	0	0	0	0	0	0	0	0	0	0	0	0	0
A025-MI-Ⅱ	0.0576045	0	0	0.121717	0	0	0	0.65612	0.359774	0	0	0	0.117196	0.0700052	0	0	0.0675392	0	0.173199	0	0	0.00650326	0	0.0112609	0.0161797	0	0	0	0	0.241902	0.0675958	0	0.115042	0	0	0	0	0.0469015	0	0.00639515	0.0495217	0.175062	0	0	0	0.0398066	0.248708	0.118155	0.0964118
A026-MI-Ⅱ	0.378857	0.41585	0.328122	0.0798639	0.266536	0.556796	0.46137	0	0.0383392	0.240491	0.407396	0.279564	0.149585	0.312851	0.412129	0.665959	0.312854	0.322872	0.102726	0.0520069	0.198861	0.38252	0.535156	0.321137	0.239516	0.533132	0.641898	0.517489	0.422256	0.257099	0.361937	0.383466	0.294811	0.107209	0.406349	0.532565	0.309054	0	0.426291	0.59755	0.20792	0.201305	0.33423	0.361398	0.403693	0.529909	0.219788	0.330317	0.341014
A027-MI-Ⅱ	0.0885034	0	0	0.0174295	0	0	0.0330032	0.465092	0.276057	0	0	0.0366523	0	0	0	0	0.377074	0	0.064182	0	0	0	0.00393274	0.138183	0.103187	0.0438715	0	0	0	0.244492	0.125981	0	0.017984	0.263598	0	0	0	0.173029	0	0.147231	0.219824	0.181172	0.0480864	0	0	0	0.0813104	0.0488448	0
A028-MI-Ⅱ	0	0	0	0	0	0	0	0	0	0	0	0	0.116475	0	0	0	0	0	0	0	0	0	0	0	0	0	0	0	0	0	0	0	0	0	0	0	0	0	0.0411799	0	0	0.132019	0	0	0	0	0	0	0
A029-MI-Ⅱ	0.03363	0	0.0606595	0	0.080751	0	0	0	0	0.0834653	0.000975826	0	0	0	0	0	0	0.0522982	0.170337	0.132043	0.0869779	0	0.0126181	0.0419667	0	0	0	0	0	0	0	0.197626	0	0.0361084	0	0	0.114011	0	0	0	0.0347198	0	0	0.201995	0.107879	0.0176373	0.00255857	0.019903	0.136165
A030-MI-Ⅱ	0	0	0	0	0	0	0	0	0	0	0	0	0	0	0	0	0	0	0	0	0	0	0	0	0	0	0	0	0	0	0	0	0	0	0	0	0	0	0	0	0	0	0	0	0	0	0	0	0
A031-MI-Ⅱ	0	0	0	0	0	0	0	0	0	0	0	0	0	0	0	0	0	0	0	0	0	0	0	0	0	0	0	0	0	0	0	0	0	0	0	0	0	0	0	0	0	0	0	0	0	0	0	0	0
A032-MI-Ⅱ	0	0	0	0	0	0	0	0	0	0	0	0	0	0	0	0	0	0	0	0	0	0	0	0	0	0	0	0	0	0	0	0	0	0	0	0	0	0	0	0	0	0	0	0	0	0	0	0	0
A033-IL-Ⅱ	0	0	0	0	0	0	0	0	0	0	0	0	0.00369477	0	0	0	0	0	0	0	0	0	0	0	0	0	0.0693891	0	0	0	0	0	0	0	0	0	0	0	0	0	0	0	0	0	0	0	0	0	0
A034-IL-Ⅱ	0	0	0	0	0	0	0	0	0	0	0	0	0	0	0	0	0	0	0	0	0	0	0	0	0	0	0	0	0	0	0	0	0	0	0	0	0	0	0	0	0	0	0	0	0	0	0	0	0
A035-IL-Ⅱ	0	0	0	0	0	0	0	0	0	0	0	0	0.00294351	0	0	0	0	0	0	0	0	0	0	0	0	0	0.0769498	0	0	0	0	0	0	0	0	0	0	0	0	0	0	0	0	0	0	0	0	0	0
A036-IL-Ⅱ	0	0	0	0	0	0	0	0	0	0	0	0	0	0	0	0	0	0	0	0	0	0	0	0	0	0	0	0	0	0	0	0	0	0	0	0	0	0	0	0	0	0	0	0	0	0	0	0	0
A037-IL-Ⅱ	0	0	0	0	0	0	0	0	0	0	0	0	0	0	0	0	0	0	0	0	0	0	0	0	0	0	0	0	0	0	0	0	0	0	0	0	0	0	0	0	0	0	0	0	0	0	0	0	0
A038-IL-Ⅱ	0	0	0	0	0	0	0	0	0	0	0	0	0	0	0	0	0	0	0	0	0	0	0	0	0	0	0	0	0	0	0	0	0	0	0	0	0	0	0	0	0	0	0	0	0	0	0	0	0
A039-IL-Ⅱ	0	0	0	0	0	0	0	0	0	0	0	0	0	0	0	0	0	0	0	0	0	0	0	0	0	0	0	0	0	0	0	0	0	0	0	0	0	0	0	0	0	0	0	0	0	0	0	0	0
A040-IL-Ⅱ	0	0	0	0	0	0	0	0	0	0	0	0	0	0	0	0	0	0	0	0	0	0	0	0	0	0	0	0	0	0	0	0	0	0	0	0	0	0	0	0	0	0	0	0	0	0	0	0	0
A041-IL-Ⅱ	0	0	0	0	0	0	0	0	0	0	0	0	0	0	0	0	0	0	0	0	0	0	0	0	0	0	0	0	0	0	0	0	0	0	0	0	0	0	0	0	0	0	0	0	0	0	0	0	0
A042-IL-Ⅱ	0	0	0	0	0	0	0	0	0	0	0	0	0	0	0	0	0	0	0	0	0	0	0	0	0	0	0	0	0	0	0	0	0	0	0	0	0	0	0	0	0	0	0	0	0	0	0	0	0
A043-IL-Ⅱ	0	0	0	0	0	0	0	0	0	0	0	0	0	0	0	0	0	0	0	0	0	0	0	0	0	0	0	0	0	0	0	0	0	0	0	0	0	0	0	0	0	0	0	0	0	0	0	0	0
A044-IL-Ⅱ	0	0	0	0	0	0	0	0	0	0	0	0	0	0	0	0	0	0	0	0	0	0.0235056	0	0	0	0	0	0	0	0	0	0	0	0	0	0	0	0	0	0	0	0	0	0	0	0	0	0	0
A045-IL-Ⅱ	0	0	0	0	0	0	0	0	0	0	0	0	0	0	0	0	0	0	0	0	0	0	0	0	0	0	0	0	0	0	0	0	0	0	0	0	0	0	0	0	0	0	0	0	0	0	0	0	0
A046-IL-Ⅱ	0	0	0	0	0	0	0	0	0	0	0	0	0	0	0	0	0	0	0	0	0	0	0	0	0	0	0	0	0	0	0	0	0	0	0	0	0	0	0	0	0	0	0	0	0	0	0	0	0
A047-IL-Ⅱ	0	0	0	0	0	0	0	0	0	0	0	0	0	0	0	0	0	0	0	0	0	0	0	0	0	0	0	0	0	0	0	0	0	0	0	0	0	0	0	0	0	0	0	0	0	0	0	0	0
A048-IA-Ⅱ	0	0	0	0	0	0	0	0.127613	0	0	0	0	0	0	0	0	0	0	0	0	0	0	0	0	0	0	0	0	0	0	0	0	0	0	0	0	0	0	0	0	0	0	0	0	0	0	0	0	0
A049-IA-Ⅱ	0	0	0	0	0	0	0	0	0	0	0	0	0	0	0	0	0	0	0	0	0	0	0	0	0	0	0	0	0	0	0	0	0	0	0	0	0	0	0	0	0	0	0	0	0	0	0	0	0
A050-IA-Ⅱ	0	0	0	0	0	0	0	0	0	0	0	0	0	0	0	0	0	0	0	0	0	0	0	0	0	0	0	0	0	0	0	0	0	0	0	0	0	0	0	0	0	0	0	0	0	0	0	0	0
A051-IA-Ⅱ	0	0	0	0	0	0	0	0	0	0	0	0	0	0	0	0	0	0	0	0	0	0	0	0	0	0	0	0	0	0	0	0	0	0	0	0	0	0	0	0	0	0	0	0	0	0	0	0	0
A052-IA-Ⅱ	0	0	0	0	0	0	0	0	0	0	0	0	0	0	0	0	0	0	0	0	0	0	0	0	0	0	0	0	0	0	0	0	0	0	0	0	0	0	0	0	0	0	0	0	0	0	0	0	0
A053-IA-Ⅲ	0	0	0	0	0	0	0	0.191519	0	0	0	0	0	0	0	0	0	0	0	0	0	0	0	0	0	0	0	0	0	0	0	0	0	0	0	0	0	0	0	0	0	0	0	0	0	0	0	0	0
A054-IA-Ⅲ	0	0	0	0	0	0	0	0	0	0	0	0	0	0	0	0	0	0	0	0	0	0	0	0	0	0	0	0	0	0	0	0	0	0	0	0	0	0	0	0	0	0	0	0	0	0	0	0	0
A055-Ⅲ	0	0	0	0	0	0	0	0.439686	0	0	0	0	0	0	0	0	0	0	0	0	0	0	0	0	0	0	0	0	0	0	0	0	0	0	0	0	0	0	0	0	0	0	0	0	0	0	0	0	0
A056-IL-Ⅲ	0	0	0	0	0	0	0	0	0	0	0	0	0	0	0	0	0	0	0	0	0	0	0	0	0	0	0	0	0	0	0	0	0	0	0	0	0	0	0	0	0	0	0	0	0	0	0	0	0
A057-Ⅲ	0	0	0	0	0	0	0	0	0	0	0	0.11493	0.0293148	0	0	0	0	0	0	0	0	0	0	0	0	0	0	0	0	0	0	0	0	0	0	0	0	0	0	0	0	0	0	0	0	0	0	0	0
A058-IL-Ⅲ	0	0	0	0	0	0	0	0.350399	0.144906	0	0	0	0	0	0	0	0	0	0	0	0	0	0	0	0	0	0	0	0	0	0	0	0	0	0	0	0	0	0	0	0	0	0	0	0	0	0	0	0
A059-IL-Ⅲ	0	0	0	0	0	0	0	0	0	0	0	0	0	0	0	0	0	0	0	0	0	0	0	0	0	0	0.0603407	0	0	0	0	0	0	0	0	0	0	0	0	0	0	0	0	0	0	0	0	0	0
A060-IL-Ⅲ	0	0	0	0	0	0	0	0	0	0	0	0	0	0	0	0	0	0	0	0	0	0	0	0	0	0	0.110859	0	0	0	0	0	0	0	0	0	0	0	0	0	0	0	0	0	0	0	0	0	0
A061-IL-Ⅲ	0	0	0	0	0	0	0	0	0	0	0	0	0	0	0	0	0	0	0	0	0	0	0	0	0	0	0	0	0	0	0	0	0	0	0	0	0	0	0	0	0	0	0	0	0	0	0	0	0
A062-IL-Ⅲ	0	0	0	0	0	0	0	0	0	0	0	0.00313834	0.085194	0	0	0	0	0	0	0	0	0	0	0	0	0	0	0	0	0	0	0	0	0	0	0	0	0	0	0	0	0	0	0	0	0	0	0	0
A063-IL-Ⅲ	0	0	0	0	0	0	0	0	0	0	0	0	0.00851389	0	0	0	0	0	0	0	0	0	0	0	0	0	0	0	0	0	0	0	0	0	0	0	0	0	0	0	0	0	0	0	0	0	0	0	0
A064-IL-Ⅲ	0	0	0	0	0	0	0	0	0	0	0	0	0	0	0	0	0	0	0	0	0	0	0	0	0	0	0	0	0	0	0	0	0	0	0	0	0	0	0	0	0	0	0	0	0	0	0	0	0
A065-IL-Ⅲ	0	0	0	0	0	0	0	0	0	0	0	0	0	0	0	0	0	0	0	0	0	0	0	0	0	0	0	0	0	0	0	0	0	0	0	0	0	0	0	0	0	0	0	0	0	0	0	0	0
A066-IL-Ⅲ	0	0	0	0	0	0	0	0	0	0	0	0	0	0	0	0	0	0	0	0	0	0	0	0	0	0	0	0	0	0	0	0	0	0	0	0	0	0	0	0	0	0	0	0	0	0	0	0	0
A067-IL-Ⅲ	0	0	0	0	0	0	0	0	0	0	0	0	0	0	0	0	0	0	0	0	0	0	0	0	0	0	0	0	0	0	0	0	0	0	0	0	0	0	0	0	0	0	0	0	0	0	0	0	0
A068-IL-Ⅲ	0	0	0	0	0	0	0	0	0	0	0	0	0	0	0	0	0	0	0	0	0	0	0	0	0	0	0	0	0	0	0	0	0	0	0	0	0	0	0	0	0	0	0	0	0	0	0	0	0
A069-IL-Ⅲ	0	0	0	0	0	0	0	0.242499	0	0	0	0	0.0625643	0	0	0	0	0	0	0	0	0	0	0	0	0	0	0	0	0	0	0	0	0	0	0	0	0	0	0	0	0	0	0	0	0	0	0	0
A070-IL-Ⅲ	0	0	0	0	0	0	0	0.115161	0	0	0	0	0	0	0	0	0	0	0	0	0	0	0	0	0	0	0	0	0	0	0	0	0	0	0	0	0	0	0	0	0	0	0	0	0	0	0	0	0
A071-IL-Ⅲ	0	0	0	0	0	0	0	0	0	0	0	0	0	0	0	0	0	0	0	0	0	0	0	0	0	0	0	0	0	0	0	0	0	0	0	0	0	0	0	0	0	0	0	0	0	0	0	0	0
A072-IL-Ⅲ	0	0	0	0	0	0	0	0.252969	0.0163402	0	0	0	0	0	0	0	0	0	0	0	0	0	0	0	0	0	0	0	0	0	0	0	0	0.0606054	0	0	0	0.0269888	0	0	0	0	0	0	0	0	0	0	0
A073-IL-Ⅲ	0	0	0	0	0	0	0	0	0	0	0	0	0	0	0	0	0	0	0	0	0	0	0	0	0	0	0	0	0	0	0	0	0	0	0	0	0	0	0	0	0	0	0	0	0	0	0	0	0
A074-IL-Ⅲ	0	0	0	0	0	0	0	0	0	0	0	0	0.109016	0	0	0	0	0	0	0	0	0	0	0	0	0	0	0	0	0	0	0	0	0	0	0	0	0	0	0	0	0	0	0	0	0	0	0	0
A075-IL-Ⅲ	0	0	0	0	0	0	0	0	0	0	0	0	0	0	0	0	0	0	0	0	0	0	0	0	0	0	0	0	0	0	0	0	0	0	0	0	0	0	0	0	0	0	0	0	0	0	0	0	0
A076-IL-Ⅲ	0	0	0	0	0	0	0	0.321703	0	0	0	0	0	0	0	0	0	0	0	0	0	0	0	0	0	0	0	0	0	0	0	0	0	0	0	0	0	0	0	0	0	0	0	0	0	0	0	0	0
A077-IL-Ⅲ	0	0	0	0	0	0	0	0.182301	0	0	0	0	0	0	0	0	0	0	0	0	0	0	0	0	0	0	0	0	0	0	0	0	0	0	0	0	0	0	0	0	0	0	0	0	0	0	0	0	0
A078-IL-Ⅲ	0	0	0	0	0	0	0	0.164132	0	0	0	0	0	0	0	0	0	0	0	0	0	0	0	0	0	0	0	0	0	0	0	0	0	0	0	0	0	0	0	0	0	0	0	0	0	0	0	0	0
A079-IL-Ⅲ	0	0	0	0	0	0	0	0.205354	0	0	0	0	0	0	0	0	0	0	0	0	0	0	0	0	0	0	0	0	0	0	0	0	0	0	0	0	0	0	0	0	0	0	0	0	0	0	0	0	0
A080-MO-Ⅲ	0	0	0	0	0	0	0	0.148662	0	0	0	0	0.0700666	0	0	0	0	0	0	0	0	0	0	0	0	0	0	0	0	0	0	0	0	0	0	0	0	0	0	0	0	0	0	0	0	0.0256662	0	0	0
A081-MO-Ⅲ	0	0	0.00185862	0	0	0	0	0.173885	0	0	0	0	0	0	0	0	0	0	0	0.0655874	0	0	0	0	0	0	0	0	0	0.0627967	0	0	0	0	0	0	0	0	0	0	0	0	0	0	0	0	0	0	0
A082-MO-Ⅲ	0	0	0	0	0	0	0.01172	0	0	0	0	0	0.0610751	0	0	0	0	0	0	0	0	0.0507874	0.129185	0	0	0	0.0847091	0	0	0	0	0	0	0	0	0	0	0	0.0521995	0	0	0	0	0	0	0.111541	0	0	0
A083-MO-Ⅲ	0	0	0	0	0	0	0	0	0	0	0	0	0	0	0	0	0	0	0	0	0	0	0	0	0	0	0	0	0	0	0	0	0	0	0	0	0	0	0	0	0	0	0	0	0	0	0	0	0
A084-MO-Ⅲ	0	0	0	0	0	0	0	0.00619039	0	0	0	0	0	0	0	0	0	0	0	0	0	0	0	0	0	0	0	0	0	0	0	0	0	0	0	0	0	0	0	0	0	0	0	0	0	0	0	0	0
A085-MO-Ⅲ	0	0	0	0	0	0	0	0.00860011	0	0	0	0	0	0	0	0	0	0	0	0	0	0	0	0	0	0	0	0	0	0	0	0	0	0	0	0	0	0	0	0	0	0	0	0	0	0	0	0	0
A086-MO-Ⅲ	0	0	0	0	0	0	0	0.0266263	0	0	0	0	0	0	0	0	0	0	0	0	0	0	0	0	0	0	0	0	0	0	0	0	0	0	0	0	0	0	0	0	0	0	0	0	0	0	0	0	0
A087-IA-Ⅲ	0	0	0	0	0	0	0	0	0	0	0	0	0	0	0	0	0	0	0	0	0	0	0	0	0	0	0	0	0	0	0	0	0	0	0	0	0	0	0	0	0	0	0	0	0	0	0	0	0
A088-IA-Ⅲ	0	0	0	0	0	0	0	0.199401	0	0	0	0	0	0	0	0	0	0	0	0	0	0	0	0	0	0	0	0	0	0	0	0	0	0.0326131	0	0	0	0.105238	0	0	0	0	0	0	0	0	0	0	0
A089-Ⅳ	0	0	0	0	0	0	0.00661887	0	0	0	0	0.104164	0.0385574	0	0	0	0	0	0	0	0	0	0.103935	0	0	0.0561868	0	0	0	0.092471	0.02888	0	0	0.0163546	0.0633112	0.0488709	0.0764609	0.0577677	0	0.0656043	0.0826664	0	0.0483492	0	0	0.00868283	0	0	0.0289031
A090-IL-Ⅳ	0.111725	0.148726	0.0545088	0	0	0.0735202	0.0138643	0.252944	0.140537	0	0	0.17468	0	0	0.132034	0.182005	0.01169	0	0	0.0431538	0	0.151935	0.230052	0.0419035	0.0903397	0.19736	0	0.0434033	0.115013	0.348003	0.049092	0	0.0823707	0	0.107089	0.184765	0	0	0.16424	0.190956	0.0321473	0.259539	0.0833458	0	0	0.259197	0.0999251	0.212338	0.348991
A091-Ⅳ	0	0	0	0	0	0	0	0	0	0	0	0	0.123061	0	0	0	0	0	0	0	0	0	0	0	0	0	0	0	0	0	0	0	0	0	0	0	0	0	0.00197159	0	0	0	0	0	0	0	0	0	0
A092-IA-Ⅳ	0	0	0	0.0514752	0	0	0	0	0	0	0	0	0	0	0	0	0	0	0	0	0	0	0	0	0	0.114033	0	0	0	0	0	0	0	0	0	0	0	0	0	0	0	0.0241912	0	0	0	0	0	0	0.0483162
A093-IL-Ⅳ	0	0	0	0	0	0	0	0.0345176	0	0	0	0	0	0	0	0	0	0	0	0	0	0	0	0	0	0	0	0	0	0	0	0	0	0	0	0	0	0	0	0	0	0	0	0	0	0	0	0	0
A094-IL-Ⅳ	0	0	0	0	0	0	0	0.0228821	0	0	0	0	0	0	0	0	0	0	0	0	0	0	0	0	0	0	0	0	0	0	0	0	0	0	0	0	0	0	0	0	0	0	0	0	0	0	0	0	0
A095-IL-Ⅳ	0	0	0	0	0	0	0	0.145689	0	0	0	0	0	0	0	0	0	0	0	0	0	0	0	0	0	0	0	0	0	0	0	0	0	0	0	0	0	0	0	0	0	0	0	0	0	0	0	0	0
A096-IL-Ⅳ	0	0	0	0	0	0	0	0	0	0	0	0	0	0	0	0	0	0	0	0	0	0	0	0	0	0	0	0	0	0	0	0	0	0	0	0	0	0	0	0	0	0	0	0	0	0	0	0	0
A097-IL-Ⅳ	0	0	0	0	0	0	0	0	0	0	0	0	0	0	0	0	0	0	0	0	0	0	0	0	0	0	0	0	0	0	0	0	0	0	0	0	0	0	0	0	0	0	0	0	0	0	0	0	0
A098-IL-Ⅳ	0	0	0.00268487	0	0	0	0	0.206832	0.117908	0	0	0	0	0	0	0	0	0	0	0	0	0	0	0	0	0	0	0	0	0	0	0	0	0	0	0	0	0	0	0.0697727	0	0.0865091	0	0	0	0	0.0671741	0.0569885	0.0265153
A099-IL-Ⅳ	0	0	0	0	0	0	0	0.324511	0.0584907	0	0	0	0	0	0	0	0	0	0	0	0	0	0	0	0	0	0	0	0	0	0	0	0	0	0	0	0	0	0	0	0	0	0	0	0	0	0	0	0
A100-IL-Ⅳ	0	0	0	0	0	0	0	0	0	0	0	0	0	0	0	0	0	0	0	0	0	0	0	0	0	0	0	0	0	0	0	0	0	0	0	0	0	0	0	0	0	0	0	0	0	0	0	0	0
A101-IL-Ⅳ	0	0	0	0	0	0	0	0	0	0	0	0	0	0	0	0	0	0	0	0	0	0	0	0	0	0	0	0	0	0	0	0	0	0	0	0	0	0	0	0	0	0	0	0	0	0	0	0	0
A102-IL-Ⅳ	0	0	0	0	0	0	0	0.158488	0.0377146	0	0	0.0629891	0	0	0	0	0.136076	0	0	0	0	0	0	0	0	0	0	0	0	0	0	0	0	0.10958	0	0	0	0.1374	0	0	0.00497077	0.0726586	0	0	0	0	0	0	0.0628935
A103-IL-Ⅳ	0	0	0	0	0	0	0	0.169908	0	0	0	0	0	0	0	0	0	0	0	0	0	0	0	0	0	0	0	0	0	0	0	0	0	0	0	0	0	0.0645151	0	0	0	0.0256971	0	0	0	0	0	0	0
A104-IL-Ⅳ	0	0	0	0	0	0	0	0	0	0	0	0	0	0	0	0	0	0	0	0	0	0	0	0	0	0	0	0	0	0	0	0	0	0	0	0	0	0	0	0	0	0	0	0	0	0	0	0	0
A105-IL-Ⅳ	0	0	0	0	0	0	0	0	0	0	0	0	0.0308566	0	0	0	0	0	0	0	0	0	0	0	0	0	0	0	0	0	0	0	0	0	0	0	0	0	0	0	0	0	0	0	0	0	0	0	0
A106-IL-Ⅳ	0	0	0	0	0	0	0	0.0671627	0	0	0	0	0	0	0	0	0	0	0	0	0	0	0	0	0	0	0	0	0	0	0	0	0	0	0	0	0	0	0	0	0	0	0	0	0	0	0	0	0
A107-IL-Ⅳ	0	0	0	0	0	0	0	0.162693	0	0	0	0	0	0	0	0	0	0	0	0	0	0	0	0	0	0	0	0	0	0	0	0	0	0	0	0	0	0	0	0	0	0	0	0	0	0	0	0	0
A108-IL-Ⅳ	0	0	0	0	0	0	0	0.163981	0	0	0	0	0	0	0	0	0	0	0	0	0	0	0	0	0	0	0	0	0	0	0	0	0	0	0	0	0	0	0	0	0	0	0	0	0	0	0	0	0
A109-IL-Ⅳ	0	0	0	0	0	0	0	0.00604653	0	0	0	0.0885419	0	0	0	0	0	0	0	0	0	0	0	0	0	0	0	0	0	0	0	0	0	0	0	0	0	0	0	0	0	0	0	0	0	0	0	0	0
A110-IL-Ⅳ	0	0	0	0	0	0	0	0	0	0	0	0	0	0	0	0	0	0	0	0	0	0	0	0	0	0	0	0	0	0	0	0	0	0	0	0	0	0	0	0	0	0	0	0	0	0	0	0	0
A111-IL-Ⅳ	0	0	0	0	0	0	0	0.14842	0	0	0	0	0	0	0	0	0	0	0	0	0	0	0	0	0	0	0	0	0	0	0	0	0	0	0	0	0	0	0	0	0	0	0	0	0	0	0	0	0
A112-IL-Ⅳ	0	0	0	0	0	0	0	0.0205501	0	0	0	0	0	0	0	0	0	0	0	0	0	0	0	0	0	0	0	0	0	0	0	0	0	0	0	0	0	0	0	0	0	0	0	0	0	0	0	0	0
A113-IL-Ⅳ	0	0	0	0	0	0	0	0.119007	0	0	0	0.0138971	0.00439627	0	0	0	0	0	0	0	0	0	0	0	0	0	0	0	0	0	0	0	0	0	0	0	0	0	0	0	0	0	0	0	0	0	0	0	0
A114-IL-Ⅳ	0	0	0	0	0	0	0	0.101373	0	0	0	0	0	0	0	0	0	0	0	0	0	0	0	0	0	0	0	0	0	0	0	0	0	0	0	0	0	0	0	0	0	0	0	0	0	0	0	0	0
A115-IL-Ⅳ	0	0	0	0	0	0	0	0.174747	0	0	0	0	0	0	0	0	0	0	0	0	0	0	0	0	0	0	0	0	0	0	0	0	0	0	0	0	0	0	0	0	0	0	0	0	0	0	0	0	0
A116-IL-Ⅳ	0	0	0	0	0	0	0	0	0	0	0	0	0	0	0	0	0	0	0	0	0	0	0	0	0	0	0	0	0	0	0	0	0	0	0	0	0	0	0	0	0	0	0	0	0	0	0	0	0
A117-IL-Ⅳ	0	0	0	0	0	0	0	0.14563	0	0	0	0	0	0	0	0	0	0	0	0	0	0	0	0	0	0	0	0	0	0	0	0	0	0	0	0	0	0	0	0	0	0	0	0	0	0	0	0	0
A118-IL-Ⅳ	0	0	0	0	0	0	0	0.0186625	0	0	0	0	0	0	0	0	0	0	0	0	0	0	0	0	0	0	0	0	0	0	0	0	0	0	0	0	0	0	0	0	0	0	0	0	0	0	0	0	0
A119-IL-Ⅳ	0	0	0	0	0	0	0	0	0	0	0	0	0	0	0	0	0	0	0	0	0	0	0	0	0	0	0	0	0	0	0	0	0	0	0	0	0	0	0	0	0	0	0	0	0	0	0	0	0
A120-IL-Ⅳ	0	0	0	0	0	0	0	0.0907299	0	0	0	0.0423023	0	0	0	0	0	0	0	0	0	0	0	0	0	0	0	0	0	0	0	0	0	0	0	0	0	0	0	0	0	0	0	0	0	0	0	0	0
A121-IL-Ⅳ	0	0	0	0.0445257	0	0	0.024852	0.13808	0.112648	0	0	0.265213	0.246063	0	0	0	0.0491779	0	0.0253949	0	0	0.0377319	0.168075	0.0561648	0	0	0	0	0	0	0	0	0	0.0710691	0.141429	0	0	0.0356328	0.0795611	0.17677	0.0457198	0	0	0	0	0.012126	0	0	0
A122-MO-Ⅳ	0	0	0	0	0	0	0	0	0	0	0	0	0.0444884	0	0	0	0	0	0	0	0	0.0368549	0.115345	0	0	0	0.0653417	0	0	0	0	0	0	0	0	0	0	0	0.051499	0	0	0	0	0	0	0.0900926	0	0	0
A123-MO-Ⅳ	0	0	0	0	0	0	0.0597837	0.0631209	0.134817	0	0	0	0.171284	0	0	0	0	0	0	0	0	0.0334898	0.149403	0.0113665	0	0	0	0	0	0	0.0506258	0	0	0	0.0607755	0	0	0	0.0224024	0.057257	0	0	0	0	0	0.0608185	0	0	0
A124-MO-Ⅳ	0	0	0	0	0	0	0	0.0700457	0	0	0	0.0256412	0.0126308	0	0	0	0	0	0	0	0	0	0	0	0	0	0	0	0	0.0491026	0	0	0	0	0	0	0	0	0	0	0	0	0	0	0	0	0	0	0
A125-MO-Ⅳ	0	0	0	0	0	0	0	0.0161796	0	0	0	0	0	0	0	0	0	0	0	0	0	0	0.0685136	0	0	0.142676	0	0	0	0.0207083	0	0	0	0	0	0	0	0	0	0	0	0	0	0	0	0	0	0	0
A126-MO-Ⅳ	0	0	0	0	0	0	0	0	0	0	0	0	0	0	0	0	0	0	0	0	0	0	0	0	0	0	0	0	0	0	0	0	0	0	0	0	0	0	0	0	0	0	0	0	0	0	0	0	0
A127-MO-Ⅳ	0	0	0	0	0	0	0	0.0364865	0	0	0	0	0	0	0	0	0	0	0	0	0	0	0	0	0	0	0	0	0	0	0	0	0	0	0	0	0	0	0	0	0	0	0	0	0	0	0	0	0
A128-AR-Ⅳ	0.0843519	0.0830881	0.104814	0	0	0.278716	0.155911	0.283743	0.279586	0	0.0390485	0.313912	0.0349102	0	0.108844	0.215056	0.31485	0.122241	0.00549743	0.00247488	0	0.0545921	0.0727968	0.102331	0.203804	0.280866	0.0134987	0.1193	0.163998	0.378376	0.206594	0	0.163742	0.0844132	0.094136	0.0163725	0	0	0.130613	0.189779	0.189596	0.460016	0.252733	0	0	0.140003	0.105259	0	0
A129-AR-Ⅳ	0	0.0694559	0	0	0	0	0.078375	0.0537819	0.0383734	0	0	0.211279	0	0	0.122352	0	0.197146	0.0439932	0	0	0	0.080119	0.117255	0.0910348	0	0.0472354	0.0216737	0.0669252	0.048179	0.076532	0	0.057936	0.032264	0.0623917	0.25779	0.221036	0	0	0.0970384	0.187269	0.00801764	0.00487517	0.00626561	0.0609687	0.0670473	0.0239789	0.00891764	0	0
A130-AR-Ⅳ	0	0.0706862	0	0	0	0	0.0796054	0.0541422	0.038951	0	0	0.21285	0	0	0.1211	0	0.198551	0.0437586	0	0	0	0.0796872	0.11897	0.0927534	0	0.0480512	0.0210246	0.0643928	0.0466893	0.0769756	0	0.0577014	0.0308956	0.0632794	0.258457	0.222485	0	0	0.0979756	0.185688	0.0070063	0.00631333	0.00713562	0.0607342	0.0664395	0.0219829	0.0102694	0	0
A131-AR-Ⅳ	0	0	0	0	0	0.0013314	0	0.108859	0.00381739	0	0	0.105018	0.024662	0	0.0448319	0	0	0	0	0	0	0	0	0	0	0	0	0	0	0	0	0	0	0	0	0	0	0	0.0264696	0.0761687	0	0.0146297	0	0	0	0	0.00326971	0	0
A132-AR-Ⅳ	0	0.0162837	0	0	0	0	0	0.0381035	0	0	0	0	0	0	0	0	0	0	0	0	0	0	0	0	0	0	0	0	0	0	0	0	0	0	0	0	0	0	0	0	0	0	0	0	0	0	0	0	0
A133-MN-Ⅰ	0	0	0	0.0978854	0	0	0	0.132595	0	0	0	0.00801101	0	0	0	0.0200117	0.00269749	0	0	0	0	0	0	0	0	0.00663929	0	0	0.0354874	0.0557769	0	0	0.111345	0	0	0	0	0	0.0332052	0	0	0.188759	0	0	0	0	0	0	0
A134-Ⅰ	0	0	0	0	0	0	0	0	0	0	0	0	0	0	0	0	0	0	0	0	0	0	0	0	0	0	0	0	0	0	0	0	0	0	0	0	0	0	0	0	0	0	0	0	0	0	0	0	0
A135-IA-Ⅰ	0	0	0	0	0	0	0	0	0	0	0	0	0	0	0	0	0	0	0	0	0	0	0	0	0	0	0	0	0	0	0	0	0	0	0	0	0	0	0	0	0	0	0	0	0	0	0	0	0
A136-IA-Ⅰ	0	0	0	0	0	0	0	0.0576206	0	0	0	0	0	0	0	0	0	0	0	0	0	0	0	0	0	0	0	0	0	0	0	0	0	0	0	0	0	0	0	0	0	0	0	0	0	0	0	0	0
A137-IA-Ⅰ	0	0	0	0	0	0	0	0.0307045	0	0	0	0	2.16105e-05	0	0	0	0	0	0	0	0	0	0	0	0	0	0	0	0	0	0	0	0	0	0	0	0	0	0	0	0	0	0	0	0	0	0	0	0
A138-IA-Ⅰ	0.0399611	0.0534386	0.0516989	0.0456226	0	0.0111707	0	0.117631	0.0517724	0	0	0.138413	0.155604	0	0.0457388	0.00476676	0.119702	0	0	0	0	0.0344356	0.014303	0.0103752	0.00687968	0.00514657	0.0300577	0.0486064	0	0.0645853	0	0.007725	0.0937625	0.127562	0.156903	0.0976189	0	0.120666	0.122225	0.0274077	0	0.0147949	0.00879658	0.00858412	0	0.0280928	0.033065	0.0269138	0.00688934
A139-IA-Ⅰ	0	0	0	0	0	0	0	0	0	0	0	0	0	0	0	0	0	0	0	0	0	0	0	0	0	0	0	0	0	0	0	0	0	0	0	0	0	0	0	0	0	0	0	0	0	0	0	0	0
A140-IA-Ⅰ	0	0	0	0	0	0	0	0	0	0	0	0	0	0	0	0	0	0	0	0	0	0	0	0	0	0	0	0	0	0	0	0	0	0	0	0	0	0	0	0	0	0	0	0	0	0	0	0	0
A141-IA-Ⅰ	0	0	0	0	0	0	0	0	0	0	0	0	0	0	0	0	0	0	0	0	0	0	0	0	0	0	0	0	0	0	0	0	0	0	0	0	0	0	0	0	0	0	0	0	0	0	0	0	0
A142-IA-Ⅰ	0	0	0	0	0	0	0	0	0	0	0	0	0	0	0	0	0	0	0	0	0	0	0	0	0	0	0	0	0	0	0	0	0	0	0	0	0	0	0	0	0	0	0	0	0	0	0	0	0
A143-IA-Ⅰ	0.0322005	0.0544881	0.0374565	0.0446484	0	0.0119057	0	0.0946675	0.0433263	0	0	0.122859	0.166539	0	0.0410632	0.0189392	0.0883793	0	0	0.00330845	0	0.018316	0	0	0	0.00438061	0.0257191	0.0398134	0	0.0617119	0	0.00415853	0.0776941	0.0918706	0.13407	0.0957966	0	0.0756807	0.124023	0.0288583	0	0.00699233	0	0.00311018	0	0.0136713	0.0359517	0.0235091	0.00373034
A144-IA-Ⅰ	0.0333269	0.0447149	0.0518356	0.0569768	0	0.0120568	0	0.123301	0.0552416	0	0	0.13981	0.19094	0	0.0389101	0.00281763	0.102559	0	0	0	0	0.0292677	0.00947215	0.0038224	0.0143827	0.0175903	0.0281214	0.0481524	0	0.0585905	0	0	0.104398	0.115487	0.179338	0.0995615	0	0.10306	0.141271	0.0395365	0	0.0180882	0.0151601	0.0021067	0	0.0273802	0.0280618	0.0227202	0.0156064
A145-IA-Ⅰ	0	0	0	0	0	0	0	0.270495	0.0100192	0	0	0	0	0	0	0	0	0	0	0	0	0	0	0	0	0	0	0	0	0	0	0	0	0	0	0	0	0	0	0	0	0	0	0	0	0	0	0	0
A146-IA-Ⅰ	0	0	0	0	0	0	0	0	0	0	0	0	0	0	0	0	0	0	0	0	0	0	0	0	0	0	0	0	0	0	0	0	0	0	0	0	0	0	0	0	0	0	0	0	0	0	0	0	0
A147-IA-Ⅰ	0	0	0	0	0	0	0	0.0187611	0	0	0	0	0	0	0	0	0	0	0	0	0	0	0	0	0	0	0	0	0	0	0	0	0	0	0	0	0	0	0	0	0	0	0	0	0	0	0	0	0
A148-IA-Ⅰ	0	0	0	0	0	0	0	0.234323	0.0112693	0	0	0	0	0	0	0	0	0	0	0.082101	0	0	0	0	0	0	0	0	0	0	0	0	0.0607081	0	0	0	0	0	0	0	0	0	0	0	0	0	0	0	0
A149-IA-Ⅰ	0.00763755	0.0298365	0.0587826	0.0215553	0	0	0	0.0898631	0.0330631	0	0	0.0745686	0.121747	0	0.0360569	0	0.0654399	0.0151662	0	0.0129307	0	0.00194159	0	0	0.00456336	0.000108954	0.0229206	0.041984	0	0.0402903	0	0.0231481	0.0809467	0.0921426	0.130099	0.0702697	0	0.0622131	0.0874132	0.0314978	0	0.0027175	0.0107194	0.025382	0	0	0.0139332	0.00149699	0.00307534
A150-IA-Ⅰ	0	0	0	0	0	0	0	0.231975	0	0	0	0	0	0	0	0	0	0	0	0	0	0	0	0	0	0	0	0	0	0	0	0	0	0	0	0	0	0	0	0	0	0	0	0	0	0	0	0	0
A151-IA-Ⅰ	0	0	0	0	0	0	0	0	0	0	0	0	0	0	0	0	0	0	0	0	0	0	0	0	0	0	0	0	0	0	0	0	0	0	0	0	0	0	0	0	0	0	0	0	0	0	0	0	0
A152-IA-Ⅰ	0	0	0	0	0	0	0	0	0	0	0	0	0	0	0	0	0	0	0	0	0	0	0	0	0	0	0	0	0	0	0	0	0	0	0	0	0	0	0	0	0	0	0	0	0	0	0	0	0
A153-IA-Ⅰ	0	0	0	0	0	0	0	0.276635	0.160252	0	0	0	0	0	0	0	0.0815785	0.01679	0.0323543	0	0	0	0	0.0273825	0	0	0	0	0	0	0	0	0	0.13741	0	0	0	0.156338	0	0.0379449	0.0291215	0	0	0	0	0	0.197686	0.133781	0.158359
A154-MN-Ⅰ	0	0	0	0	0	0	0	0.285778	0.0985484	0	0	0.237028	0.119655	0	0	0	0	0	0	0	0	0	0	0	0	0	0	0	0	0	0	0	0	0	0	0	0	0	0	0	0	0	0	0	0	0	0	0	0
A155-MN-Ⅰ	0.0436841	0.0412957	0.0411574	0.0468191	0	0	0	0.0971475	0.0474317	0	0	0.0988049	0.158443	0	0.0365772	0.00420928	0.0913053	0	0	0	0	0.0248588	0	0.00318037	0.00886837	0.00327808	0.0207801	0.0413898	0	0.0374386	0	0.0105042	0.0747201	0.113916	0.144877	0.0661111	0.00111019	0.0898896	0.108305	0.018051	0	0.0366169	0.0219781	0.0135914	0	0.00589226	0.0363778	0.0212426	0
A156-MN-Ⅰ	0	0	0	0.021459	0	0	0	0	0	0	0	0	0	0	0	0	0	0	0	0	0	0	0	0	0	0	0	0	0	0	0	0	0	0	0	0	0	0	0	0	0	0	0	0	0	0	0	0	0
A157-MN-Ⅰ	0	0	0	0	0	0	0	0	0	0	0	0	0.161766	0	0	0	0	0	0	0	0	0	0	0	0	0	0	0	0	0	0	0	0	0	0	0	0	0	0	0	0	0	0	0	0	0	0	0	0
A158-MN-Ⅰ	0	0	0	0	0	0	0	0	0	0	0	0	0	0	0	0	0	0	0	0	0	0	0	0	0	0	0	0	0	0	0	0	0	0	0	0	0	0	0	0	0	0	0	0	0	0	0	0	0
A159-MN-Ⅰ	0	0	0	0	0	0	0	0	0	0	0	0	0	0	0	0	0	0	0	0.03456	0	0	0	0	0	0	0	0	0	0	0	0	0.00170611	0	0	0	0	0	0	0	0	0	0	0	0	0	0	0	0
A160-MN-Ⅰ	0	0	0	0	0	0	0	0	0	0	0	0	0.0467659	0	0.0298041	0	0	0	0	0	0	0	0.0102409	0	0.0765066	0	0	0	0	0	0	0	0	0	0	0	0	0	0	0.0178072	0	0	0	0	0	0	0	0	0
A161-MN-Ⅰ	0	0.0526202	0	0.0332256	0	0	0	0	0	0.0151435	0	0	0	0	0	0	0	0	0	0	0	4.19456e-05	0	0	0	0.0872483	0.0897665	0	0.0542422	0	0	0.036837	0	0	0.0998253	0.154566	0.0230517	0	0.0222881	0	0	0	0	0.0449914	0.0282196	0	0	0	0
A162-MN-Ⅰ	0	0	0	0	0	0	0	0	0	0	0	0	0	0	0	0	0	0	0	0	0	0	0	0	0	0	0	0	0	0	0	0	0	0	0	0	0	0	0	0	0	0	0	0	0	0	0	0	0
A163-MN-Ⅰ	0	0.0155758	0	0	0.00534746	0	0.0121932	0	0	0	0	0	0	0	0	0	0	0	0	0	0	0	0	0	0	0	0	0	0	0	0	0	0	0	0	0	0	0	0	0	0	0	0	0	0	0	0	0	0
A164-MN-Ⅰ	0	0.129702	0.00253905	0	0	0	0	0	0	0	0	0	0	0	0.144154	0.0264654	0	0	0	0	0	0.0709731	0	0	0	0.0555989	0	0.0744938	0.100116	0	0	0	0	0	0	0	0	0	0	0	0	0	0	0	0	0.09976	0	0	0.0337663
A165-MN-Ⅰ	0	0	0	0	0	0	0	0.0162998	0	0	0	0	0	0	0	0	0	0	0	0	0	0	0	0	0	0	0	0	0	0	0	0	0	0	0	0	0	0	0	0	0	0	0	0	0	0	0	0	0
A166-MN-Ⅰ	0	0	0	0	0	0	0	0.00426267	0	0	0	0	0.259166	0	0	0	0.119217	0	0	0	0	0	0	0.00160998	0	0.159087	0	0	0	0	0	0	0	0.330794	0.0160057	0	0	0.0554373	0	0.0529522	0.121526	0	0	0	0	0	0	0	0
A167-MN-Ⅰ	0	0	0	0	0	0	0	0.240202	0	0	0	0	0.0441068	0	0	0	0	0	0.0128578	0.0466746	0	0	0	0	0	0	0	0	0	0	0	0	0	0	0	0	0	0	0	0.198193	0.109604	0	0	0	0	0	0.0648024	0	0
A168-MN-Ⅰ	0	0	0	0	0	0	0	0.0700546	0	0	0	0.10988	0.0170441	0	0	0	0.0892977	0	0	0.0679218	0	0	0	0	0	0	0	0	0	0	0	0	0	0.182946	0	0	0	0.108612	0	0.00574396	0.12077	0.073489	0	0	0	0	0	0	0
A169-MN-Ⅰ	0	0	0	0	0	0	0	0	0	0	0	0	0	0	0	0	0.0136287	0	0	0.000909153	0	0	0	0	0	0	0	0	0	0	0	0	0	0	0	0	0	0	0	0	0	0	0	0	0	0	0	0	0
A170-IA-Ⅱ	0	0	0	0	0	0	0	0	0	0	0	0	0.0244634	0	0	0	0	0	0	0	0	0	0	0	0	0	0	0	0	0	0	0	0	0	0	0	0	0	0	0	0	0	0	0	0	0	0	0	0
A171-Ⅱ	0	0	0	0	0	0	0	0.244918	0.00137945	0	0	0	0	0	0	0	0	0	0	0	0	0	0	0	0	0	0	0	0	0	0	0	0	0	0	0	0	0	0	0	0	0	0	0	0	0	0	0	0
A172-IL-Ⅱ	0	0	0	0	0	0	0	0	0	0	0	0	0	0	0	0	0	0	0	0	0	0	0	0	0	0	0.0709085	0	0	0	0	0	0	0	0	0	0	0	0	0	0	0	0	0	0	0	0	0	0
A173-IL-Ⅱ	0	0	0	0	0	0	0	0.340705	0.098224	0	0	0	0	0	0	0	0	0	0	0	0	0	0	0	0	0	0	0	0	0	0	0	0	0	0	0	0	0	0	0	0	0	0	0	0	0	0	0	0
A174-IL-Ⅱ	0	0	0	0	0	0	0	0.0184254	0	0	0	0	0	0	0	0	0	0	0	0	0	0	0	0	0	0	0	0	0	0	0	0	0	0.0128271	0	0	0	0	0	0	0	0	0	0	0	0	0	0	0
A175-IL-Ⅱ	0	0	0	0.0705768	0	0	0	0	0	0	0	0	0	0	0	0	0	0	0	0	0	0	0	0	0	0	0	0	0	0	0	0	0	0	0	0	0	0	0	0	0	0	0	0	0	0	0	0	0
A176-IL-Ⅱ	0	0	0	0	0	0	0	0.00456254	0	0	0	0	0	0	0	0	0	0	0	0	0	0	0	0	0	0	0	0	0	0	0	0	0	0	0	0	0	0	0	0	0	0	0	0	0	0	0	0	0
A177-IL-Ⅱ	0	0	0	0	0	0	0	0	0	0	0	0	0	0	0	0	0	0	0	0	0	0	0	0	0	0	0	0	0	0	0	0	0	0	0	0	0	0	0	0	0	0	0	0	0	0	0	0	0
A178-IL-Ⅱ	0	0	0	0	0	0	0	0	0	0	0	0	0	0	0	0	0	0	0	0	0	0	0	0	0	0	0	0	0	0	0	0	0	0	0	0	0	0	0	0	0	0	0	0	0	0	0	0	0
A179-IL-Ⅱ	0	0	0	0	0	0	0	0	0	0	0	0	0	0	0	0	0	0	0	0	0	0	0	0	0	0	0.0814916	0	0	0	0	0	0	0	0	0	0	0	0	0	0	0	0	0	0	0	0	0	0
A180-IL-Ⅱ	0	0	0	0	0	0	0	0	0	0	0	0	0	0	0	0	0	0	0	0	0	0	0	0	0	0	0.0745766	0	0	0	0	0	0	0	0	0	0	0	0	0	0	0	0	0	0	0	0	0	0
A181-IL-Ⅱ	0	0	0	0	0	0	0	0	0	0	0	0	0	0	0	0	0	0	0	0	0	0	0	0	0	0	0.0664389	0	0	0	0	0	0	0	0	0	0	0	0	0	0	0	0	0	0	0	0	0	0
A182-IL-Ⅱ	0	0	0	0	0	0	0	0.0207306	0	0	0	0	0	0	0	0	0	0	0	0	0	0	0	0	0	0	0	0	0	0	0	0	0	0	0	0	0	0	0	0	0	0	0	0	0	0	0	0	0
A183-IL-Ⅱ	0	0	0	0	0	0	0	0	0	0	0	0	0	0	0	0	0	0	0	0	0	0	0	0	0	0	0.0404898	0	0	0	0	0	0	0	0	0	0	0	0	0	0	0	0	0	0	0	0	0	0
A184-IL-Ⅱ	0	0	0	0	0	0	0	0	0	0	0	0	0	0	0	0	0	0	0	0	0.0153979	0	0	0	0	0	0	0	0	0	0	0	0	0	0	0	0	0	0	0	0	0	0	0	0.00119139	0	0	0	0
A185-IL-Ⅱ	0	0	0	0	0	0	0	0	0	0	0	0	0	0	0	0	0	0	0	0	0	0	0	0	0	0	0	0	0	0	0	0	0	0	0	0	0	0	0	0	0	0	0	0	0	0	0	0	0
A186-IA-Ⅱ	0	0	0	0.0226458	0	0	0	0	0	0	0	0	0	0	0	0	0	0	0	0	0	0	0	0	0	0	0.184993	0	0	0	0	0.0342101	0	0	0	0	0	0	0	0	0	0	0	0.0387238	0.0122101	0	0	0	0
A187-IA-Ⅱ	0	0	0.00561107	0.0117073	0	0	0	0.145124	0.00536136	0	0	0	0	0	0	0	0	0.0601984	0	0.0162342	0	0	0	0	0	0	0	0	0	0	0	0.0141208	0	0	0	0	0	0	0	0	0	0.0551887	0	0.00718691	0	0	0	0	0
A188-IA-Ⅱ	0	0	0	0	0	0	0	0	0	0	0	0	0	0	0	0	0	0	0	0	0	0	0	0	0	0	0	0	0	0	0	0	0	0	0	0	0	0	0	0	0	0	0	0	0	0	0	0	0
A189-IA-Ⅱ	0	0	0	0	0	0	0	0	0	0	0	0	0	0	0	0	0	0	0	0	0	0	0	0	0	0	0	0	0	0	0	0	0	0	0	0	0	0	0	0	0	0	0	0	0	0	0	0	0
A190-MI-Ⅱ	0	0	0	0	0	0	0	0	0	0	0	0	0	0	0	0	0	0	0	0	0	0	0	0	0	0	0	0	0	0	0	0	0	0	0	0	0	0	0	0	0	0	0	0	0	0	0	0	0
A191-MI-Ⅱ	0	0	0	0	0	0	0	0	0	0	0	0.101929	0	0	0	0	0	0	0	0	0	0	0	0	0	0	0	0	0	0	0	0	0	0	0	0	0	0	0	0	0	0	0	0	0	0	0	0	0
A192-Ⅱ	0.162359	0.100892	0.0254128	0.0704812	0	0.098896	0.0459188	0.0395527	0.126614	0	0.0483049	0.00291225	0.0150978	0.0686783	0.043736	0.0919115	0.12001	0.0705979	0.0803499	0	0	0.0920592	0.168595	0.097248	0.11099	0.205858	0.00400656	0.0368871	0.121206	0.127128	0.0812979	0	0	0	0.0754679	0.0426635	0.0775358	0	0.0957819	0.0440561	0	0.149745	0.0702565	0	0	0.198528	0.161351	0.207505	0.159477
A193-IA-Ⅱ	0	0	0	0	0	0	0	0	0	0.0294819	0	0	0	0	0	0	0	0	0	0.106357	0.0454464	0	0	0	0	0	0	0	0	0	0	0	0	0	0	0	0	0	0	0	0	0	0	0	0	0	0	0	0
A194-IA-Ⅱ	0	0	0	0	0	0	0	0.164078	0	0	0	0	0	0	0	0	0	0	0	0	0	0	0	0	0	0	0	0	0	0	0	0	0	0	0	0	0	0	0	0	0	0	0	0	0	0	0	0	0
A195-IA-Ⅱ	0	0	0	0	0	0	0	0	0	0	0	0	0	0	0	0	0	0	0	0	0	0	0	0	0	0	0	0	0	0	0	0	0	0	0	0	0	0	0	0	0	0	0	0	0	0	0	0	0
A196-IA-Ⅱ	0	0	0	0	0	0	0	0.107816	0	0	0	0	0	0	0	0	0	0	0	0	0	0	0	0	0	0	0	0	0	0	0	0	0	0	0	0	0	0	0	0	0	0	0	0	0	0	0	0	0
A197-IA-Ⅱ	0	0	0	0	0	0	0	0	0	0	0	0	0	0	0	0	0	0	0	0	0	0	0	0	0	0	0	0	0	0	0	0	0	0	0	0	0	0	0	0	0	0	0	0	0	0	0	0	0
A198-IA-Ⅱ	0	0	0	0	0	0	0	0.137974	0	0	0	0	0	0	0	0	0	0	0	0	0	0	0	0	0	0	0	0	0	0	0	0	0	0	0	0	0	0	0	0	0	0	0	0	0	0	0	0	0
A199-IA-Ⅱ	0	0	0	0	0	0	0	0	0	0	0	0	0	0	0	0	0	0	0	0	0	0	0	0	0	0	0	0	0	0	0	0	0	0	0	0	0	0	0	0	0	0	0	0	0	0	0	0	0
A200-IA-Ⅱ	0	0	0	0	0	0	0	0	0	0	0	0	0.0845126	0	0	0	0	0	0	0	0	0	0	0	0	0	0	0	0	0	0	0	0	0	0	0	0	0	0	0	0	0	0	0	0	0	0	0	0
A201-IA-Ⅱ	0	0	0	0	0	0	0	0.0323357	0	0	0	0	0	0	0	0	0	0	0	0	0	0	0	0	0	0	0	0	0	0	0	0	0	0	0	0	0	0	0	0	0	0	0	0	0	0	0	0	0
A202-IA-Ⅱ	0	0	0	0	0	0	0	0	0	0	0	0	0	0	0	0	0	0	0	0	0	0	0	0	0	0	0	0	0	0	0	0	0	0	0	0	0	0	0	0	0	0	0	0	0	0	0	0	0
A203-IA-Ⅱ	0	0	0	0	0	0	0	0.0176271	0	0	0	0	0	0	0	0	0	0	0	0	0	0	0	0	0	0	0	0	0	0	0	0	0	0	0	0	0	0	0	0	0	0	0	0	0	0	0	0	0
A204-IA-Ⅱ	0	0	0	0	0	0	0	0	0	0	0	0	0	0	0	0	0	0	0	0	0	0	0	0	0	0	0	0	0	0	0	0	0	0	0	0	0	0	0	0	0	0	0	0	0	0	0	0	0
A205-IA-Ⅱ	0	0	0	0	0	0	0	0	0	0	0	0	0	0	0	0	0	0	0	0	0	0	0	0	0	0	0	0	0	0	0	0	0	0	0	0	0	0	0	0	0	0	0	0	0	0	0	0	0
A206-IA-Ⅱ	0	0	0	0	0	0	0	0	0	0	0	0	0	0	0	0	0	0	0	0	0	0	0	0	0	0	0	0	0	0	0	0	0	0	0	0	0	0	0	0	0	0	0	0	0	0	0	0	0
A207-IA-Ⅱ	0	0	0	0	0	0	0	0.0933349	0	0	0	0	0	0	0	0	0	0	0	0	0	0	0	0	0	0	0	0	0	0	0	0	0	0	0	0	0	0	0	0	0	0	0	0	0	0	0	0	0
A208-IA-Ⅱ	0	0	0	0	0	0	0	0	0	0	0	0.0111449	0.161208	0	0	0	0	0	0	0	0	0	0	0	0	0	0	0	0	0	0	0	0	0	0	0	0	0	0	0	0	0	0	0	0	0	0	0	0
A209-IA-Ⅱ	0	0	0	0	0	0	0	0	0	0	0	0	0	0	0	0	0	0	0	0	0	0	0	0	0	0	0	0	0	0	0	0	0	0	0	0	0	0	0	0	0	0	0	0	0	0	0	0	0
A210-IA-Ⅱ	0	0	0	0	0	0	0	0.0297692	0	0	0	0	0	0	0	0	0	0	0	0	0	0	0	0	0	0	0	0	0	0	0	0	0	0	0	0	0	0	0	0	0	0	0	0	0	0	0	0	0
A211-IA-Ⅱ	0	0	0	0	0	0	0	0	0	0	0	0	0	0	0	0	0	0	0	0	0	0	0	0	0	0	0	0	0	0	0	0	0	0	0	0	0	0	0	0	0	0	0	0	0	0	0	0	0
A212-IA-Ⅱ	0	0	0	0	0	0	0	0	0	0	0	0	0	0	0	0	0	0	0	0	0	0	0	0	0	0	0	0	0	0	0	0	0	0	0	0	0	0	0	0	0	0	0	0	0	0	0	0	0
A213-IA-Ⅱ	0	0	0	0	0	0	0	0	0	0	0	0	0	0	0	0	0	0	0	0	0	0	0	0	0	0	0	0	0	0	0	0	0	0	0	0	0	0	0	0	0	0	0	0	0	0	0	0	0
A214-IA-Ⅱ	0	0	0	0	0	0	0	0	0	0	0	0	0	0	0	0	0	0	0	0.0212111	0	0	0	0	0	0	0	0	0	0	0	0	0	0	0	0	0	0	0	0	0	0	0	0	0	0	0	0	0
A215-IA-Ⅱ	0	0	0	0	0	0	0	0	0	0	0	0	0	0	0	0	0	0	0	0.0710654	0	0	0	0	0	0	0	0	0	0	0	0	0	0	0	0	0	0	0	0	0	0	0	0	0	0	0	0	0
A216-IA-Ⅱ	0.021931	0.0749631	0.0665926	0.0143623	0	0.0529852	0	0.260876	0.237483	0	0	0	0	0.000965933	0.0261673	0	0.0962491	0	0.082877	0	0	0	0.0341178	0.0284094	0.0626208	0.385828	0	0	0.197059	0.0740454	0	0	0	0.0500845	0	0	0	0.00349338	0	0.0371868	0.0786823	0.260494	0.0165527	0	0	0	0.359625	0.278766	0.33708
A217-IA-Ⅱ	0.0408785	0	0	0	0	0	0	0.208455	0.123853	0	0	0	0	0	0	0	0	0	0	0	0	0	0	0	0	0.0088483	0	0	0	0	0	0	0	0	0	0	0	0.0657584	0	0	0	0.167721	0.00986283	0	0	0	0.0988592	0.0421081	0.0506987
A218-IA-Ⅱ	0	0	0	0	0	0	0	0	0	0	0	0	0	0	0	0	0	0	0	0	0	0	0	0	0	0	0	0	0	0	0	0	0	0	0	0	0	0	0	0	0	0	0	0	0	0	0	0	0
A219-IA-Ⅱ	0	0	0	0	0	0	0	0	0	0	0	0	0	0	0	0	0	0	0	0	0	0	0	0	0	0	0	0	0	0	0	0	0	0	0	0	0	0	0	0	0	0	0	0	0	0	0	0	0
A220-IA-Ⅱ	0	0	0	0	0	0	0	0	0	0	0	0	0	0	0	0	0	0	0	0	0	0	0	0	0	0	0	0	0	0	0	0	0	0	0	0	0	0	0	0	0	0	0	0	0	0	0	0	0
A221-IA-Ⅱ	0	0	0	0.0944921	0	0	0	0	0	0	0	0	0	0	0	0	0	0	0	0.00332423	0	0	0	0	0	0	0	0	0	0	0	0	0	0	0	0	0	0	0	0	0	0	0	0	0	0	0	0	0
A222-IA-Ⅱ	0	0	0	0	0	0	0	0	0	0	0	0	0	0	0	0	0	0	0	0.084994	0.0167056	0	0	0	0	0	0	0	0	0	0	0	0	0	0	0	0	0	0	0	0	0	0	0	0	0	0	0	0
A223-OH-Ⅱ	0	0	0	0	0	0	0	0.194234	0	0	0	0	0	0	0	0	0	0	0	0	0	0	0	0	0	0	0	0	0	0	0	0	0	0	0	0	0	0	0	0	0	0	0	0	0	0	0	0	0
A224-OH-Ⅱ	0	0	0	0	0	0	0	0	0	0	0	0	0	0	0	0	0	0	0	0	0	0	0	0	0	0	0	0	0	0	0	0	0	0	0	0	0	0	0	0	0	0	0	0	0	0	0	0	0
A225-OH-Ⅱ	0	0	0	0	0	0	0	0	0	0	0	0	0	0	0	0	0	0	0	0	0	0	0	0	0	0	0	0	0	0	0	0	0	0	0	0	0	0	0	0	0	0	0	0	0	0	0	0	0
A226-OH-Ⅱ	0	0	0	0	0	0	0	0	0	0	0	0	0	0	0	0	0	0	0	0	0	0	0	0	0	0	0	0	0	0	0	0	0	0	0	0	0	0	0	0	0	0	0	0	0	0	0	0	0
A227-OH-Ⅱ	0	0	0	0	0	0	0	0	0	0	0	0	0	0	0	0	0	0	0	0	0	0	0	0	0	0	0.0384608	0	0	0	0	0	0	0	0	0	0	0	0	0	0	0	0	0	0	0	0	0	0
A228-OH-Ⅱ	0	0	0	0	0	0	0	0	0	0	0	0	0	0	0	0	0	0	0	0	0	0	0	0	0	0	0	0	0	0	0	0	0	0	0	0	0	0	0	0	0	0	0	0	0	0	0	0	0
A229-IA-Ⅲ	0	0	0	0	0	0	0	0.167984	0	0	0	0	0	0	0	0	0	0	0	0	0	0	0	0	0	0	0	0	0	0	0	0	0	0	0	0	0	0	0	0	0	0	0	0	0	0	0	0	0
A230-IA-Ⅲ	0	0	0	0	0	0	0	0	0	0	0	0	0	0	0	0	0	0	0	0	0	0	0	0	0	0	0	0	0	0	0	0	0	0	0	0	0	0	0	0	0	0	0	0	0	0	0	0	0
A231-IL-Ⅲ	0	0	0	0	0	0	0	0	0	0	0	0	0	0	0	0	0	0	0	0	0	0	0	0	0	0	0.0775792	0	0	0	0	0	0	0	0	0	0	0	0	0	0	0	0	0	0	0	0	0	0
A232-IL-Ⅲ	0	0	0	0	0	0	0	0.0107604	0	0	0	0	0	0	0	0	0	0	0	0	0	0	0	0	0	0	0	0	0	0	0	0	0	0	0	0	0	0	0	0	0	0	0	0	0	0	0	0	0
A233-IL-Ⅲ	0	0	0	0	0	0	0	0	0	0	0	0	0	0	0	0	0	0	0	0	0	0	0	0	0	0	0	0	0	0	0	0	0	0	0	0	0	0	0	0	0	0	0	0	0	0	0	0	0
A234-IL-Ⅲ	0	0	0	0	0	0	0	0	0	0	0	0	0	0	0	0	0	0	0	0	0	0	0	0	0	0	0	0	0	0	0	0	0	0	0	0	0	0	0	0	0	0	0	0	0	0	0	0	0
A235-IL-Ⅲ	0	0	0	0	0	0	0	0	0	0	0	0	0.0989687	0	0	0	0	0	0	0	0	0	0	0	0	0	0	0	0	0	0	0	0	0	0	0	0	0	0	0	0	0	0	0	0	0	0	0	0
A236-IL-Ⅲ	0	0	0	0	0	0	0	0.0645144	0	0	0	0	0	0	0	0	0	0	0	0	0	0	0	0	0	0	0	0	0	0	0	0	0	0	0	0	0	0	0	0	0	0	0	0	0	0	0	0	0
A237-IL-Ⅲ	0	0	0	0	0	0	0	0.483518	0.12905	0	0	0	0	0	0	0	0	0	0	0	0	0	0	0	0	0	0	0	0	0	0	0	0	0	0	0	0	0	0	0	0	0	0	0	0	0	0	0	0
A238-IL-Ⅲ	0	0	0	0.054272	0	0	0	0	0	0	0	0	0	0	0	0	0	0	0	0	0	0	0	0	0	0	0	0	0	0	0	0	0	0	0	0	0	0	0	0	0	0	0	0	0	0	0	0	0
A239-IL-Ⅲ	0	0	0	0	0	0	0	0.050592	0.00470907	0	0	0	0	0	0	0	0	0	0	0	0	0	0	0	0	0	0	0	0	0	0	0	0	0	0	0	0	0	0	0	0	0	0	0	0	0	0	0	0
A240-IL-Ⅲ	0	0	0	0	0	0	0	0	0	0	0	0	0.0318502	0	0	0	0	0	0	0	0	0	0	0	0	0	0	0	0	0	0	0	0	0	0	0	0	0	0	0	0	0	0	0	0	0	0	0	0
A241-IL-Ⅲ	0	0	0	0	0	0	0	0	0	0	0	0	0	0	0	0	0	0	0	0	0	0	0	0	0	0	0	0	0	0	0	0	0	0	0	0	0	0	0	0	0	0	0	0	0	0	0	0	0
A242-IL-Ⅲ	0	0	0	0	0	0	0	0	0	0	0	0	0.0633984	0	0	0	0	0	0	0	0	0	0	0	0	0	0	0	0	0	0	0	0	0	0	0	0	0	0	0	0	0	0	0	0	0	0	0	0
A243-IA-Ⅲ	0	0	0	0	0	0	0	0.0802873	0	0	0	0	0	0	0	0	0	0	0	0	0	0	0	0	0	0	0	0	0	0	0	0	0	0	0	0	0	0	0	0	0	0	0	0	0	0	0	0	0
A244-IA-Ⅲ	0	0	0	0	0	0	0	0.12805	0	0	0	0	0	0	0	0	0	0	0	0	0	0	0	0	0	0	0	0	0	0	0	0	0	0	0	0	0	0	0	0	0	0	0	0	0	0	0	0	0
A245-IA-Ⅲ	0	0	0	0	0	0	0	0.00756209	0	0	0	0	0	0	0	0	0	0	0	0	0	0	0	0	0	0.0206389	0	0	0	0	0	0	0	0	0	0	0	0	0	0.0218286	0	0	0	0	0	0	0	0	0
A246-IA-Ⅲ	0	0	0	0	0	0	0	0.0353409	0	0	0	0	0	0	0	0	0	0	0	0	0	0	0	0	0	0	0	0	0	0	0	0	0	0	0	0	0	0	0	0	0	0	0	0	0	0	0	0	0
A247-IA-Ⅲ	0	0	0	0	0	0	0	0	0	0	0	0	0	0	0	0	0	0	0	0.0604439	0	0	0	0	0	0	0	0	0	0	0	0	0	0	0	0	0	0	0	0	0	0	0	0	0	0	0	0	0
A248-IA-Ⅲ	0	0	0	0	0	0	0	0	0	0	0	0	0	0	0	0	0	0	0	0	0	0	0	0	0	0	0	0	0	0	0	0	0	0	0	0	0	0	0	0	0	0	0	0	0	0	0	0	0
A249-IA-Ⅲ	0	0	0	0	0	0	0	0	0	0	0	0	0	0	0	0	0	0	0	0.0658283	0	0	0	0	0	0	0	0	0	0	0	0	0	0	0	0	0	0	0	0	0	0	0	0	0	0	0	0	0
A250-IA-Ⅲ	0	0	0	0	0	0	0	0	0	0	0	0	0	0	0	0	0	0	0	0	0	0	0	0	0	0	0	0	0	0	0	0	0	0	0	0	0	0	0	0	0	0	0	0	0	0	0	0	0
A251-IA-Ⅲ	0	0	0	0	0	0	0	0.0775584	0	0	0	0	0	0	0	0	0	0	0	0	0	0	0	0	0	0	0	0	0	0	0	0	0	0	0	0	0	0	0	0	0	0	0	0	0	0	0	0	0
A252-IA-Ⅲ	0	0	0	0	0	0	0	0.0212024	0	0	0	0	0	0	0	0	0	0	0	0	0	0	0	0	0	0	0	0	0	0	0	0	0	0	0	0	0	0	0	0	0	0	0	0	0	0	0	0	0
A253-IA-Ⅲ	0	0	0	0	0	0	0	0.0765435	0	0	0	0	0.0448238	0	0	0	0	0	0	0	0	0	0	0	0	0	0	0	0	0	0	0	0	0	0	0	0	0	0	0	0	0	0	0	0	0	0	0	0
A254-OH-Ⅲ	0	0	0	0	0	0	0	0.0211702	0	0	0	0	0	0	0	0	0	0	0	0	0	0	0	0	0	0	0	0	0	0	0	0	0	0	0	0	0	0	0	0	0	0	0	0	0	0	0	0	0
A255-OH-Ⅲ	0	0	0	0	0	0	0	0.130493	0	0	0	0	0	0	0	0	0	0	0	0	0	0	0	0	0	0	0	0	0	0	0	0	0	0	0	0	0	0	0	0	0	0.0695513	0	0	0	0	0	0	0
A256-OH-Ⅲ	0	0.00308952	0	0	0	0	0	0.223613	0.185475	0	0	0.0284126	0	0	0	0	0	0	0	0	0	0	0	0	0	0.108772	0	0	0.0511611	0.108585	0	0	0	0	0	0	0	0	0	0	0	0.324659	0	0	0	0	0	0	0
A257-OH-Ⅲ	0	0	0	0	0	0	0	0.171331	0	0	0	0	0	0	0	0	0	0	0	0.022045	0	0	0	0	0	0	0	0	0	0	0	0	0	0	0	0	0	0	0	0	0	0	0	0	0	0	0	0	0
A258-Ⅲ	0	0	0	0	0	0	0	0	0	0	0	0	0	0	0	0	0	0	0	0.0329888	0	0	0	0	0	0	0	0	0	0	0	0	0	0	0	0	0	0	0	0	0	0	0	0	0	0	0	0	0
A259-Ⅲ	0	0	0	0	0	0	0	0	0	0	0	0	0	0	0	0	0	0	0	0	0	0	0	0	0	0	0	0	0	0	0	0	0	0	0	0	0	0	0	0	0	0	0	0	0	0	0	0	0
A260-Ⅲ	0	0	0	0	0	0	0	0	0	0	0	0	0	0	0	0	0	0	0	0	0	0	0	0	0	0	0	0	0	0	0	0	0	0	0	0	0	0	0	0	0	0	0	0	0	0	0	0	0
A261-Ⅲ	0	0	0	0	0	0	0	0	0	0	0	0	0	0	0	0	0	0	0	0	0	0	0	0	0	0	0	0	0	0	0	0	0	0	0	0	0	0	0	0	0	0	0	0	0	0	0	0	0
A262-Ⅲ	0	0	0	0	0	0	0	0	0	0	0	0	0	0	0	0	0	0	0	0	0	0	0	0	0	0	0	0	0	0	0	0	0	0	0	0	0	0	0	0	0	0	0	0	0	0	0	0	0
A263-Ⅲ	0	0	0	0	0	0	0	0.0445872	0	0	0	0.198542	0.0730823	0	0	0	0	0	0	0	0	0	0	0	0	0	0	0	0	0.0784288	0	0	0	0	0	0	0	0	0	0	0	0	0	0	0	0	0	0	0
A264-Ⅲ	0	0	0	0	0	0	0	0	0	0	0	0	0	0	0	0	0	0	0	0	0	0	0	0	0	0	0	0	0	0	0	0	0	0	0	0	0	0	0	0	0	0	0	0	0	0	0	0	0
A265-IL-Ⅳ	0	0	0	0	0	0	0	0	0	0	0	0	0	0	0	0	0	0	0	0	0	0	0	0	0	0	0	0	0	0	0	0	0	0	0	0	0	0	0	0	0	0	0	0	0	0	0	0	0
A266-IL-Ⅳ	0	0	0	0	0	0	0	0	0	0	0	0	0	0	0	0	0	0	0	0	0	0	0	0	0	0	0	0	0	0	0	0	0	0	0	0	0	0	0	0	0	0	0	0	0	0	0	0	0
A267-IL-Ⅳ	0	0	0	0	0	0	0	0.0944043	0	0	0	0	0	0	0	0	0	0	0	0	0	0	0	0	0	0	0	0	0	0	0	0	0	0	0	0	0	0	0	0	0	0	0	0	0	0	0	0	0
A268-IL-Ⅳ	0	0	0	0	0	0	0	0.177923	0.0305399	0	0	0.10804	0	0	0	0	0	0	0	0	0	0	0	0	0	0	0	0	0	0	0	0	0	0	0.0380636	0	0	0	0	0	0	0	0	0	0	0.00299772	0	0	0
A269-IL-Ⅳ	0	0	0	0	0	0	0	0.272592	0	0	0	0	0	0	0	0	0	0	0	0	0	0	0	0	0	0	0	0	0	0	0	0	0	0	0	0	0	0	0	0	0	0	0	0	0	0	0	0	0
A270-IL-Ⅳ	0	0	0	0	0	0	0	0	0	0	0	0	0	0	0	0	0	0	0	0	0	0	0	0	0	0	0	0	0	0	0	0	0	0	0	0	0	0	0	0	0	0	0	0	0	0	0	0	0
A271-AR-Ⅳ	0	0	0.0313894	0	0	0	0	0.071206	0	0	0	0	0	0	0.0164117	0	0	0	0	0	0	0	0	0	0	0	0	0	0	0	0	0	0.114289	0	0	0	0	0	0	0	0	0.0232415	0	0	0	0	0	0	0
A272-AR-Ⅳ	0	0	0	0	0	0	0	0.111729	0.0132653	0	0	0.0486667	0	0	0	0	0	0	0	0	0	0	0	0	0	0	0	0	0	0	0	0	0	0	0	0	0	0	0	0	0	0	0	0	0	0	0	0	0
A273-AR-Ⅳ	0.0404762	0	0	0	0	0	0	0.553257	0.229397	0	0	0.158273	0.114622	0	0	0	0	0	0	0	0	0	0	0	0	0	0	0	0	0.148612	0	0	0	0.124273	0	0	0	0.197429	0.0264723	0	0.0085148	0.271356	0.0260163	0	0	0	0	0	0
A274-AR-Ⅳ	0.0685116	0	0	0	0	0.0364414	0.0561662	0	0	0	0	0.079477	0.045919	0	0	0.0661625	0.0591739	0	0	0	0	0.029542	0.172029	0.0184815	0.144271	0.158533	0.234936	0	0	0.146033	0.0170227	0	0	0	0.168817	0	0	0	0.049782	0	0.0157959	0.258258	0.197371	0	0	0.0657572	0	0	0
A275-AR-Ⅳ	0	0	0	0	0	0.124791	0.0272437	0.249588	0.22893	0	0	0.167286	0.182248	0	0.0583411	0	0	0	0	0	0	0.00734125	0	0	0	0.0998506	0	0	0.0184502	0.291039	0.118121	0	0	0	0	0	0	0	0.0820921	0.0133077	0.0161758	0.273735	0.101191	0	0	0	0.148596	0.0408085	0
A276-AR-Ⅳ	0	0.144355	0.0660016	0.00960913	0	0	0	0.215097	0.0657029	0	0	0	0.0429749	0	0.165985	0	0	0.0186953	0	0	0	0	0	0	0	0	0	0.079653	0	0	0	0	0.265316	0	0	0.0794202	0	0	0.0813488	0	0	0	0	0	0	0	0	0	0
A277-AR-Ⅳ	0.0165353	0	0	0	0	0	0	0.159379	0.0437336	0	0	0	0	0	0	0	0.0282346	0.13603	0.0120492	0.0247176	0	0	0	0	0	0	0	0	0	0.10863	0	0.025595	0	0.148337	0	0	0	0.132922	0	0	0	0.16258	0	0.0164612	0	0	0	0	0
A278-AR-Ⅳ	0	0	0	0	0	0	0	0.384648	0.173373	0	0	0.0273472	0	0	0	0	0.113625	0	0.00173245	0	0	0	0	0	0	0	0	0	0	0	0	0	0	0	0	0	0	0	0	0	0	0.0600067	0	0	0	0	0.0120251	0	0.084516
A279-AR-Ⅳ	0	0	0	0	0	0.0536594	0	0.290956	0.149919	0	0	0.264911	0.175254	0	0	0	0.0410314	0	0	0	0	0.00439673	0	0	0	0.10931	0	0	0.0115144	0.194584	0.0201511	0	0.0404516	0	0.11635	0	0	0	0.12742	0	0.0334076	0.194029	0.0571208	0	0	0	0	0	0
A280-AR-Ⅳ	0	0	0	0	0	0	0	0.274388	0.0719143	0	0	0.11872	0.0737356	0	0	0	0	0	0	0	0	0	0	0	0	0	0	0	0	0.012323	0	0	0	0	0	0	0	0	0	0	0	0.101834	0.00566673	0	0	0	0	0	0
A281-AR-Ⅳ	0	0.120052	0	0.0624747	0	0.0720637	0	0.14973	0.110804	0	0	0.0930585	0.108538	0	0.124753	0.0350058	0	0	0	0	0	0.101726	0	0	0	0.0471997	0.0371854	0.0342411	0.0237211	0	0	0	0.0554654	0	0.048229	0.05227	0	0	0.124298	0.179788	0	0	0	0	0	0	0.118721	0.109579	0.0681943
A282-IL-Ⅳ	0.238337	0	0	0	0	0	0.0298441	0.378851	0.211186	0	0	0	0.0588131	0.0443126	0	0	0.0607008	0	0.0768024	0	0	0	0.0400153	0.0258473	0	0	0	0	0	0	0.0412914	0	0	0.0140205	0	0	0	0.121756	0	0.0528654	0.0501547	0.0532421	0	0	0	0.0390068	0.210449	0.192441	0
A283-IL-Ⅳ	0	0	0	0	0	0	0	0.0301012	0	0.00605429	0	0	0	0	0	0	0	0	0	0	0	0	0	0	0	0	0	0	0	0	0	0.000489663	0	0	0	0	0	0.0225997	0	0	0	0	0	0	0.0692295	0	0	0	0
A284-IL-Ⅳ	0	0	0	0	0	0	0	0	0	0	0	0.0505366	0	0	0	0	0	0	0	0	0	0	0	0	0	0	0.0677478	0	0	0.0325282	0	0	0	0	0	0	0	0	0	0	0	0	0	0	0	0.00728373	0	0	0
A285-IL-Ⅳ	0	0	0	0	0	0	0	0.0431438	0	0	0	0	0	0	0	0	0	0	0	0	0	0	0	0	0	0	0	0	0	0.0536964	0	0	0	0	0	0	0	0	0	0	0	0	0	0	0	0	0	0	0
A286-IL-Ⅳ	0	0	0	0	0	0	0	0.202842	0	0	0	0	0	0	0	0	0	0	0	0	0	0	0	0	0	0	0	0	0	0	0	0	0	0	0	0	0	0	0	0	0	0	0	0	0	0	0	0	0
A287-IL-Ⅳ	0	0	0	0	0	0	0	0.0420359	0	0	0	0	0	0	0	0	0	0	0	0	0	0	0	0	0	0	0	0	0	0	0	0	0	0	0	0	0	0	0	0	0	0	0	0	0	0	0	0	0
A288-IL-Ⅳ	0	0	0	0	0	0	0	0	0	0	0	0	0.0466849	0	0	0	0	0	0	0	0	0	0	0	0	0	0	0	0	0	0	0	0	0	0	0	0	0	0	0	0	0	0	0	0	0	0	0	0
A289-IL-Ⅳ	0	0	0	0	0	0	0	0.176778	0	0	0	0	0	0	0	0	0	0	0	0	0	0	0	0	0	0	0	0	0	0	0	0	0	0	0	0	0	0	0	0	0	0	0	0	0	0	0	0	0
A290-IL-Ⅳ	0	0	0	0	0	0	0	0.163725	0	0	0	0	0	0	0	0	0	0	0	0	0	0	0	0	0	0	0	0	0	0	0	0	0	0	0	0	0	0	0	0	0	0	0	0	0	0	0	0	0
A291-IL-Ⅳ	0	0	0	0	0	0	0	0	0	0	0	0	0	0	0	0	0	0	0	0	0	0	0	0	0	0	0	0	0	0	0	0	0	0	0	0	0	0	0	0	0	0	0	0	0	0	0	0	0
A292-IL-Ⅳ	0	0	0	0	0	0	0	0	0	0	0	0	0	0	0	0	0	0	0	0	0	0	0	0	0	0	0	0	0	0	0	0	0	0	0	0	0	0	0	0	0	0	0	0	0	0	0	0	0
A293-IL-Ⅳ	0	0	0	0	0	0	0	0	0	0	0	0	0	0	0	0	0	0	0	0	0	0	0	0	0	0	0	0	0	0	0	0	0	0	0.0160755	0	0	0	0	0	0	0	0	0	0	0	0	0	0
A294-IL-Ⅳ	0	0	0	0	0	0	0	0	0	0	0	0	0	0	0	0	0	0	0	0	0	0	0	0	0	0	0	0	0	0	0	0	0	0	0	0	0	0	0	0	0	0	0	0	0	0	0	0	0
A295-IL-Ⅳ	0	0	0	0	0	0	0	0.00216304	0	0	0	0	0	0	0	0	0	0	0	0	0	0	0	0	0	0	0	0	0	0	0	0	0	0	0	0	0	0	0	0	0	0	0	0	0	0	0	0	0
A296-IL-Ⅳ	0	0	0	0	0	0	0	0.263487	0.0485015	0	0	0.0344663	0.0508068	0	0	0	0	0	0	0	0	0.00441828	0.173576	0	0.0285796	0	0	0	0	0.154881	0.0206846	0	0	0	0	0	0	0	0	0.110485	0	0	0	0	0	0.154888	0.0405849	0.0803096	0.0308072
A297-IA-Ⅳ	0	0	0	0	0	0	0	0	0	0	0	0	0	0	0	0	0	0	0	0	0	0	0	0	0	0	0	0	0	0	0	0	0	0	0	0	0	0	0	0	0	0	0	0	0	0	0	0	0
A298-Ⅳ	0	0	0	0	0	0	0	0	0	0	0	0	0	0	0	0	0	0	0	0	0	0	0	0	0	0	0	0	0	0	0	0	0	0	0	0	0	0	0	0	0	0	0	0	0	0	0	0	0
A299-Ⅳ	0	0	0	0	0	0.00217804	0	0.241206	0.157163	0	0	0.0763998	0	0	0	0	0	0	0	0	0	0	0	0	0	0.0192178	0	0	0.0128605	0.0258568	0.00306992	0	0	0	0.015845	0	0	0	0	0	0	0	0	0	0	0	0.116837	0.083894	0
A300-Ⅳ	0	0	0	0	0	0	0	0	0	0	0	0	0	0	0	0	0	0	0	0	0	0	0	0	0	0	0	0	0	0	0	0	0	0	0	0	0	0	0	0	0	0	0	0	0	0	0	0	0
[truncated: 528 more columns]
